# Supplementary material for: Design, synthesis, and biological evaluation of new pyrimidine-5-carbonitrile derivatives as novel anti-cancer, dual EGFRWT/COX-2 inhibitors with docking studies
Source: Royal Society of Chemistry journal article supplement (doi:10.1039/d3ra06088h), 2023-01-01

## Design, Synthesis, and Biological Evaluation of New Pyrimidine-5-carbonitrile Derivatives as Novel Anti-cancer, Dual EGFR<sup>WT</sup>/COX-2 Inhibitors with Docking Studies.

Nada Reda<sup>a,\*</sup>, Ahmed Elshewy<sup>b,c</sup>, Hesham I. EL-Askarye, Khaled O. Mohamed<sup>b</sup>, Amira A. Helwa<sup>a</sup>

### Spectral Data

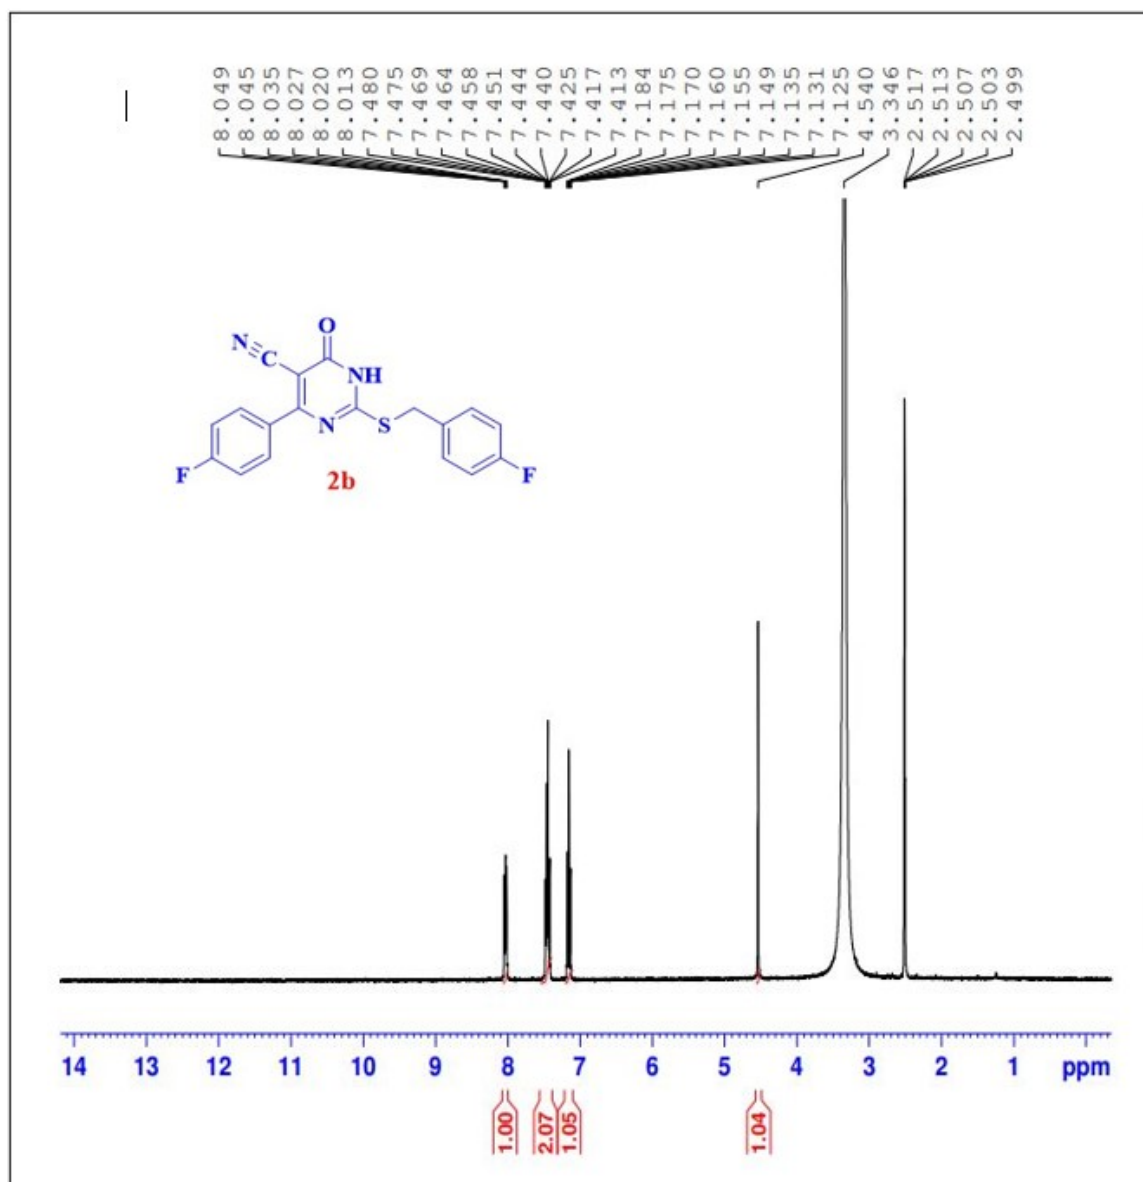

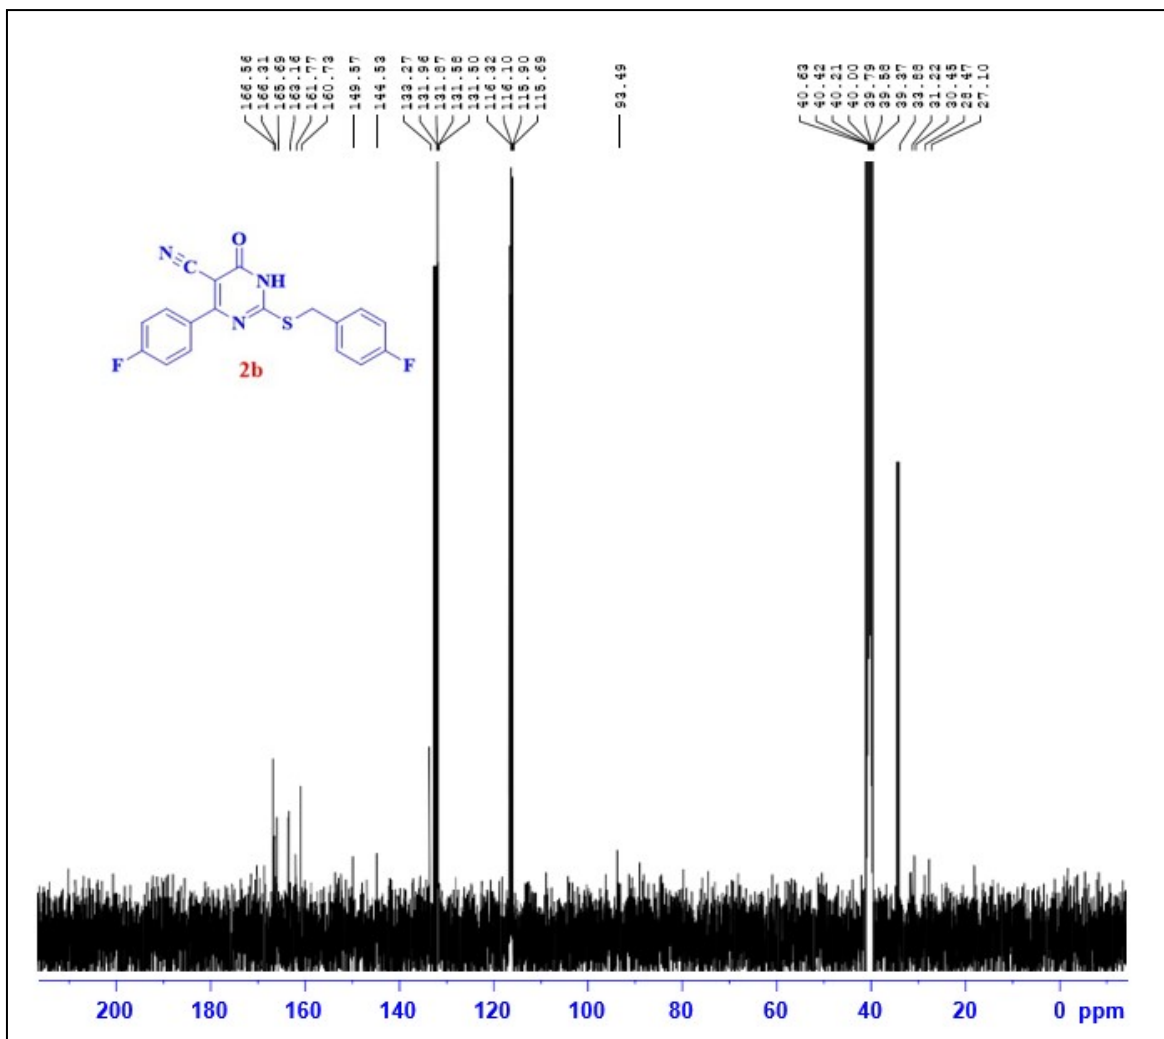

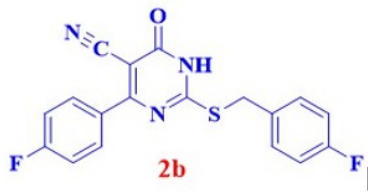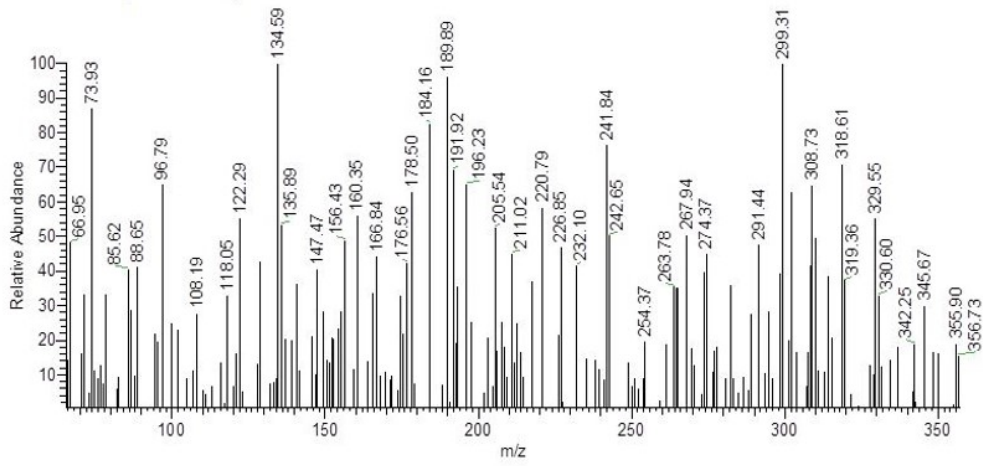

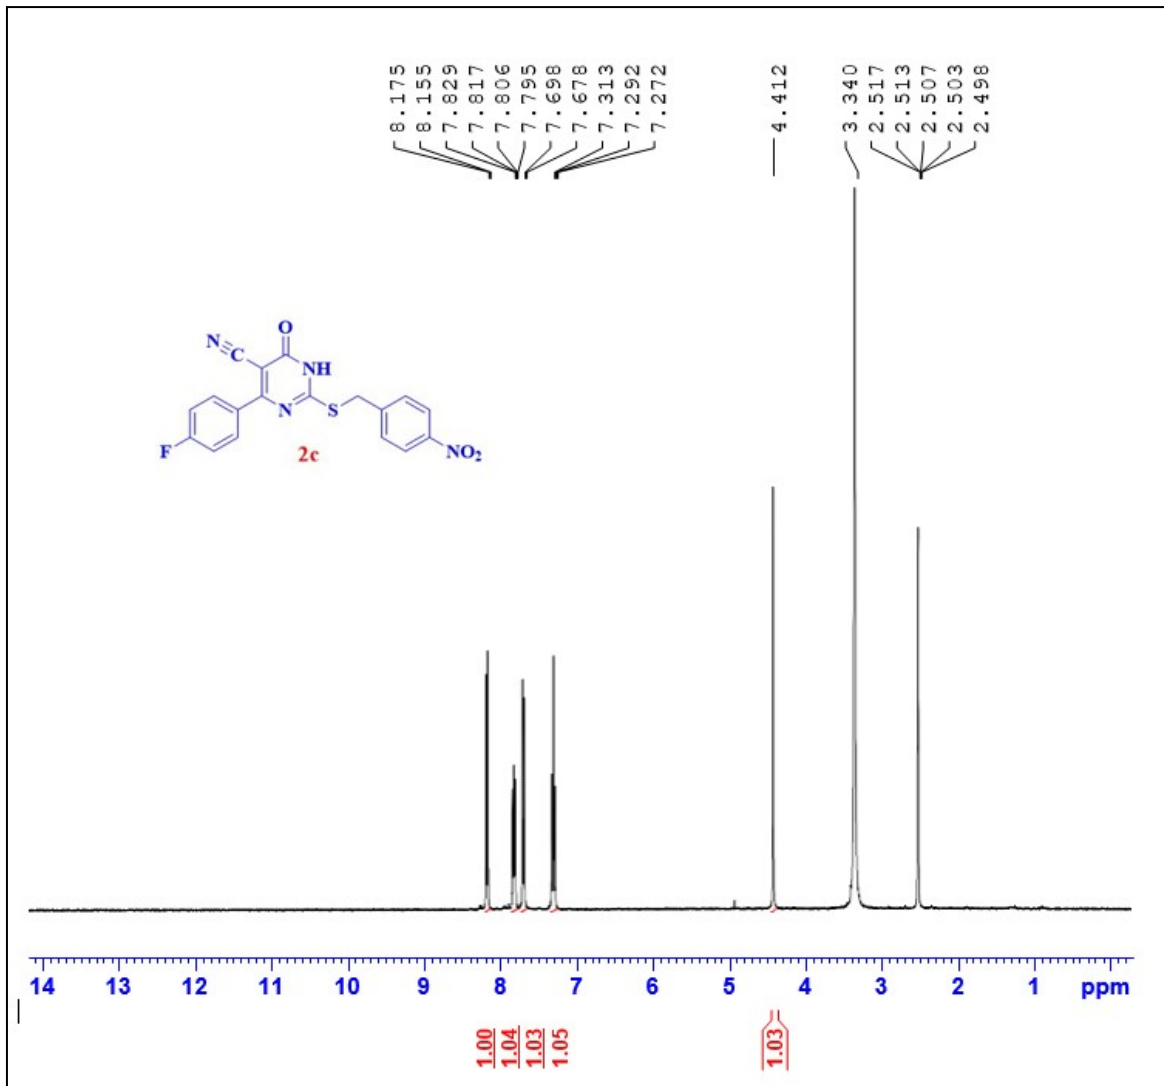

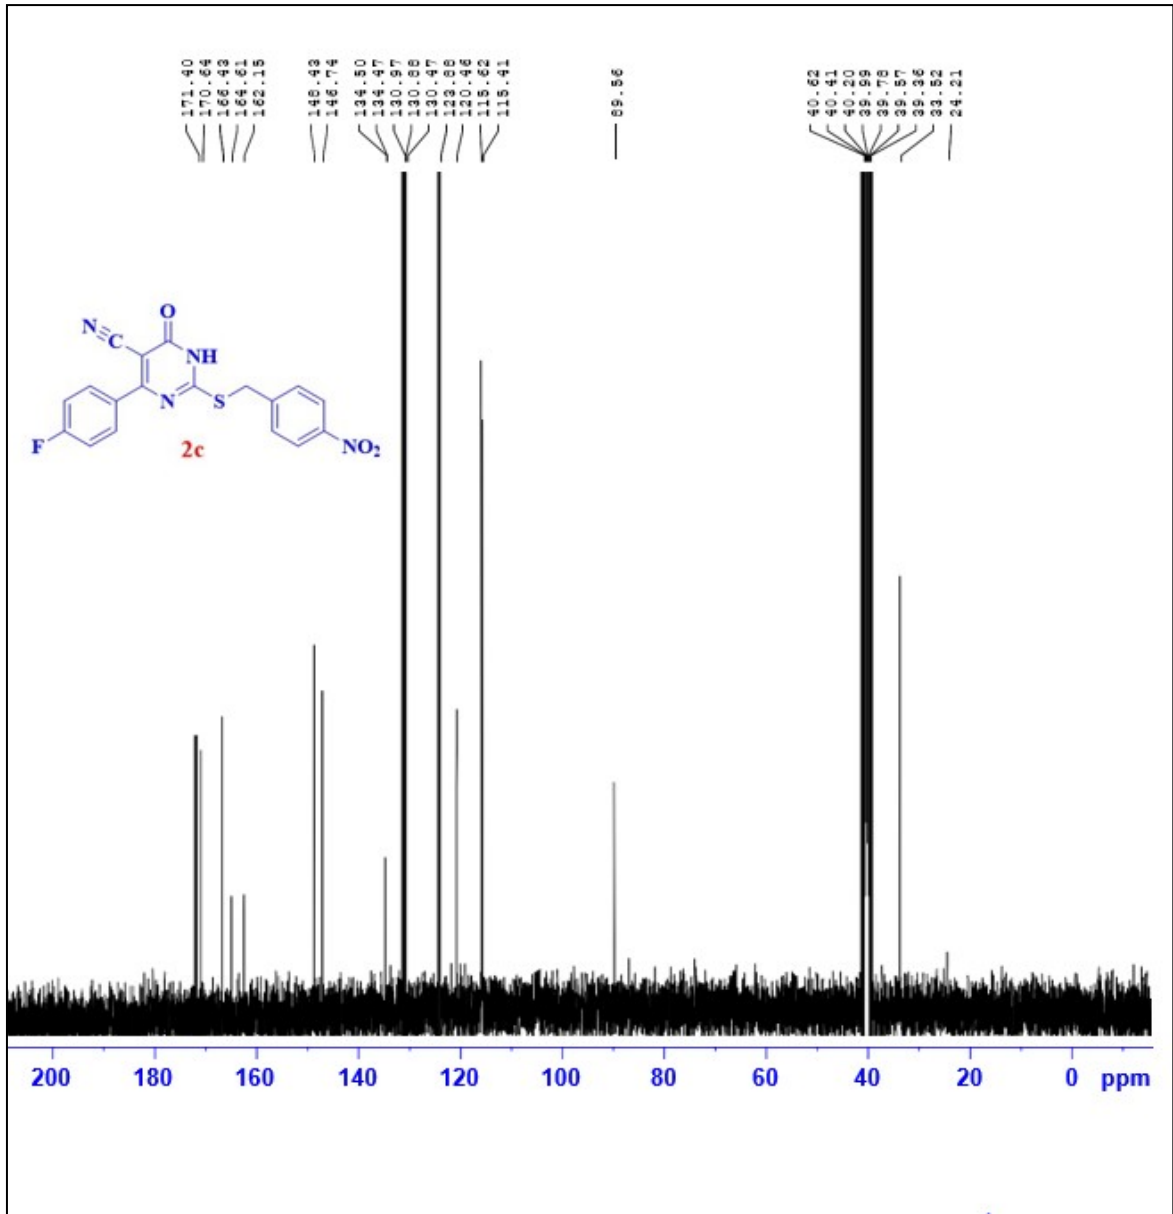

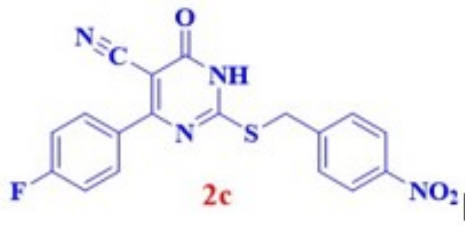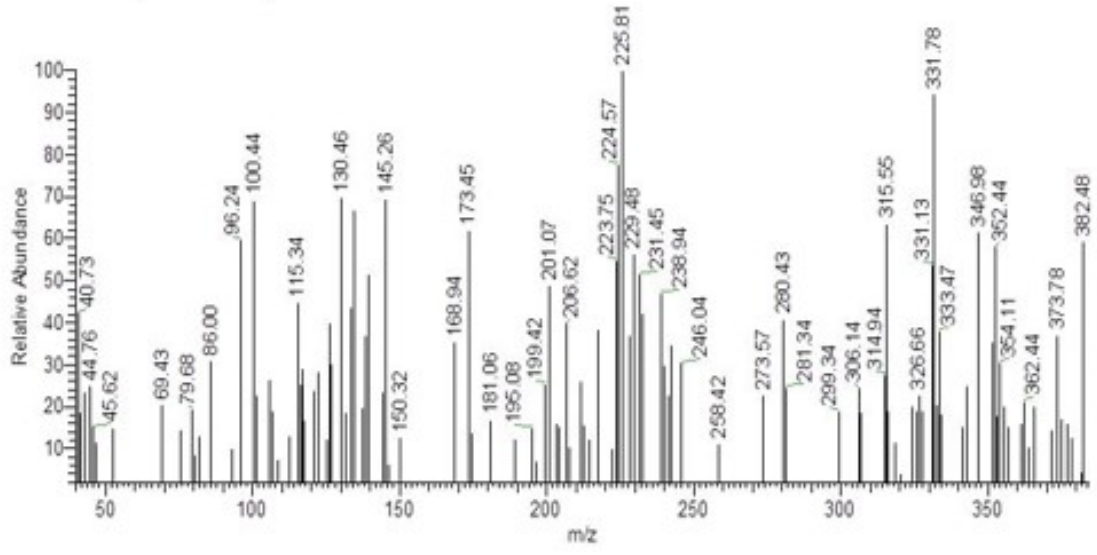

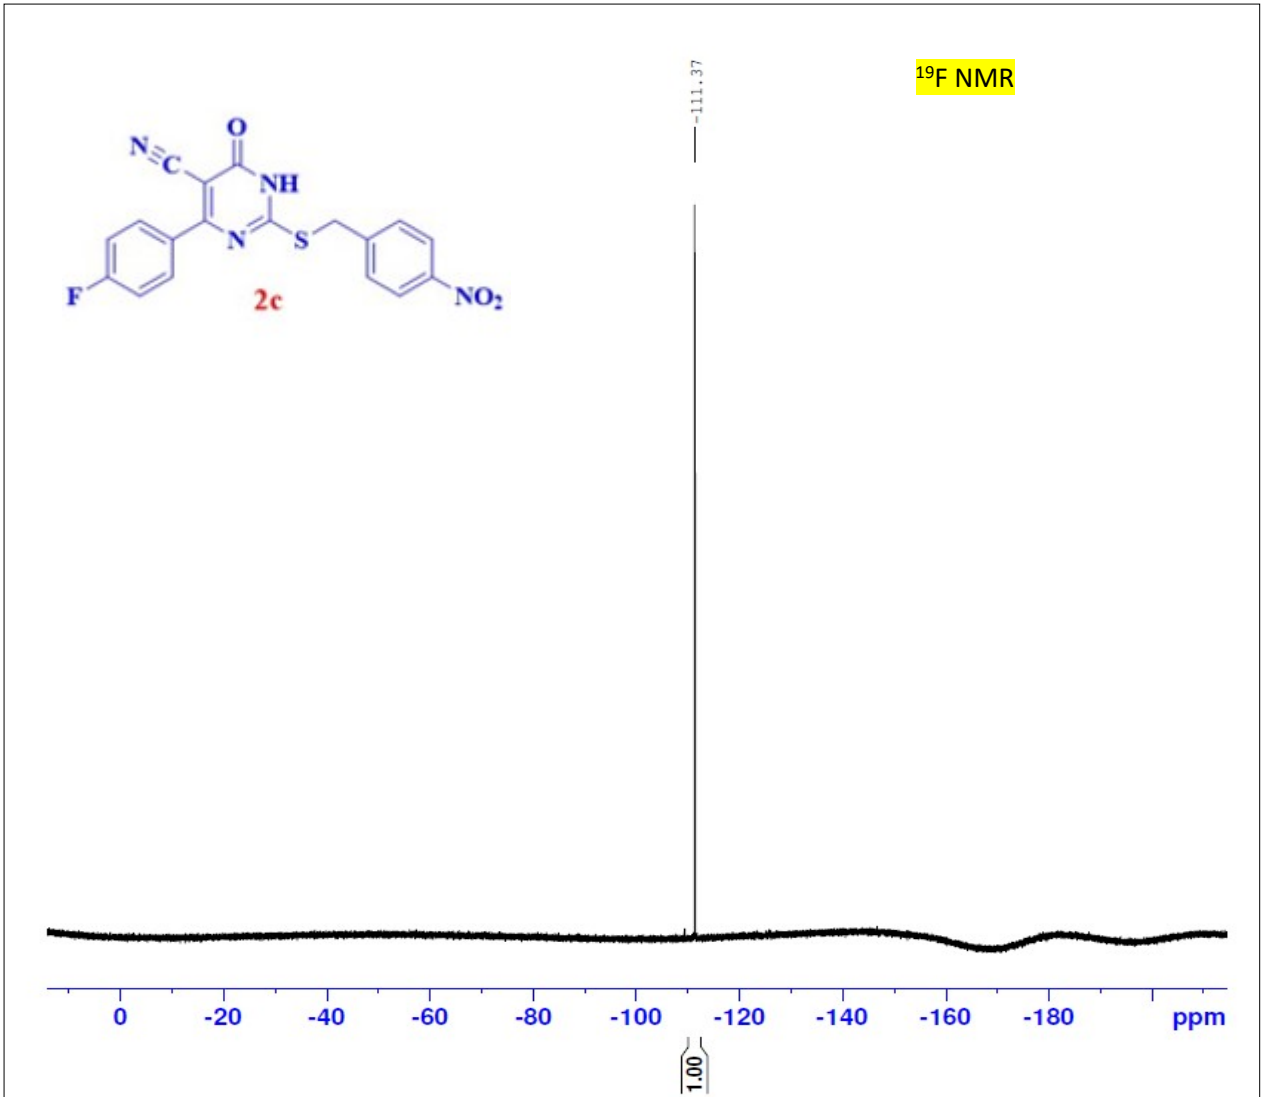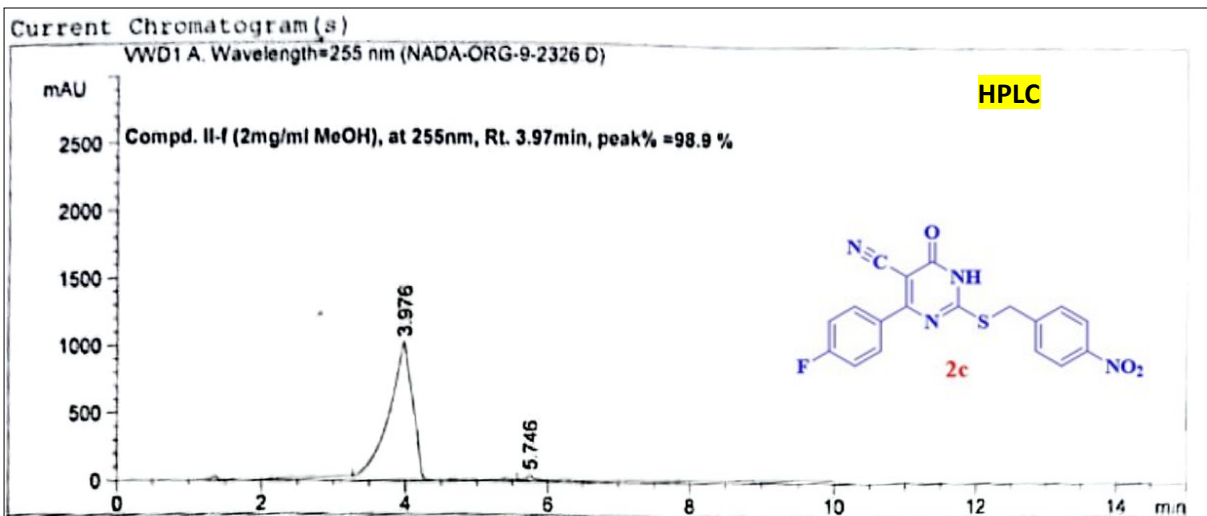

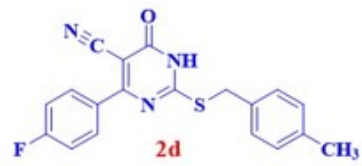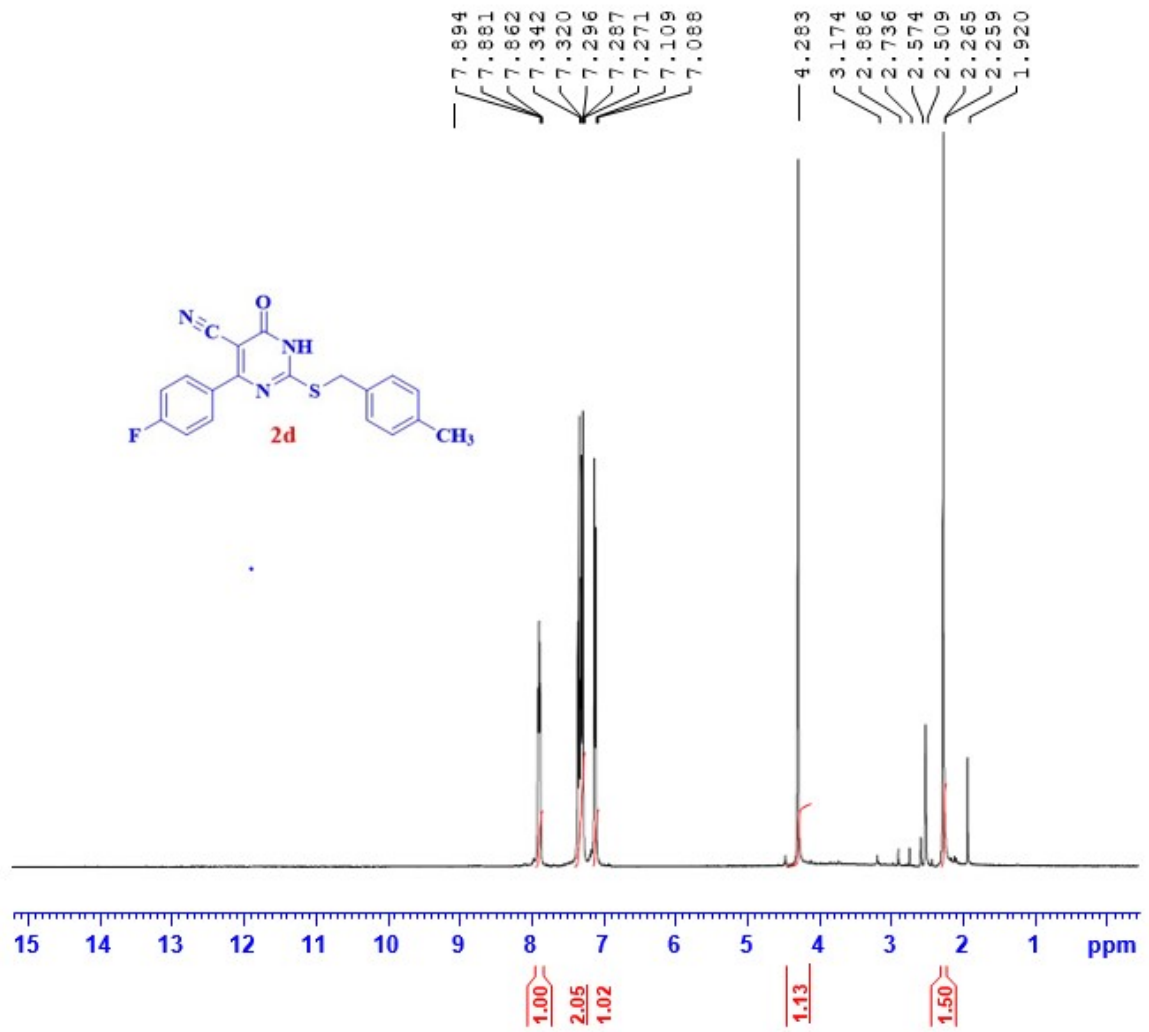



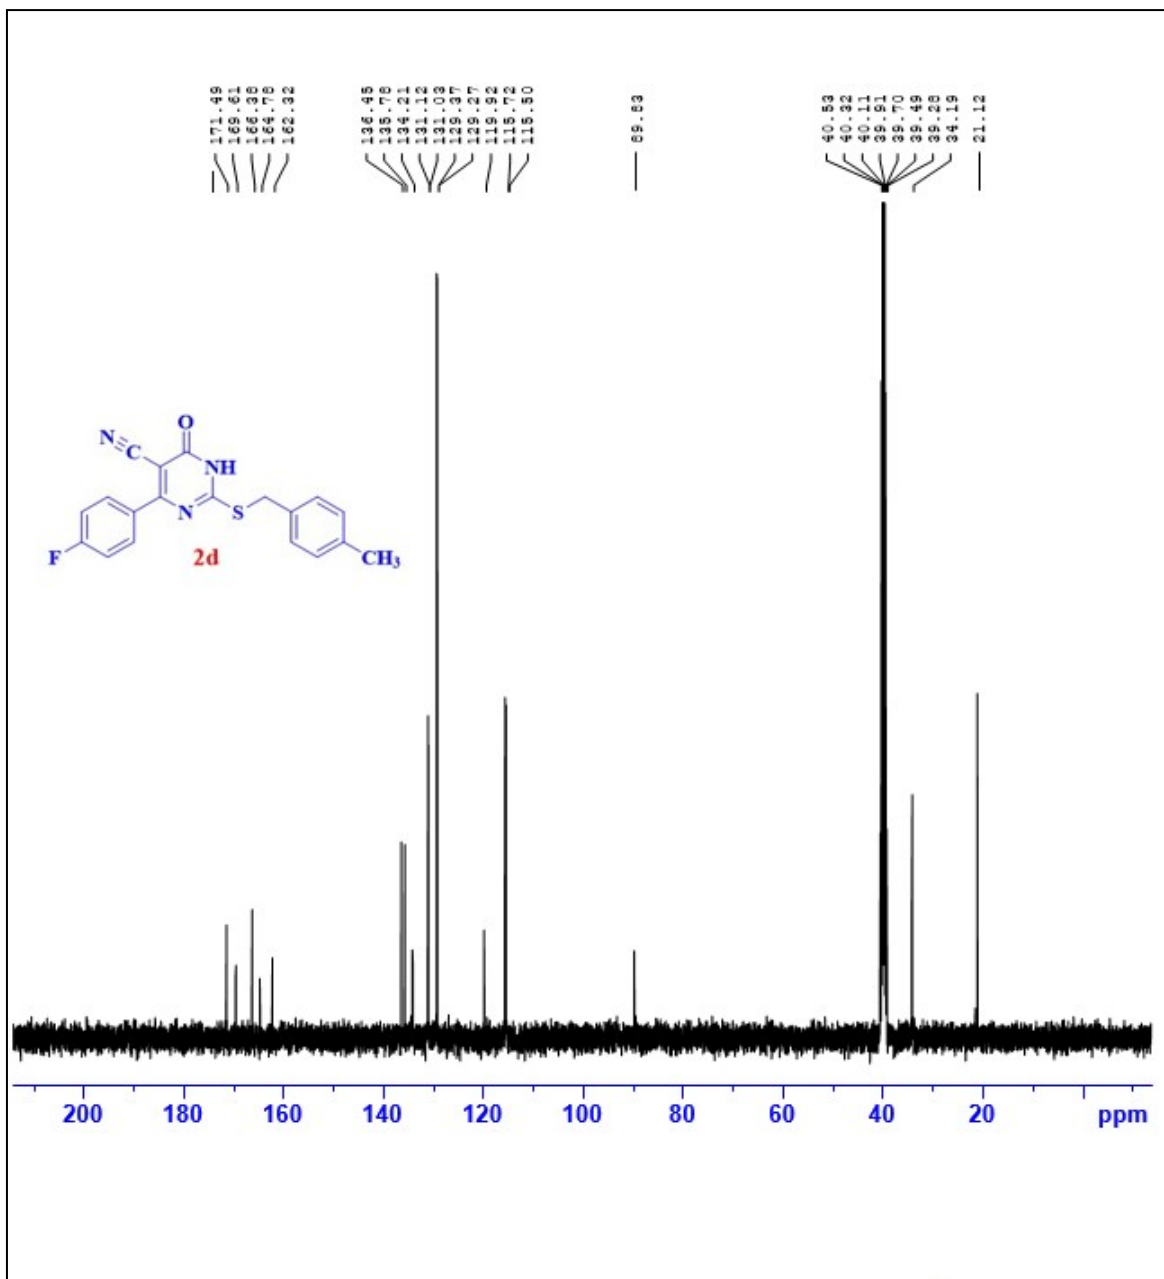

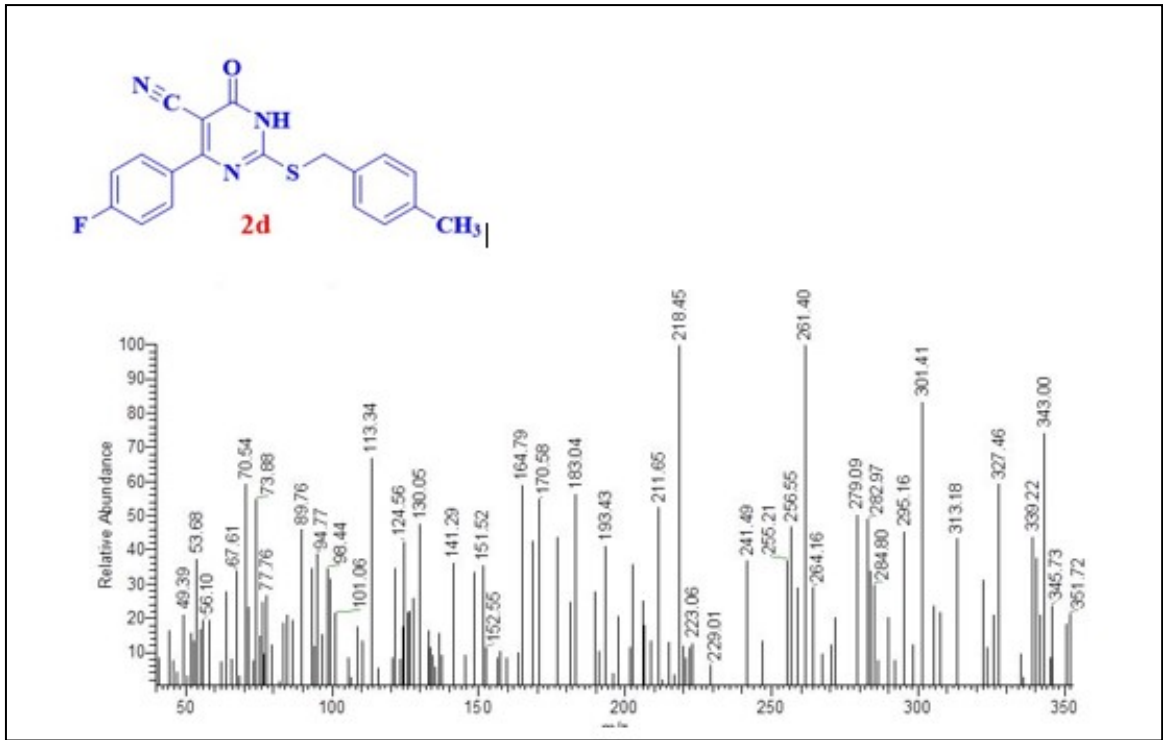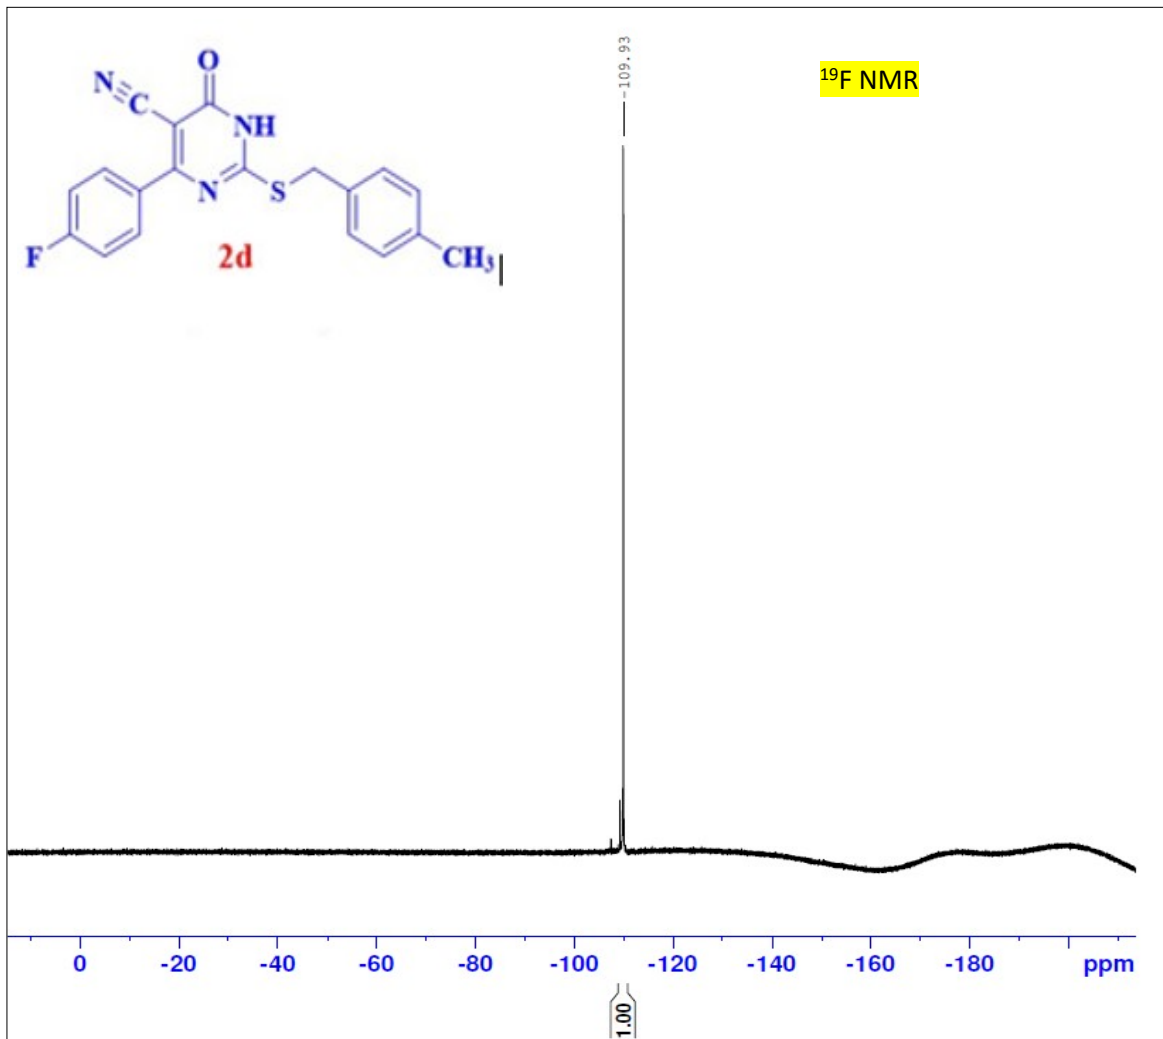

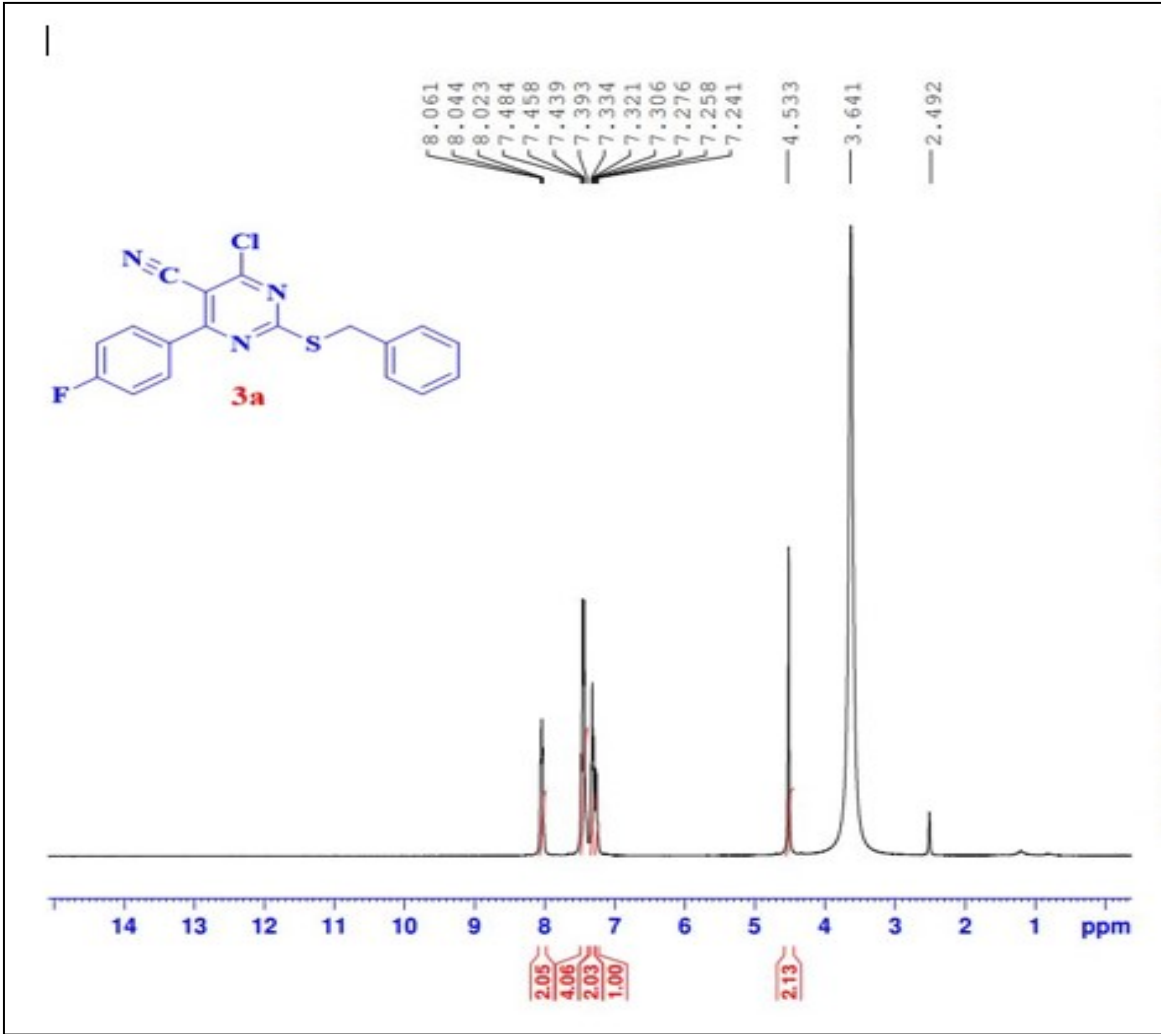

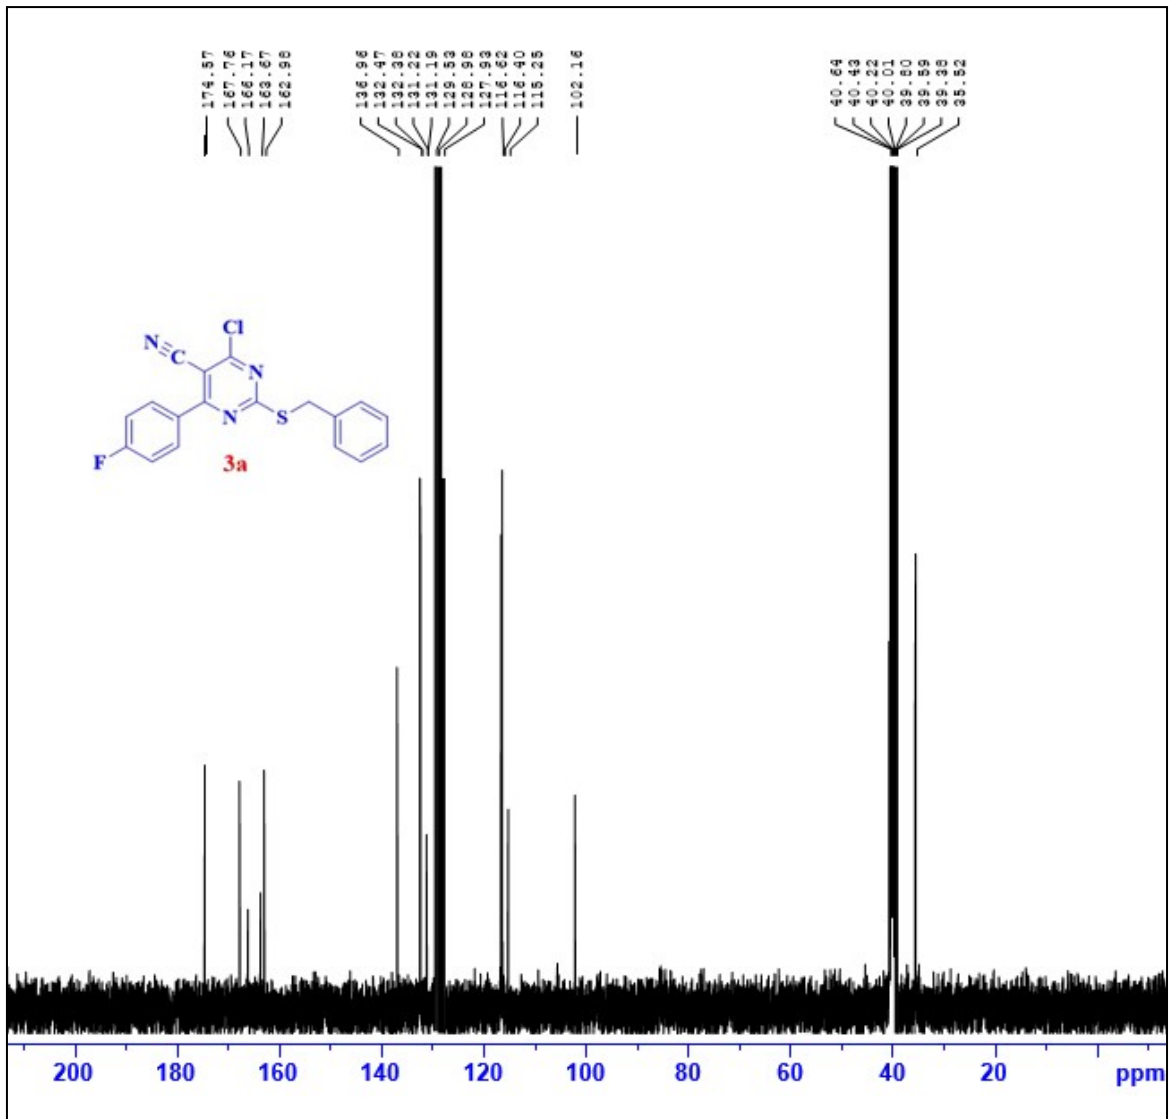

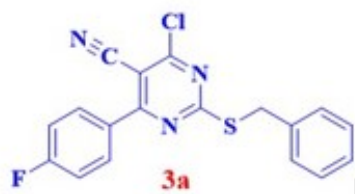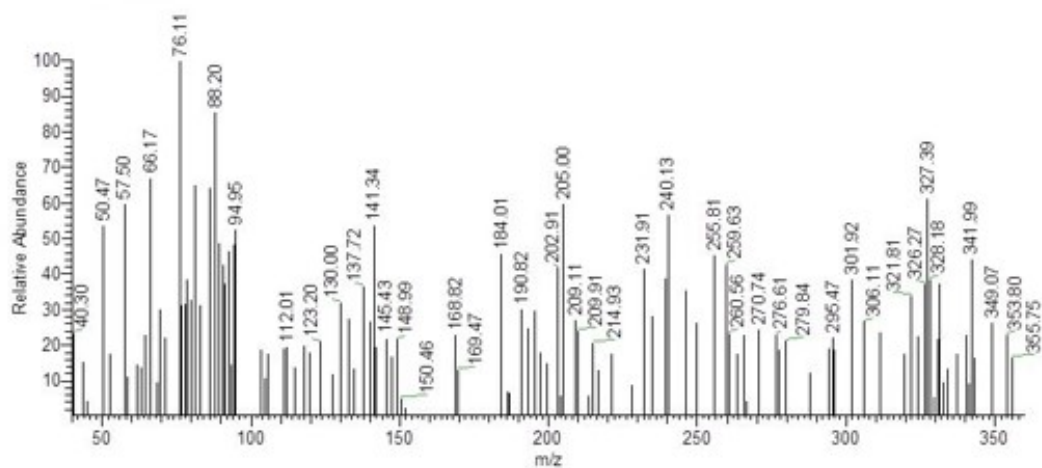

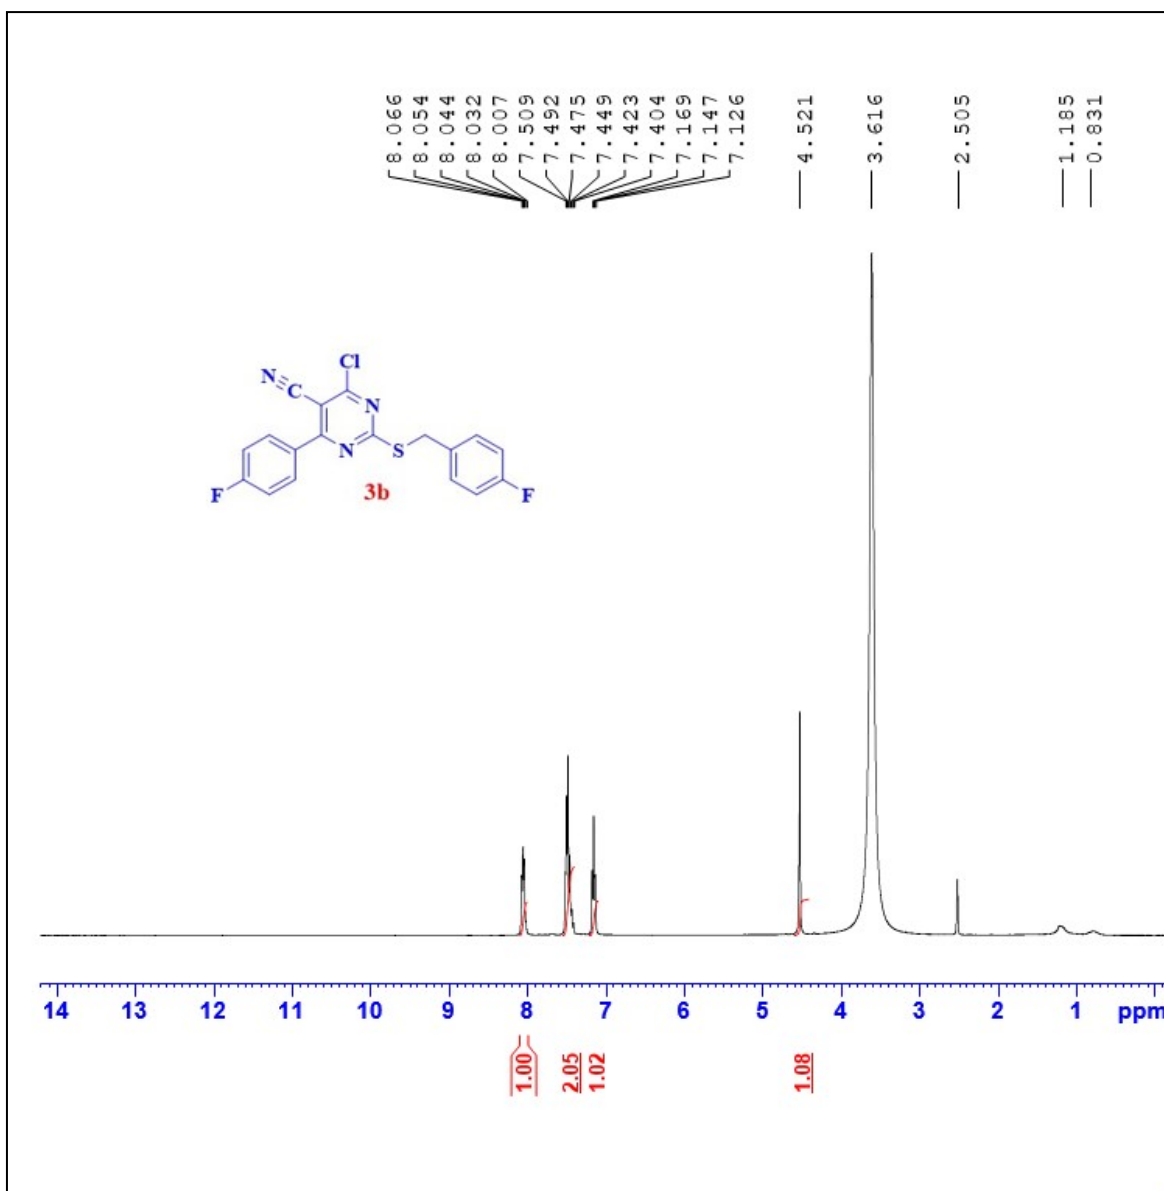

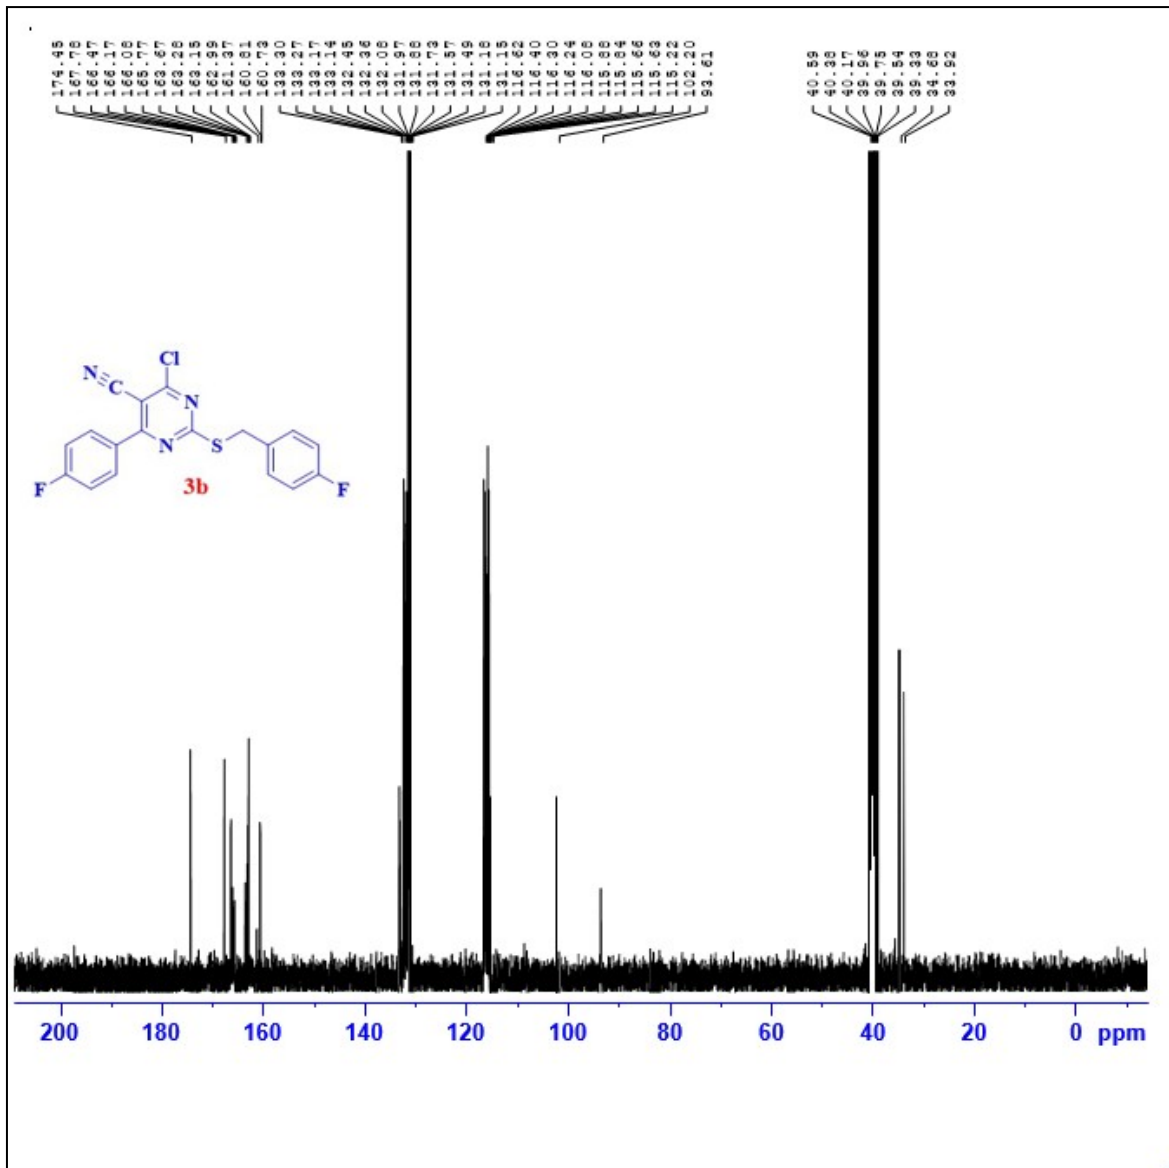

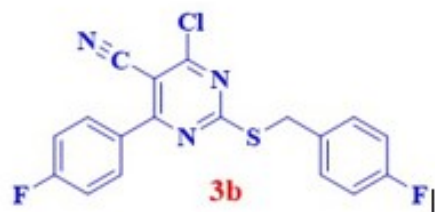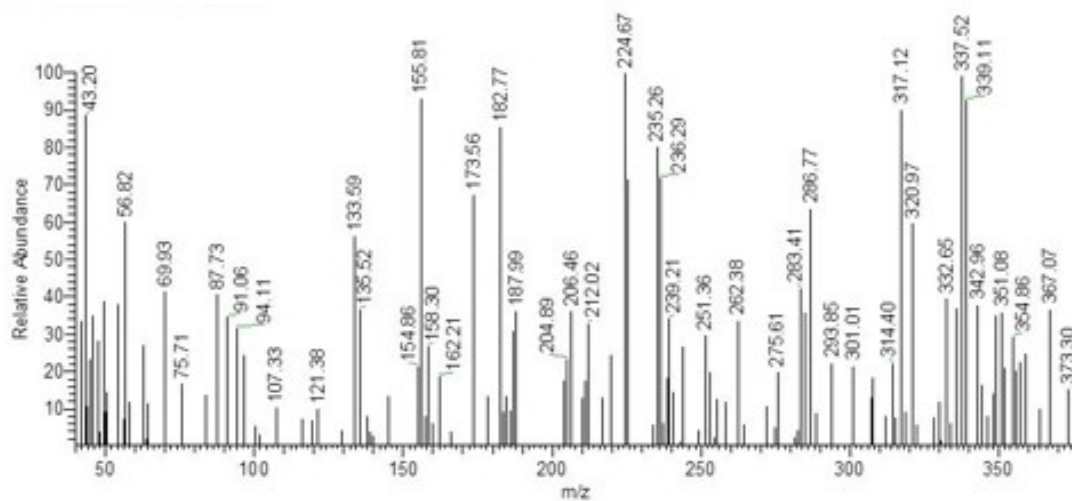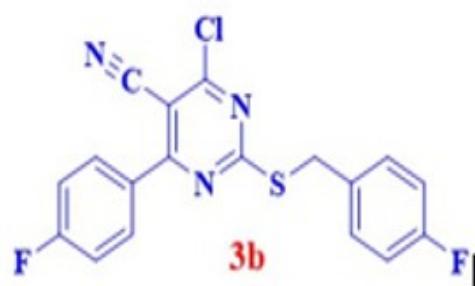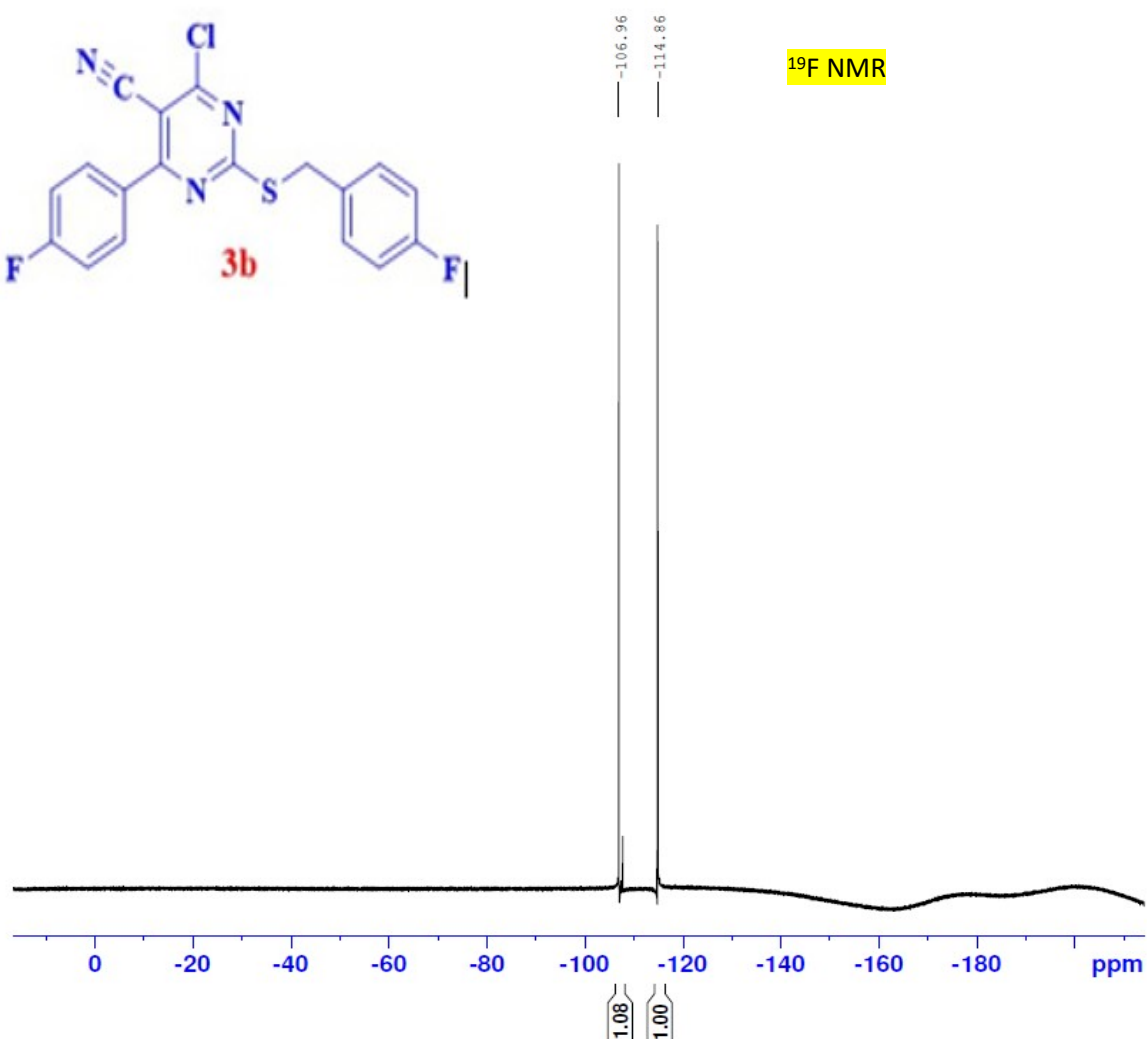



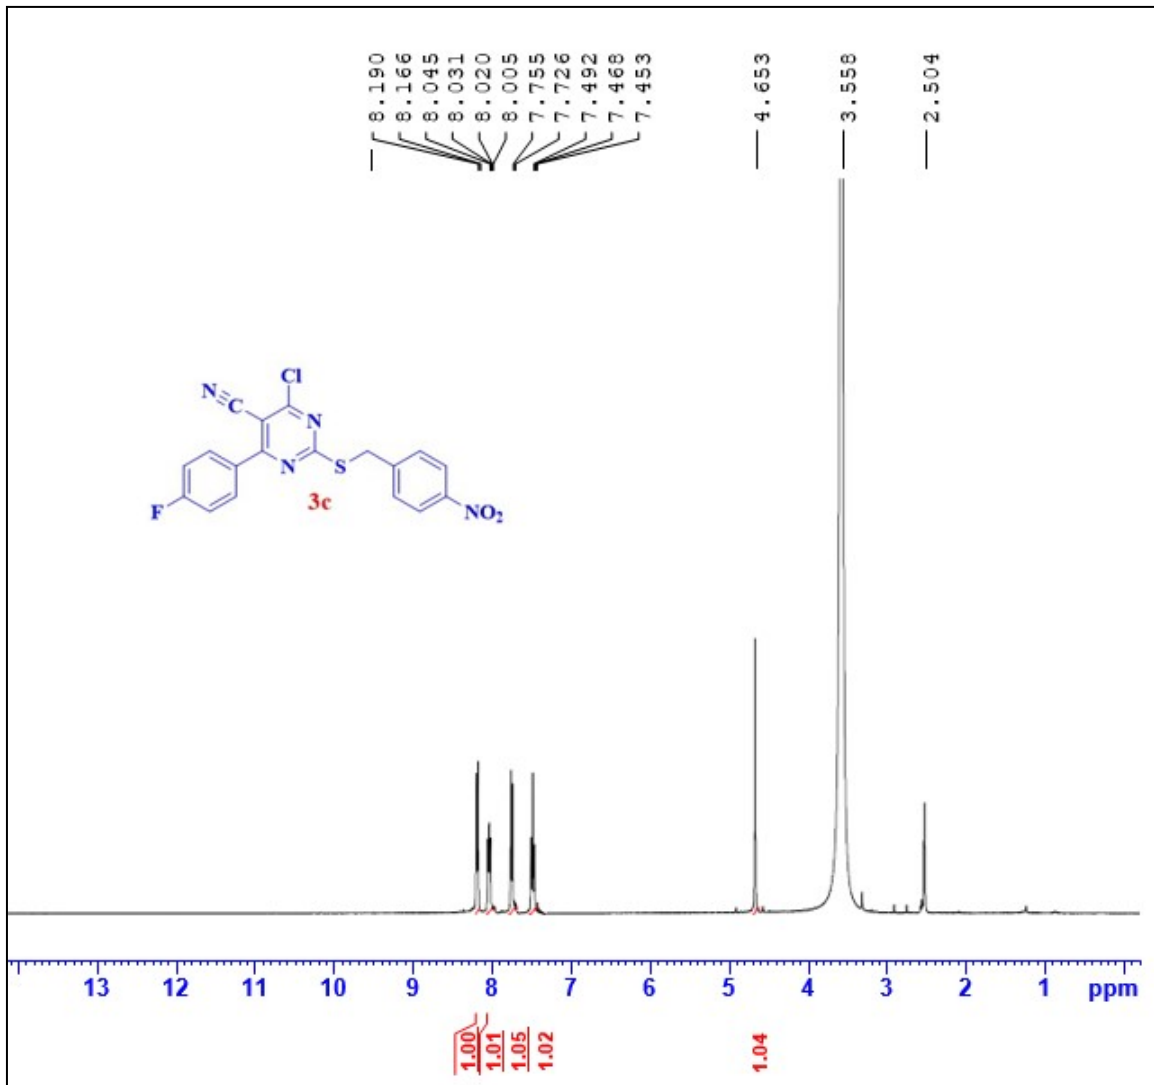

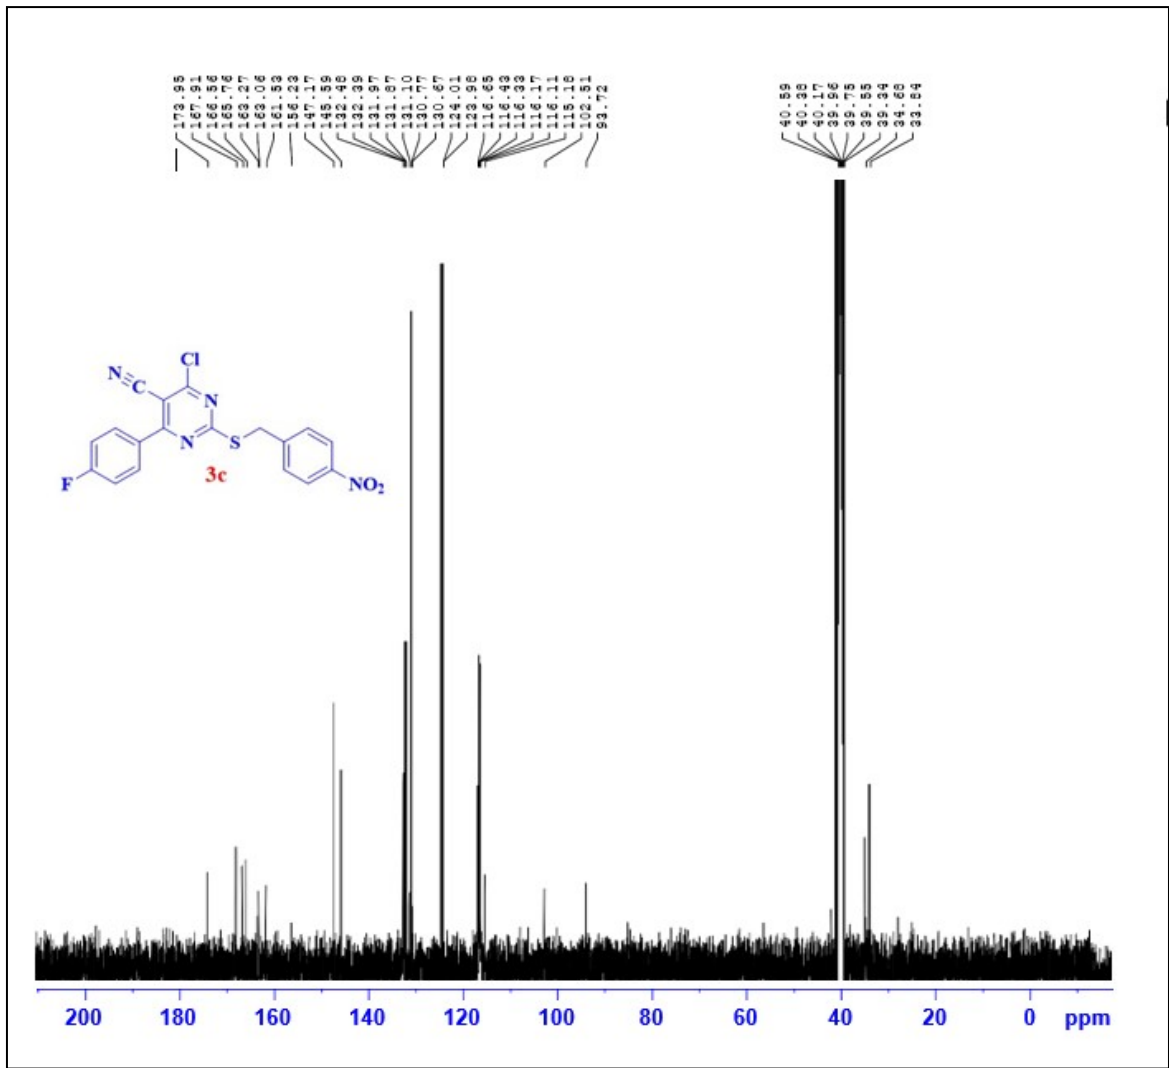

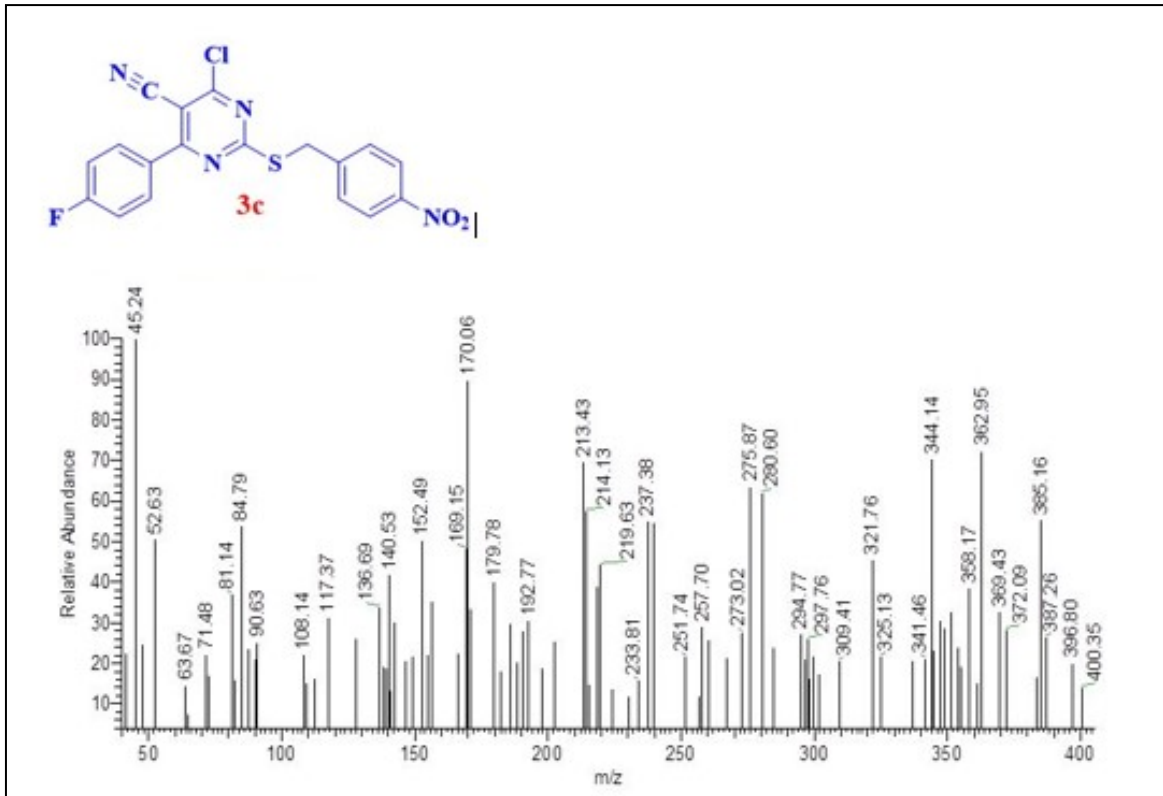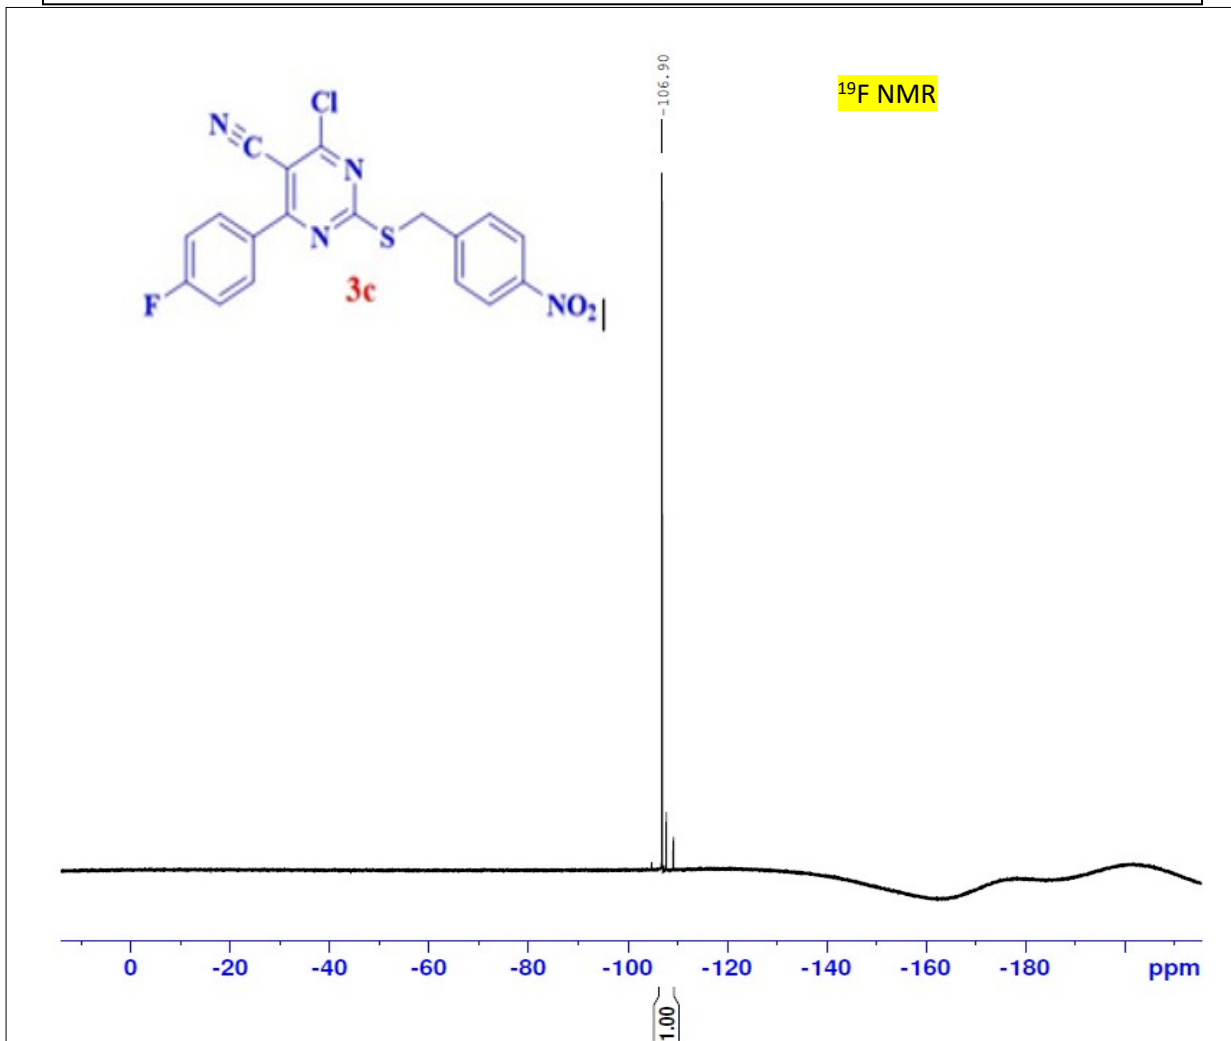

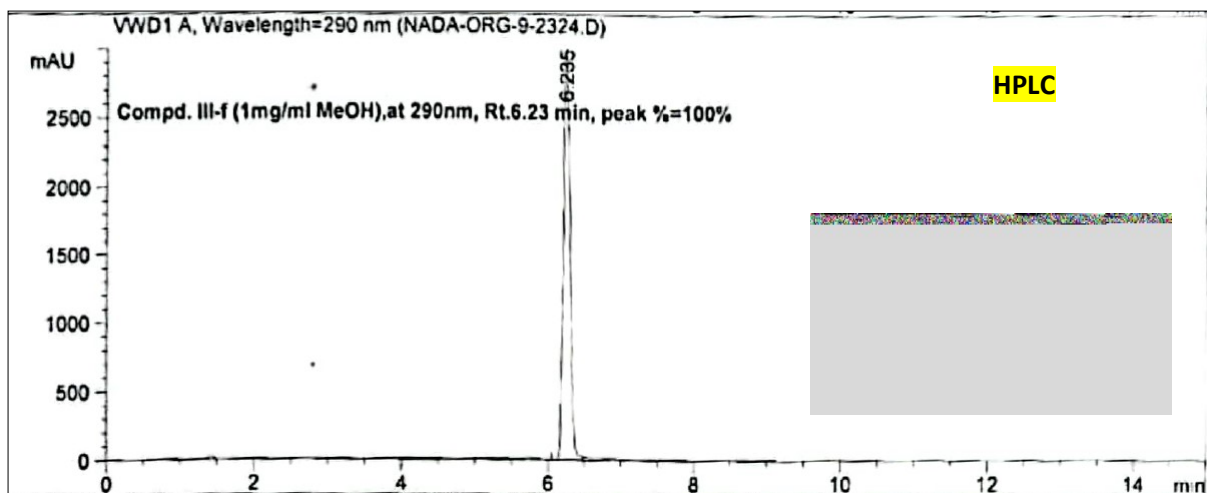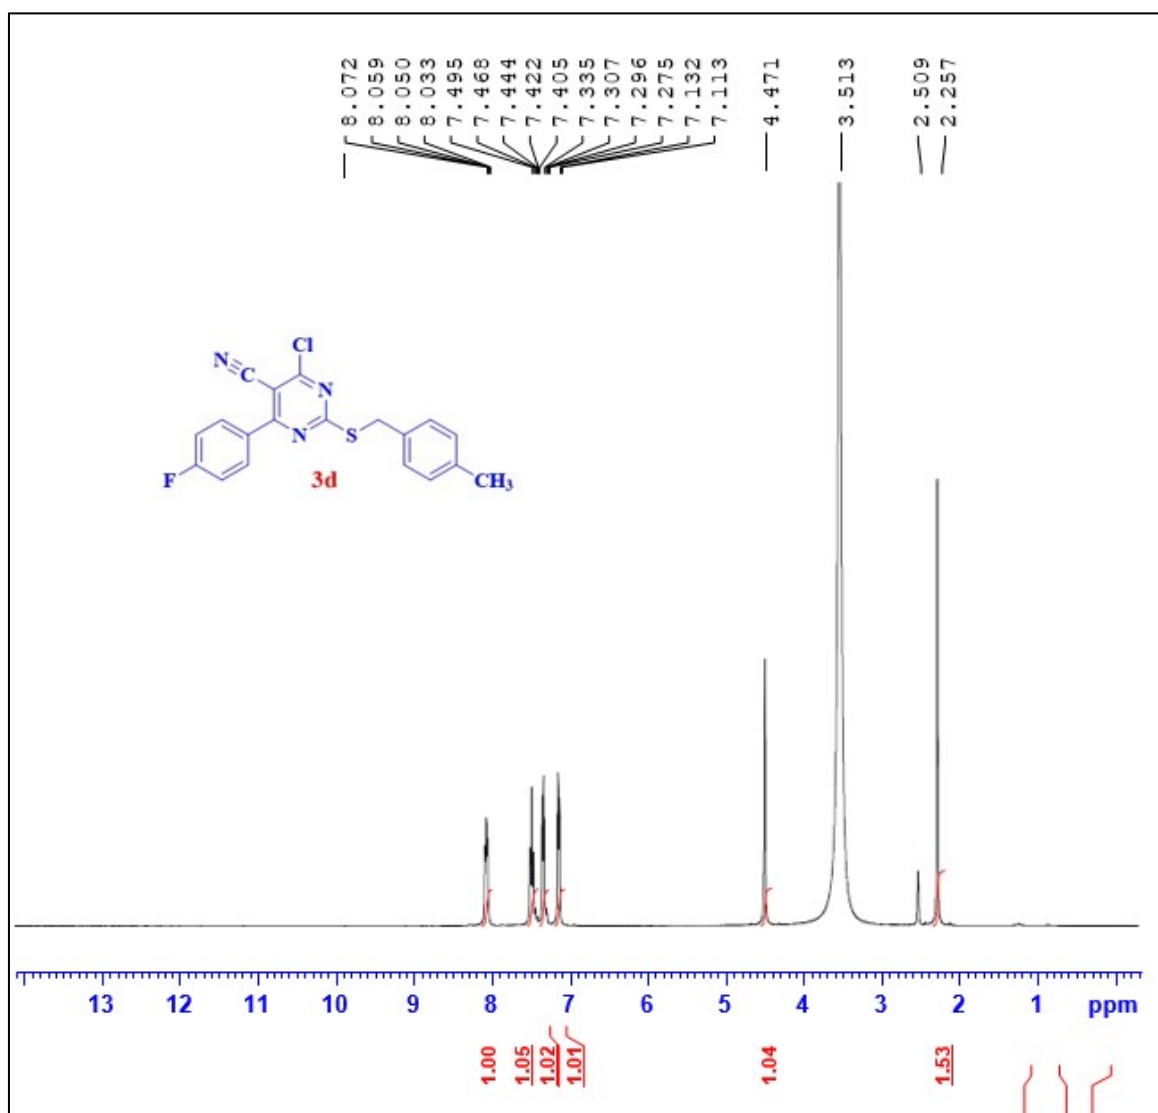

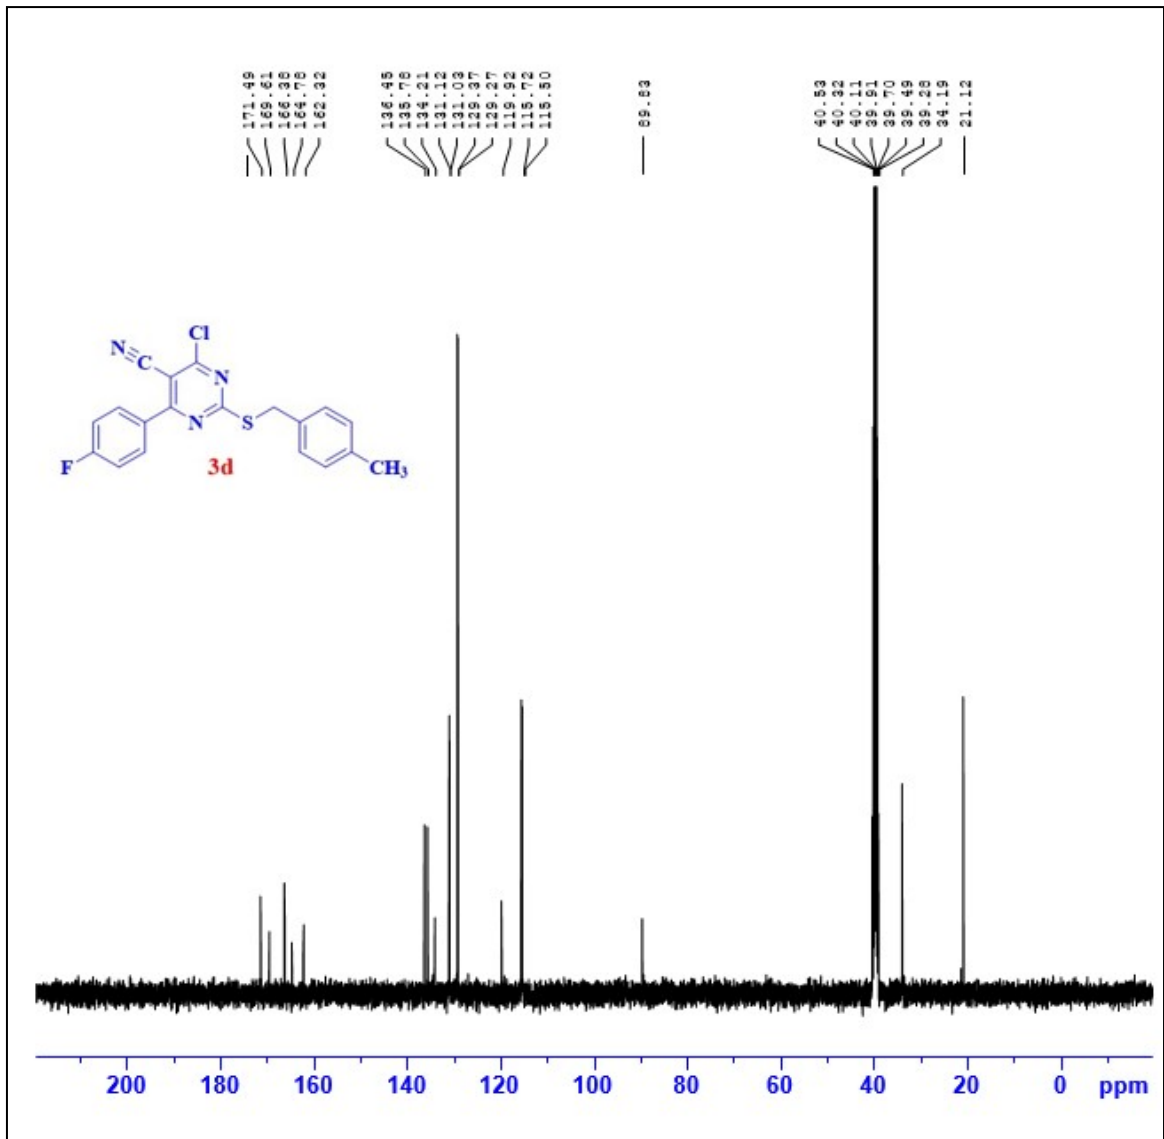

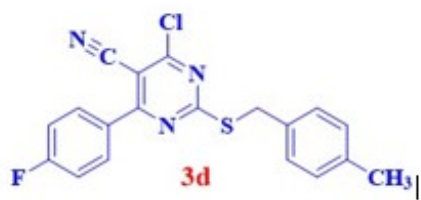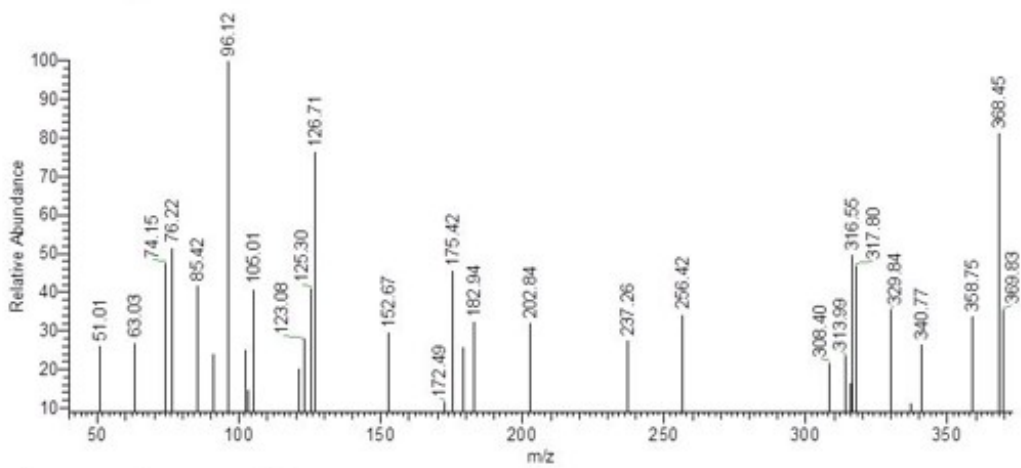

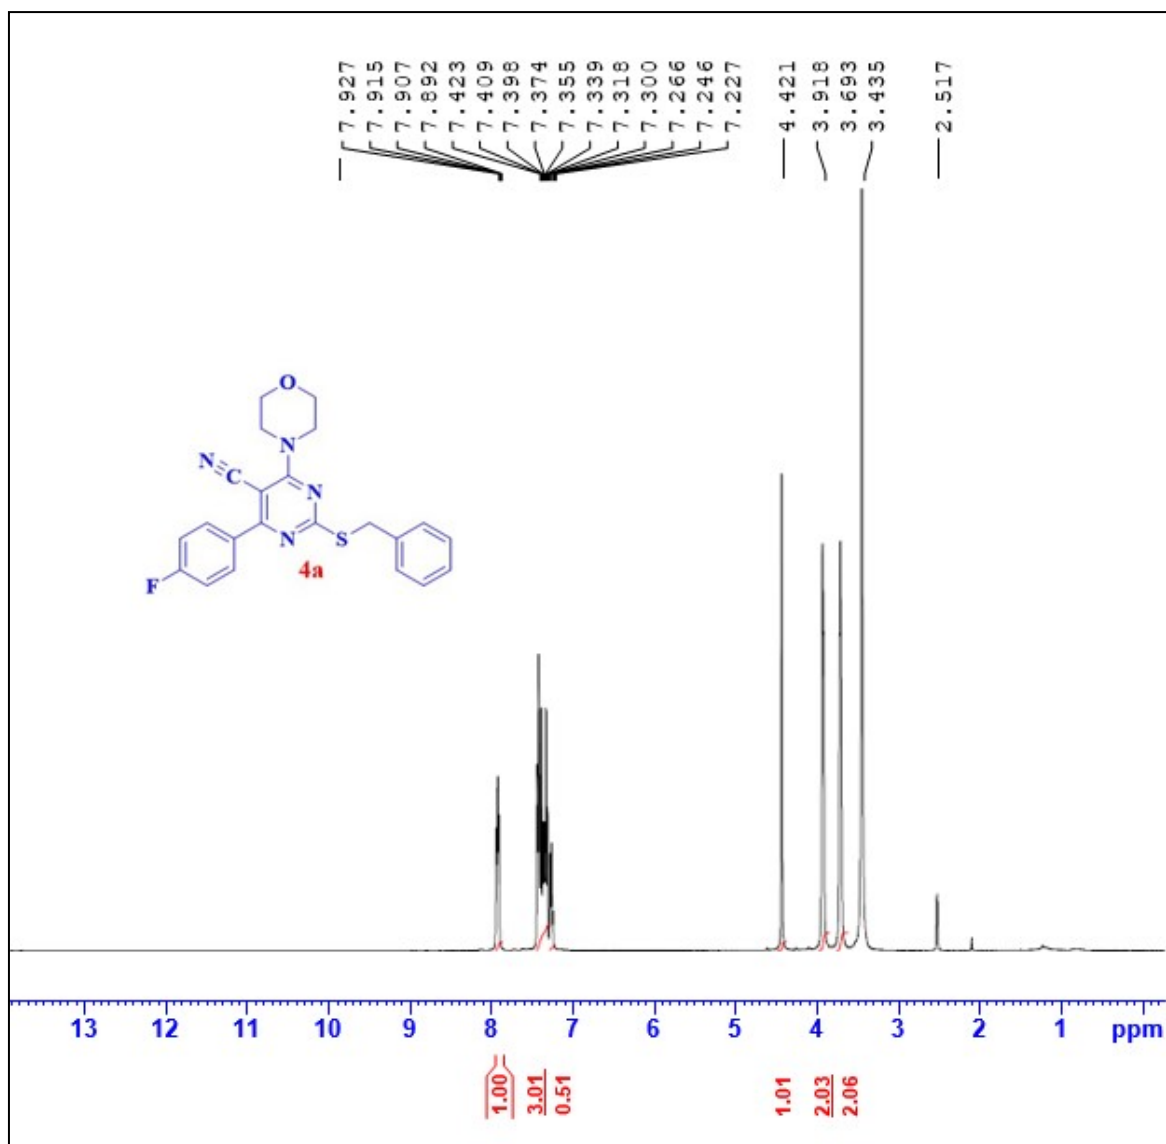

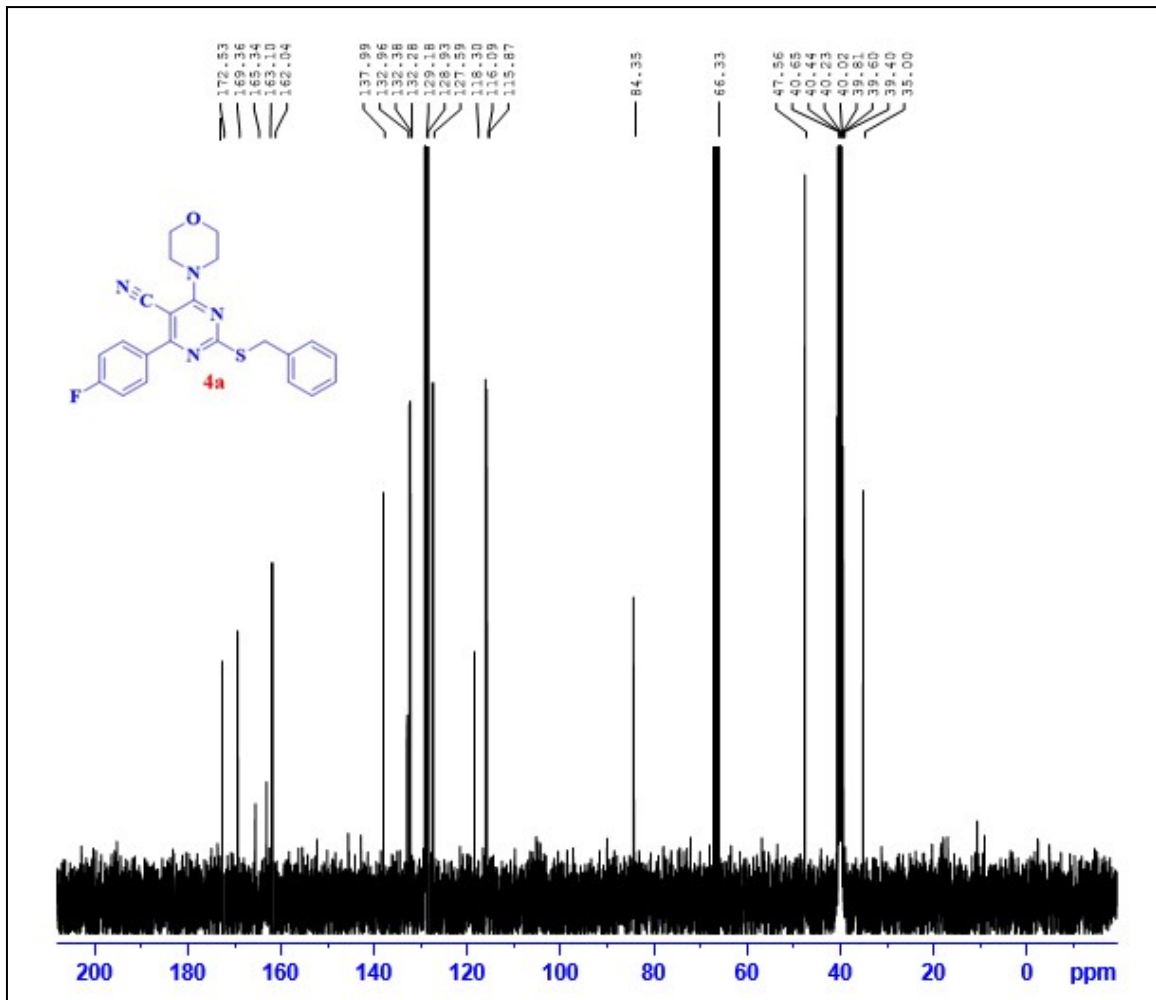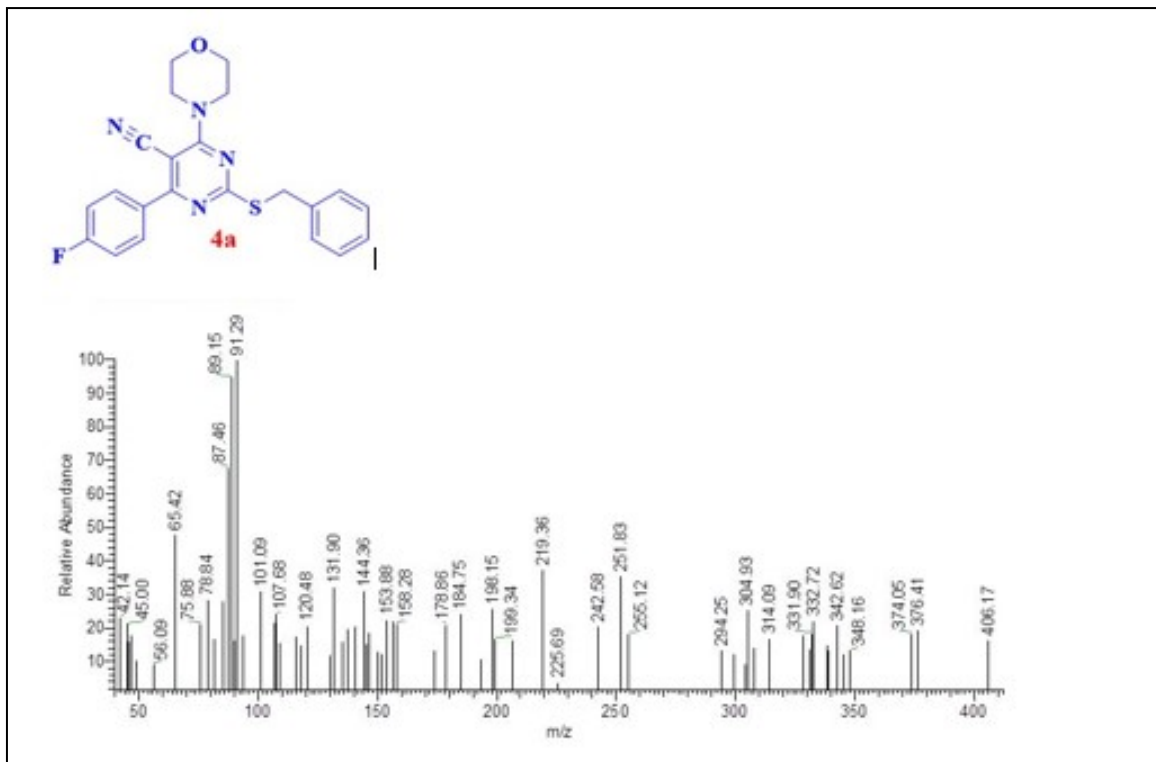



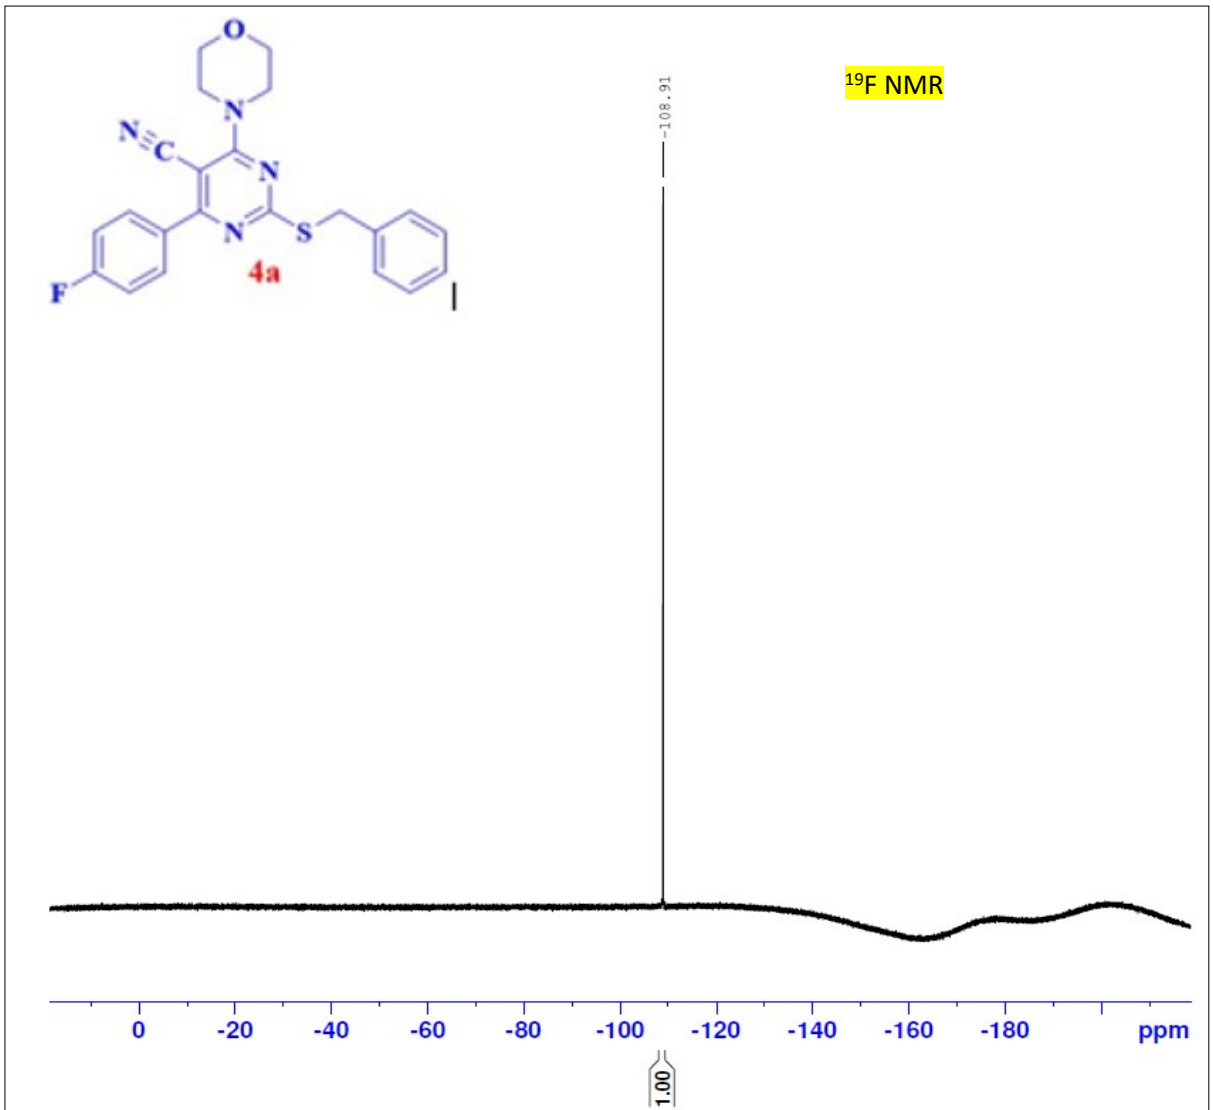

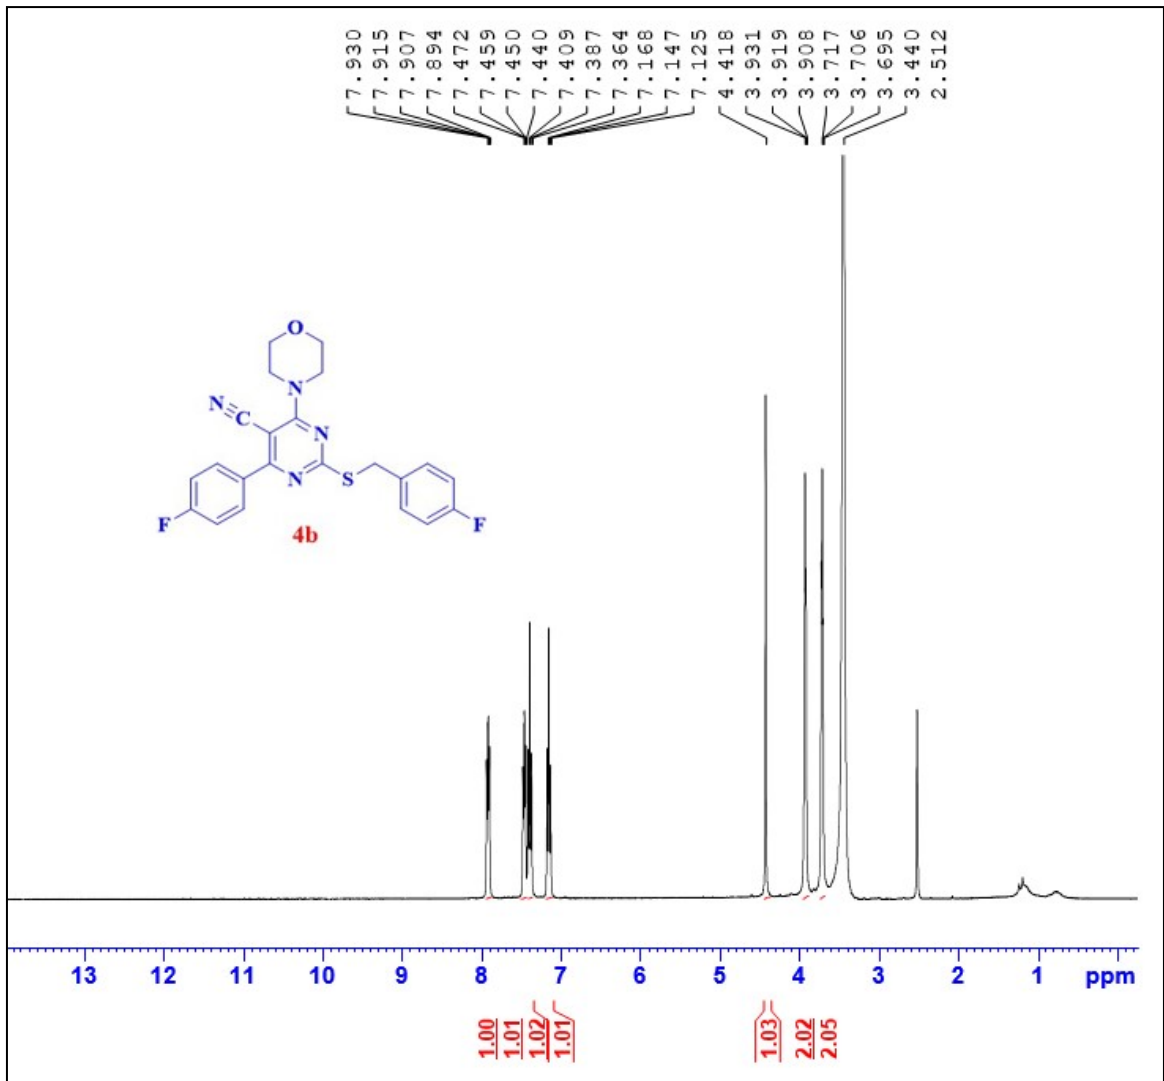

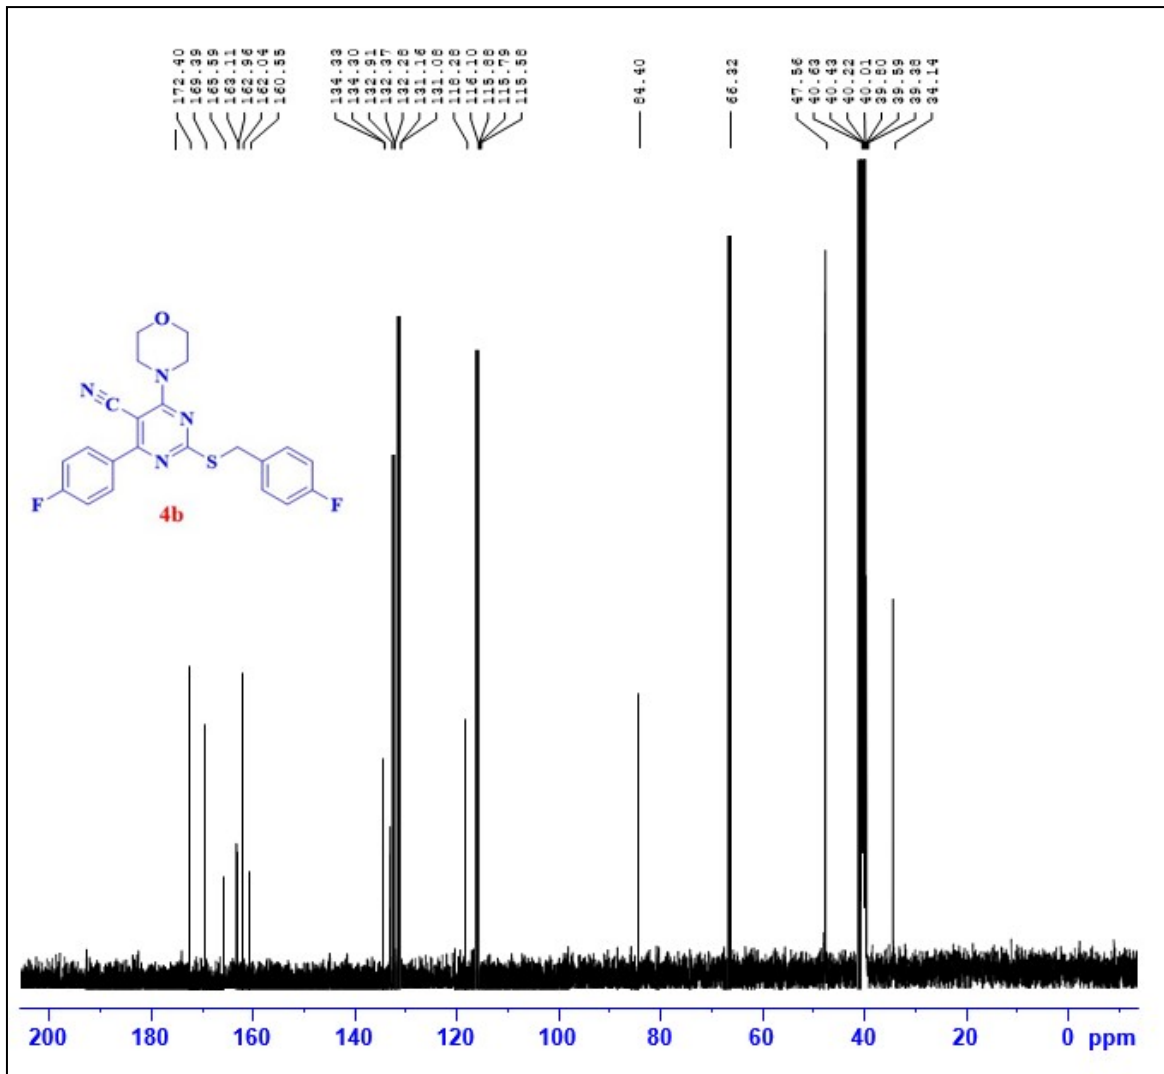

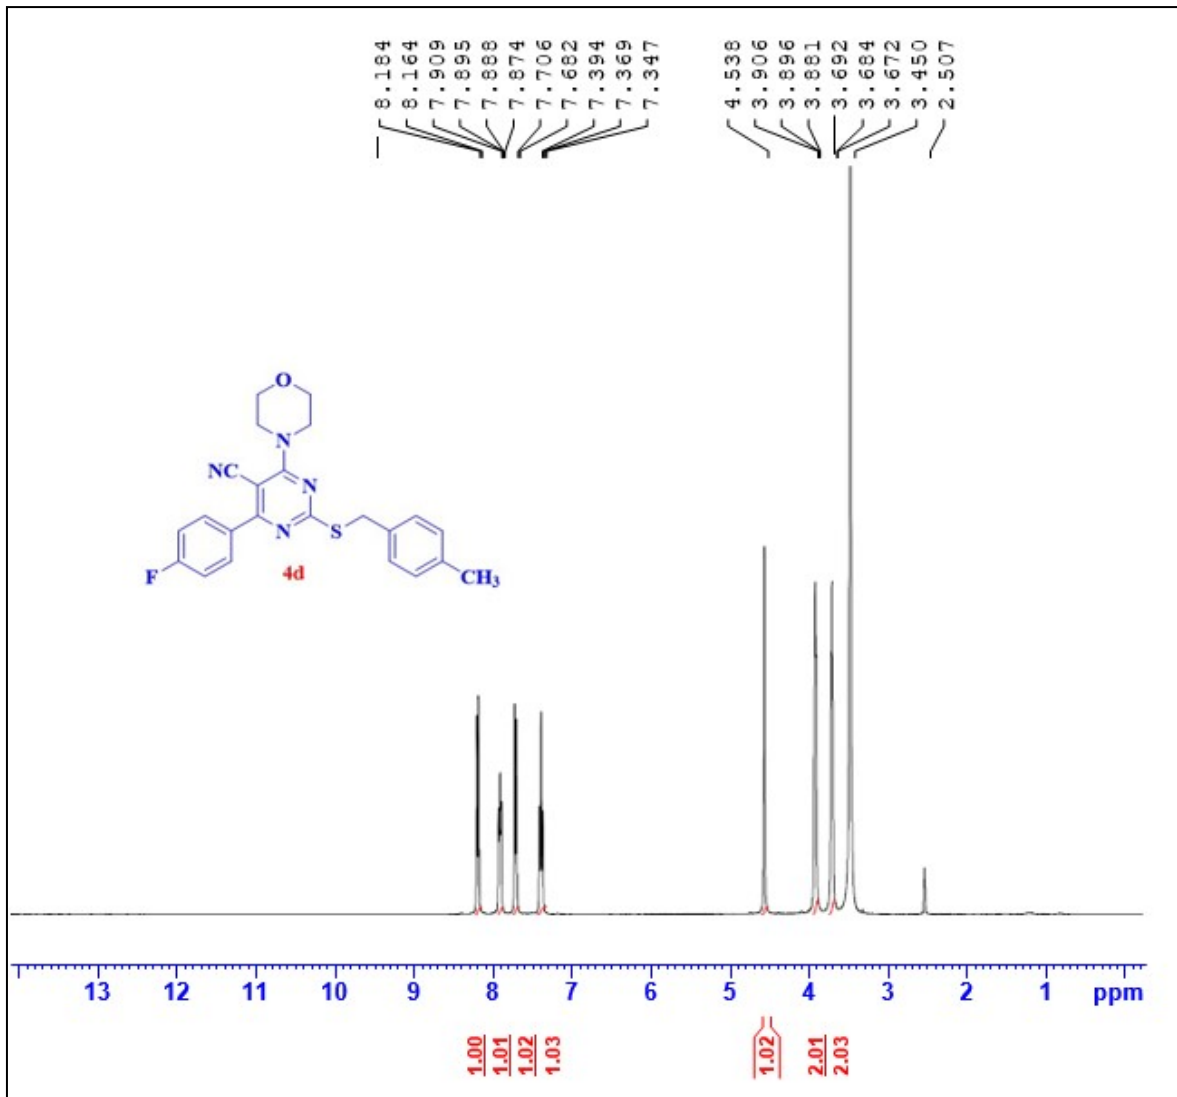

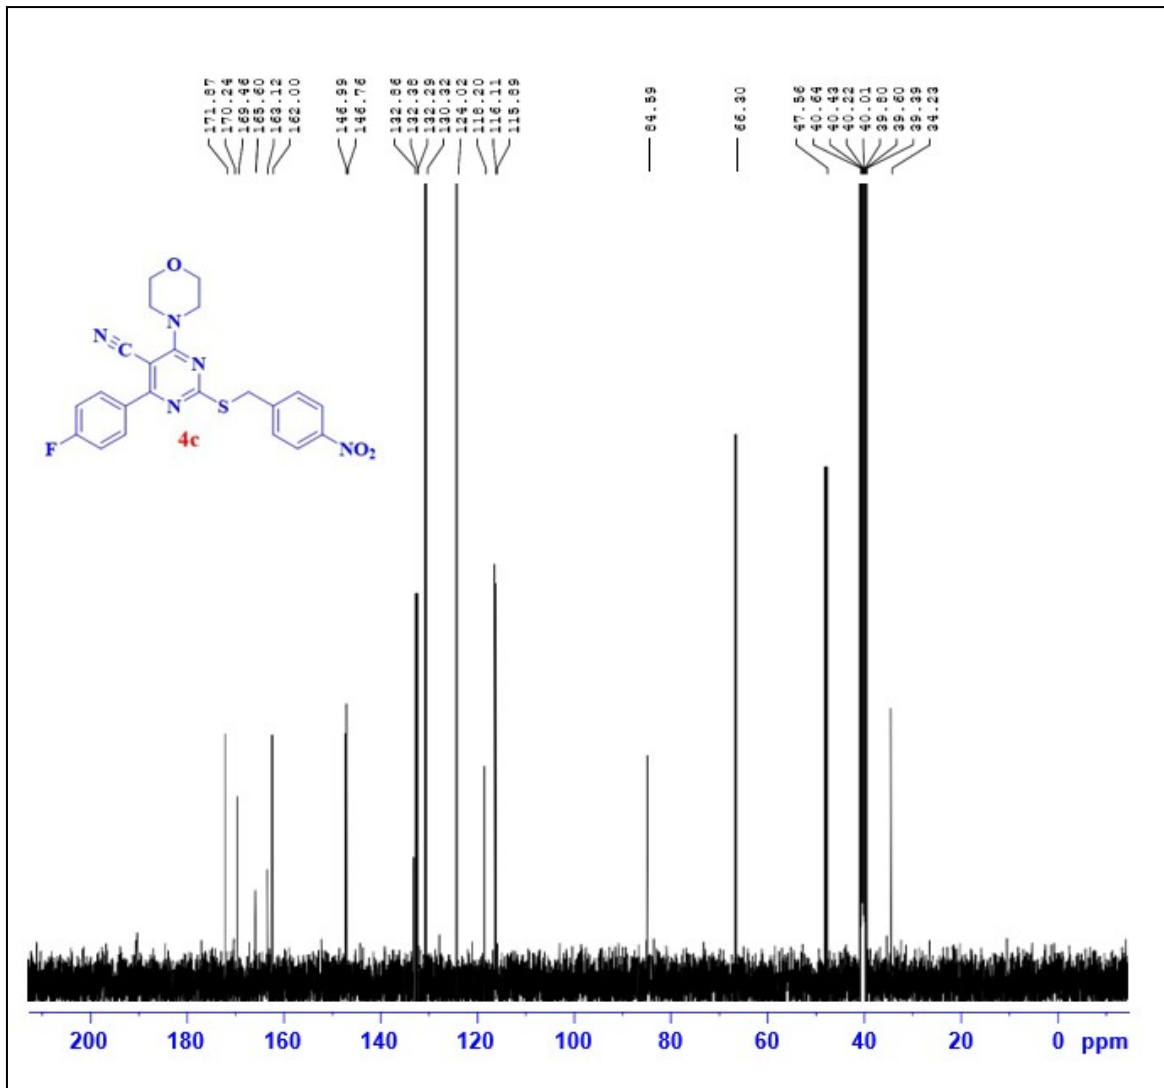

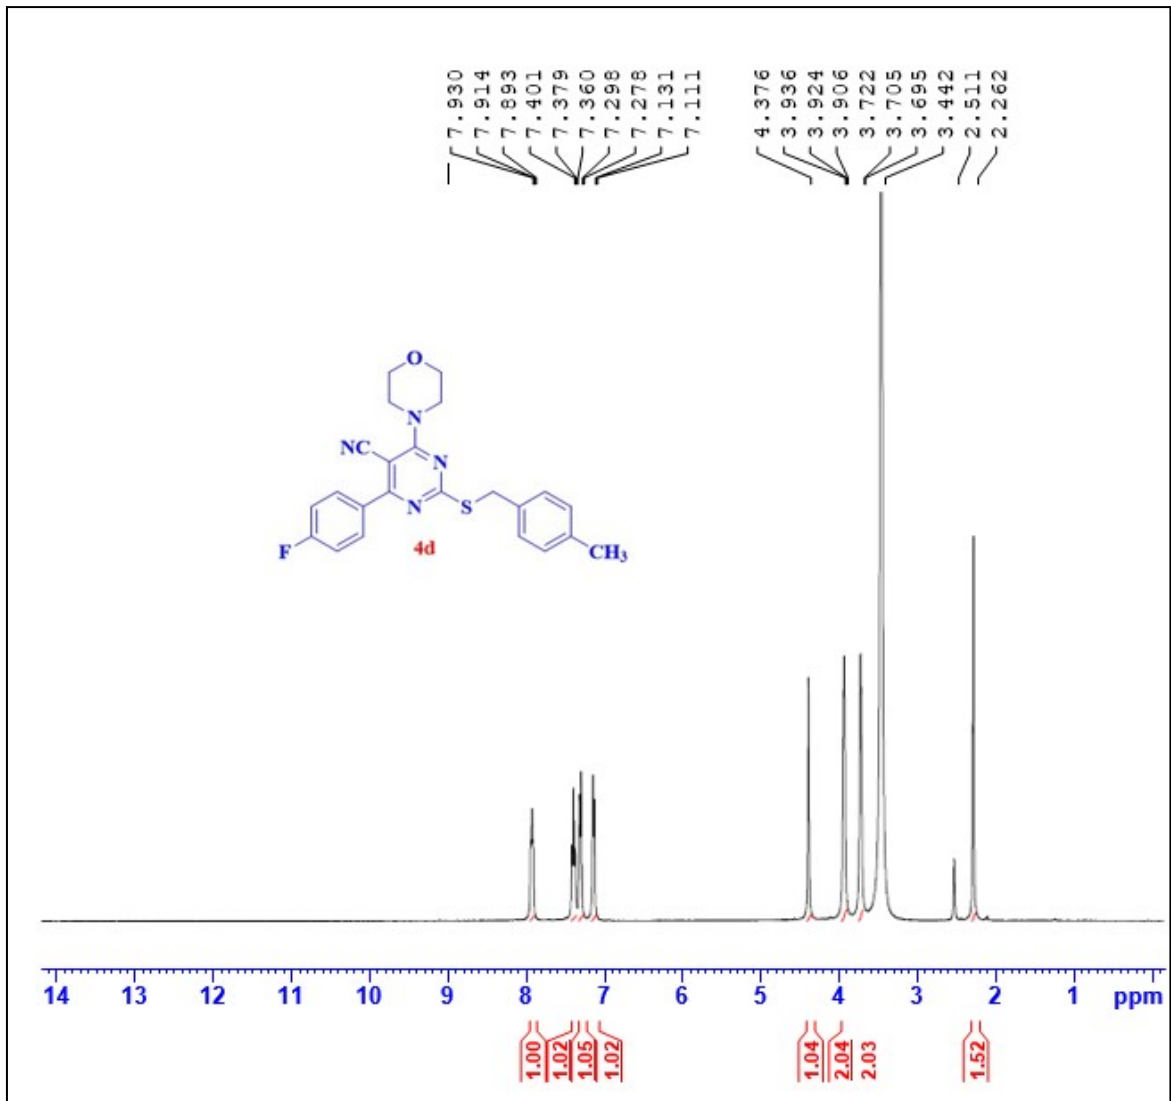



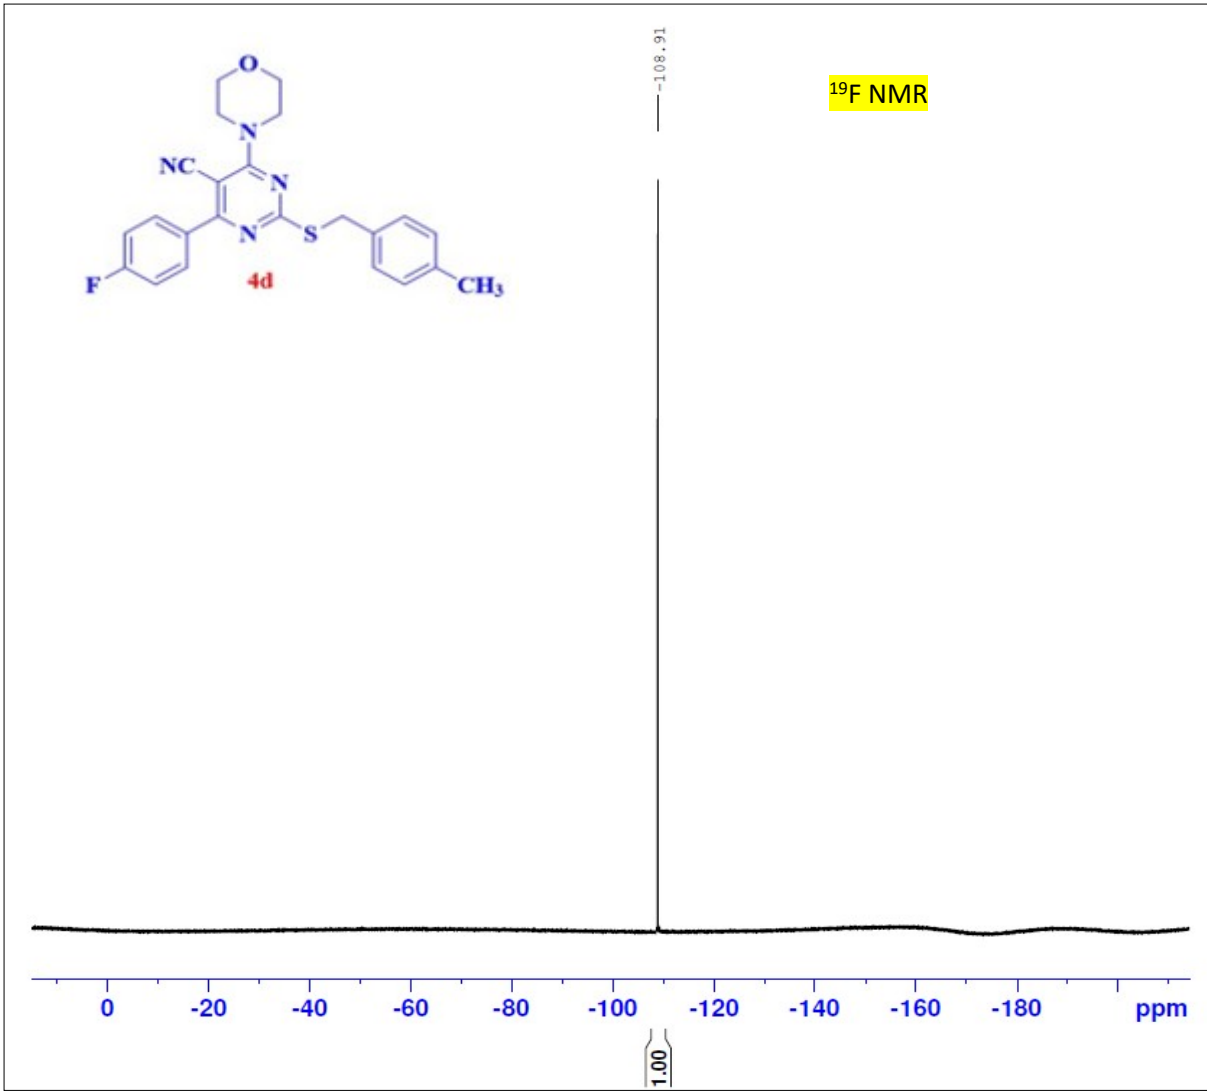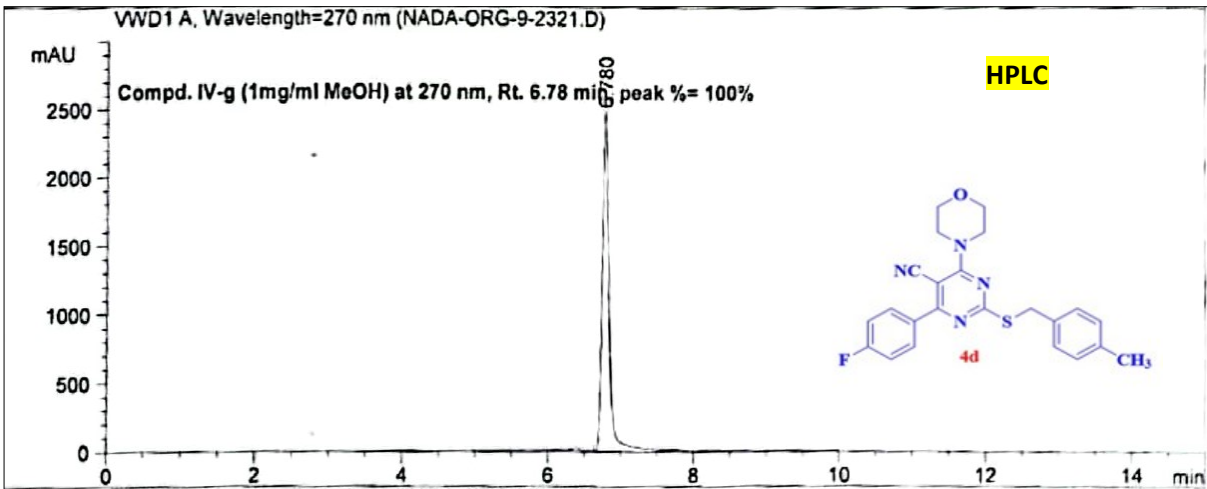



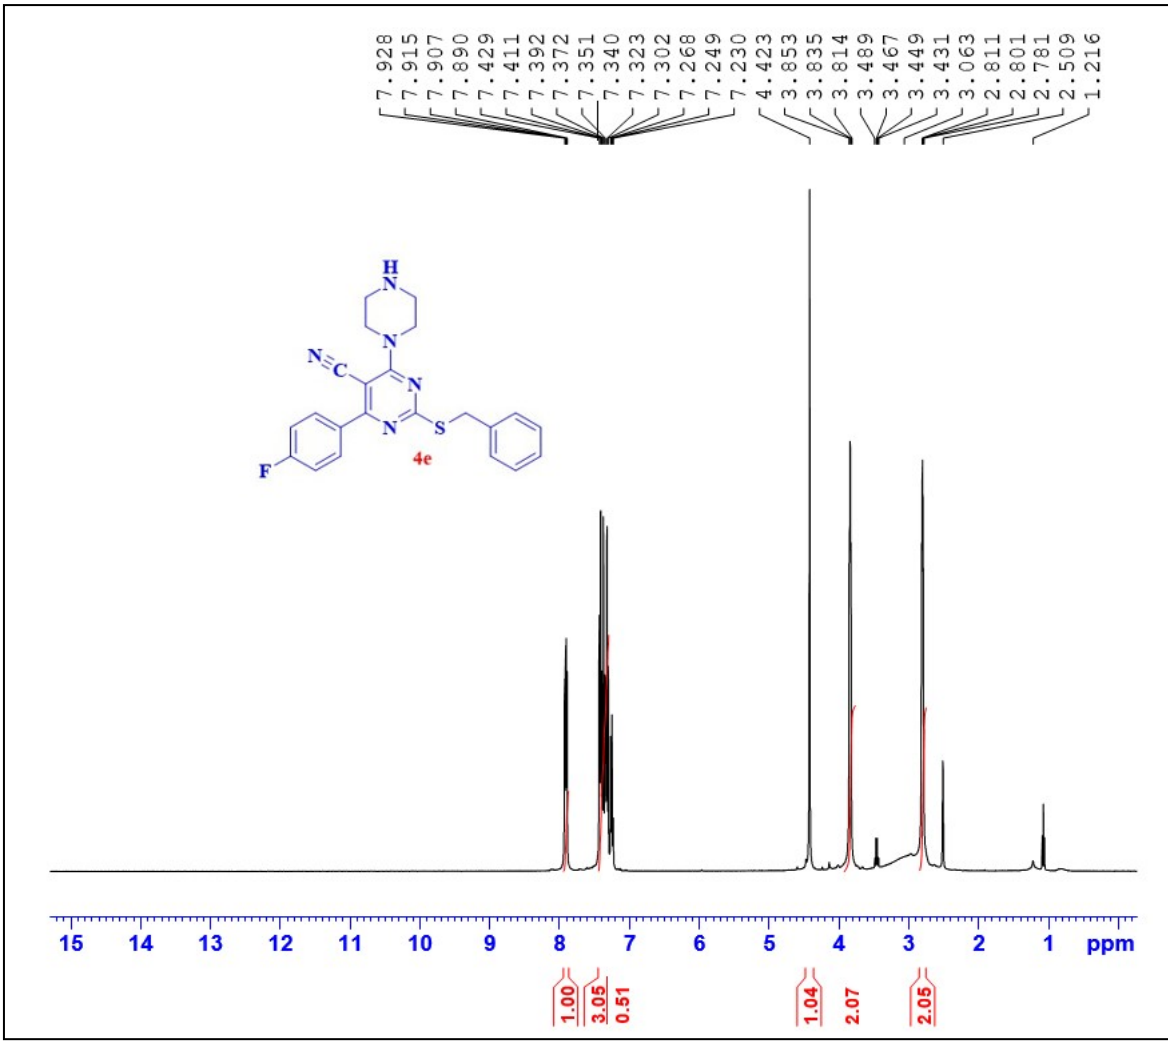

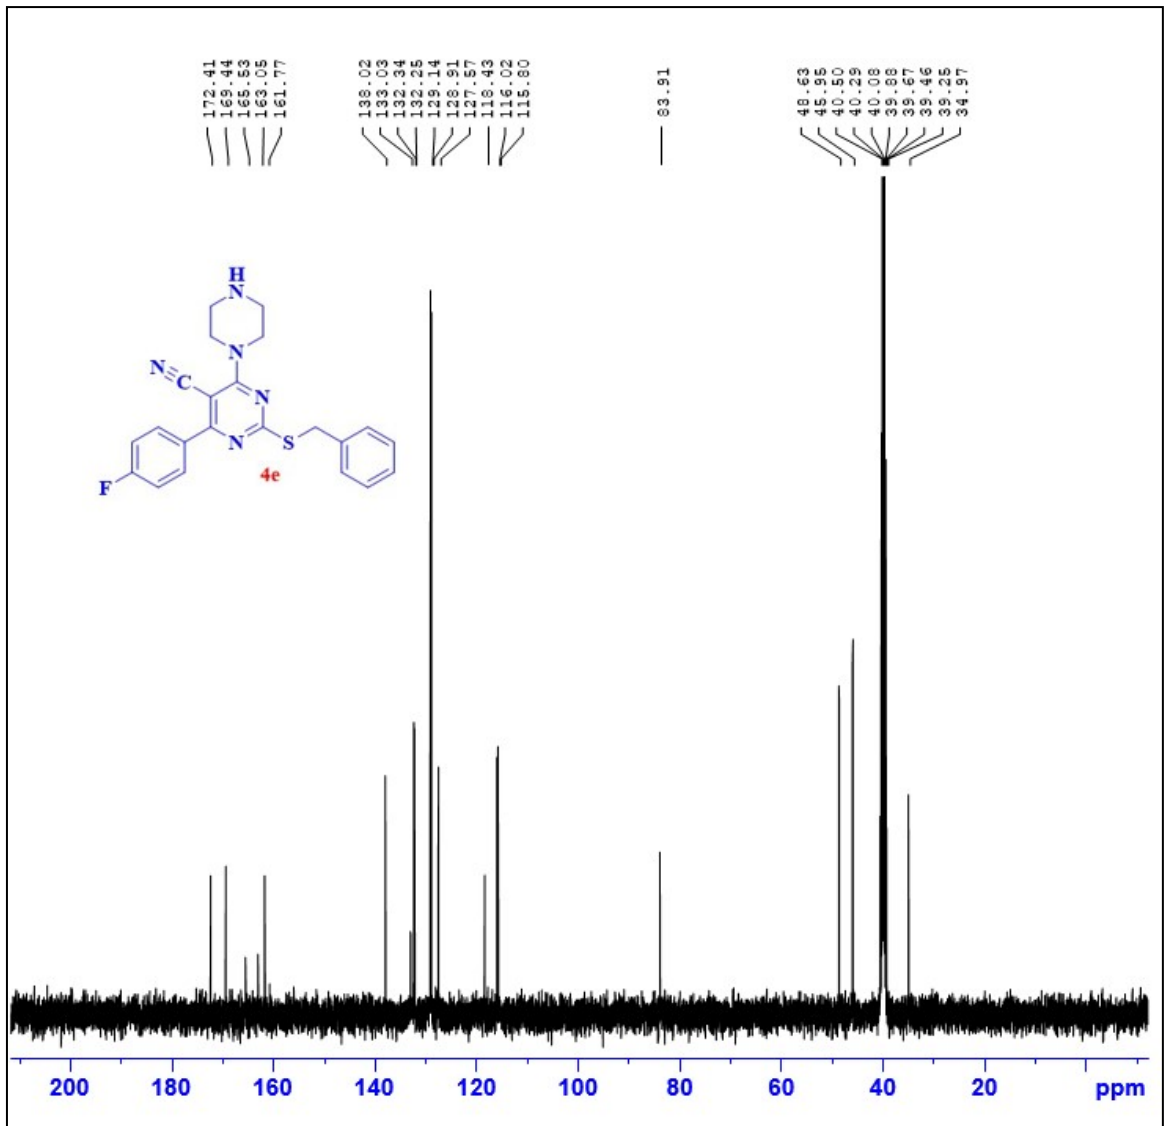

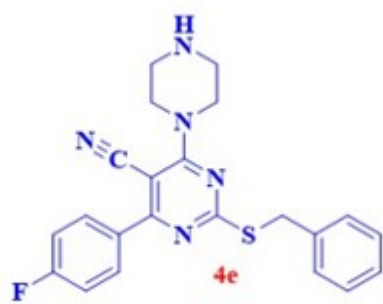

**$^{19}F$  NMR**

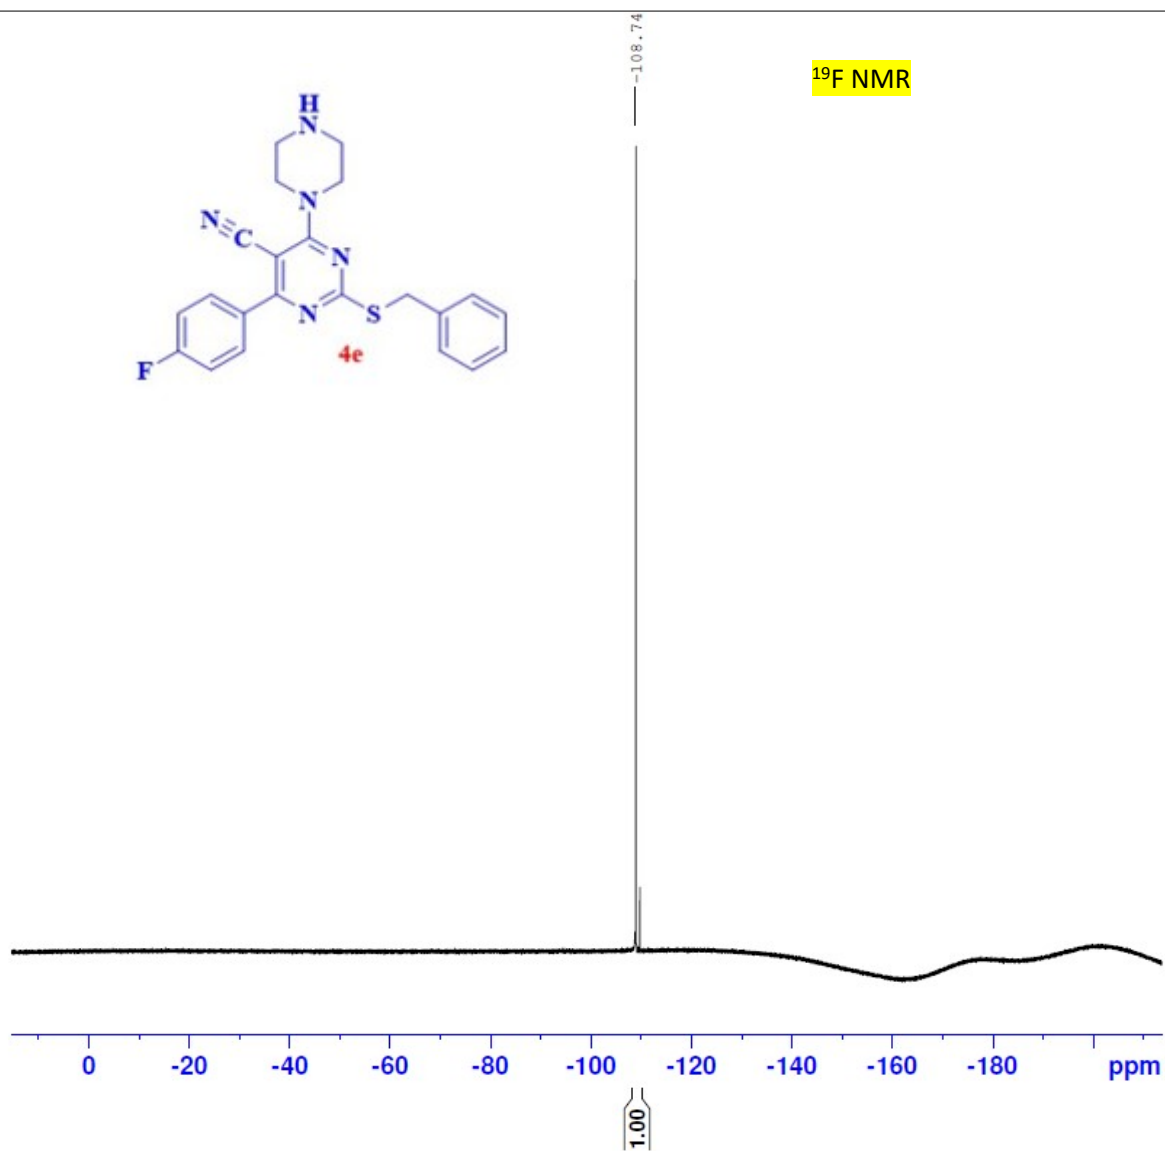

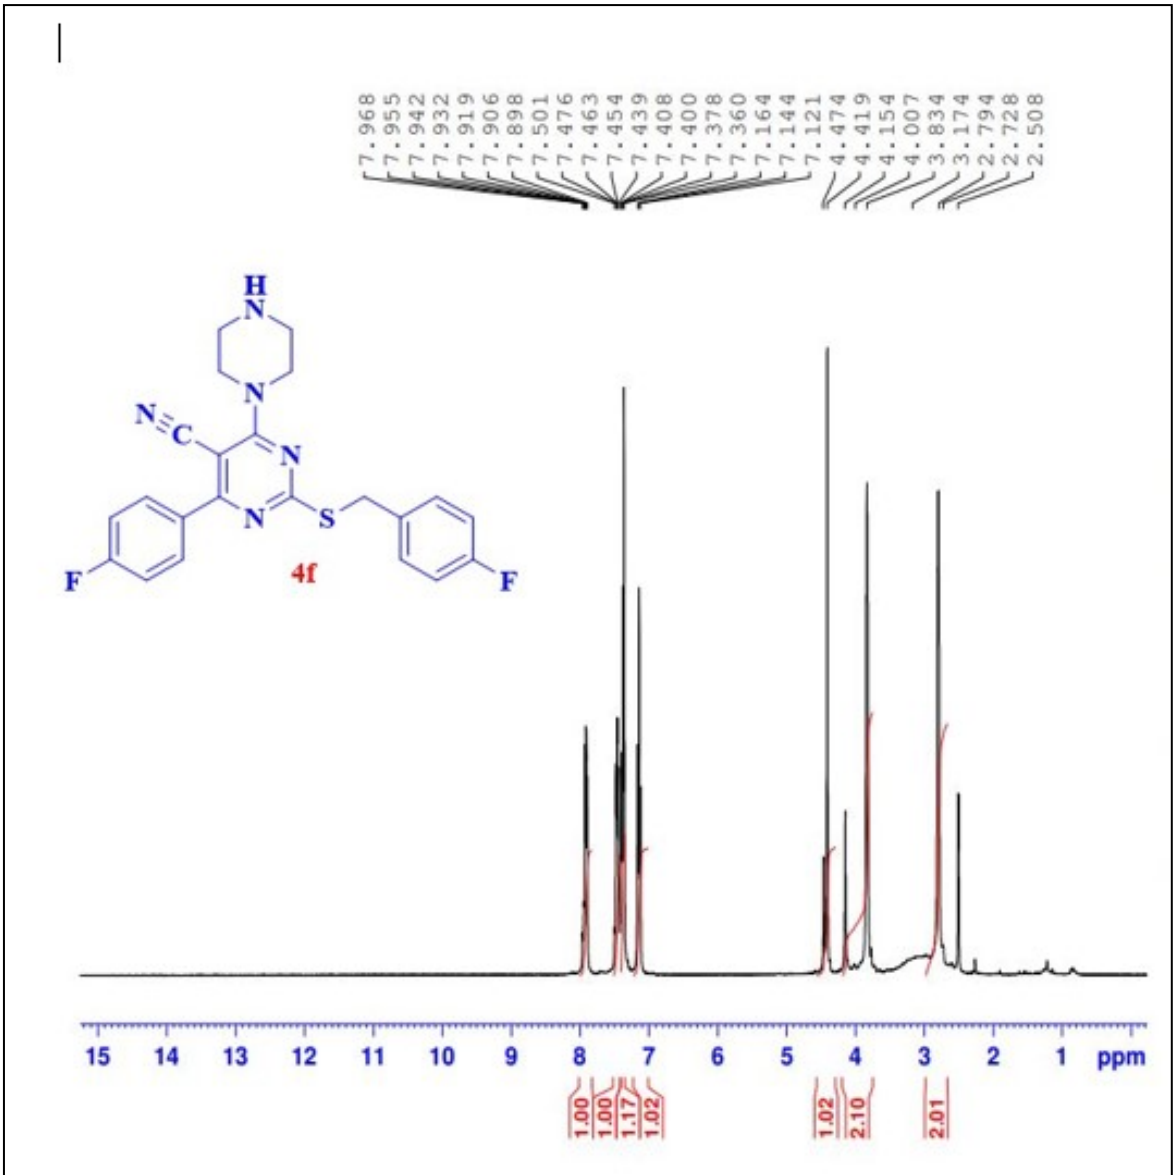

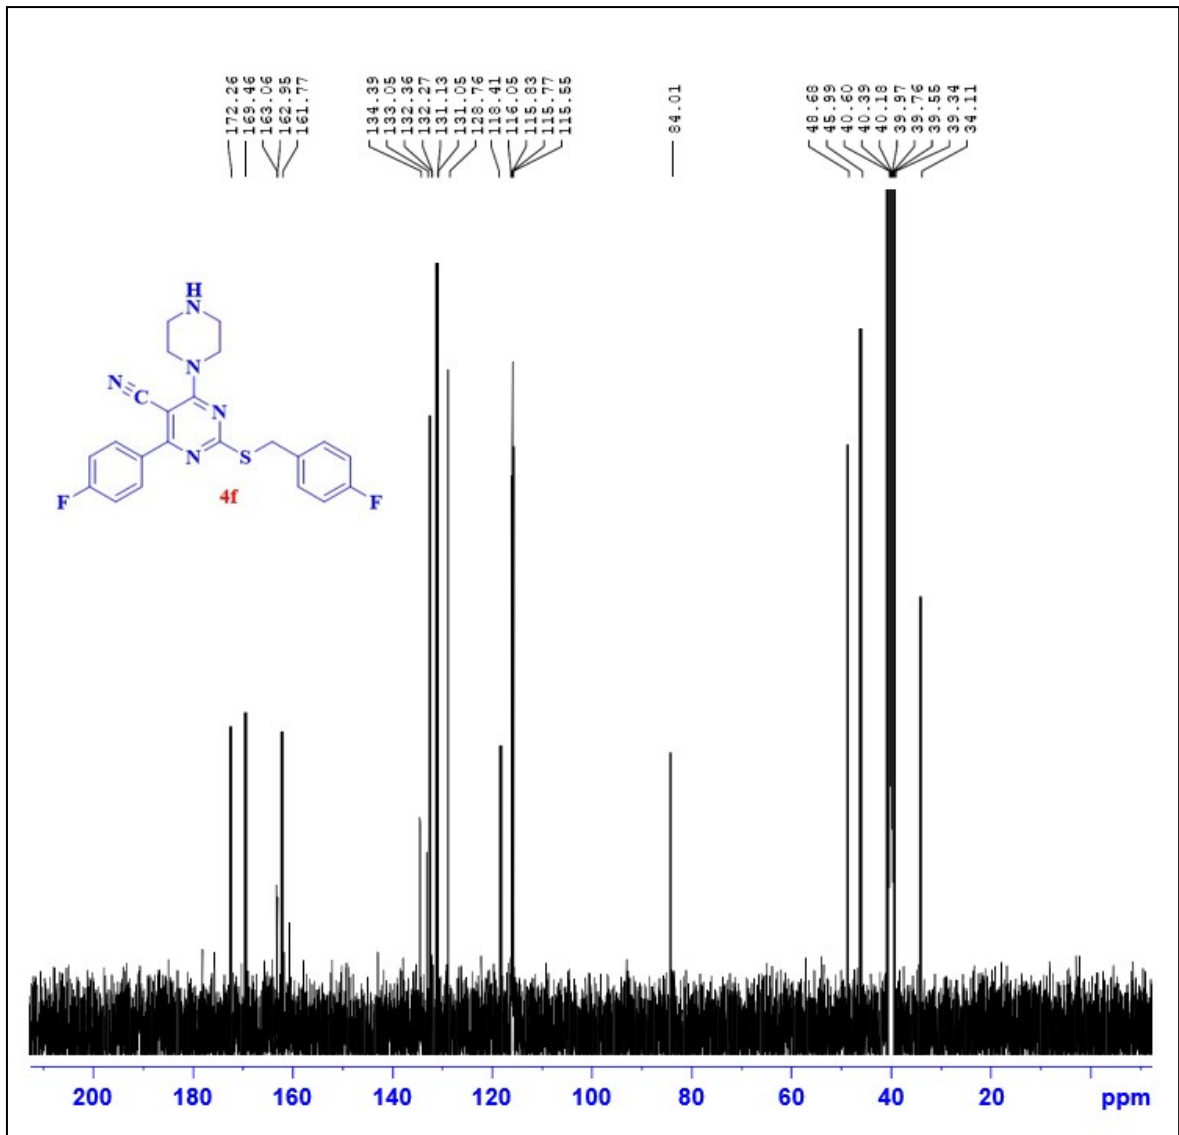

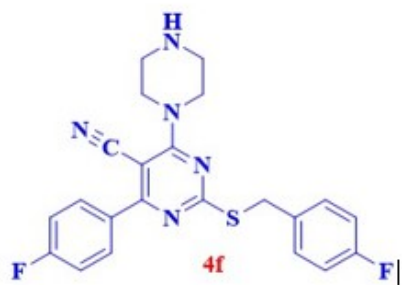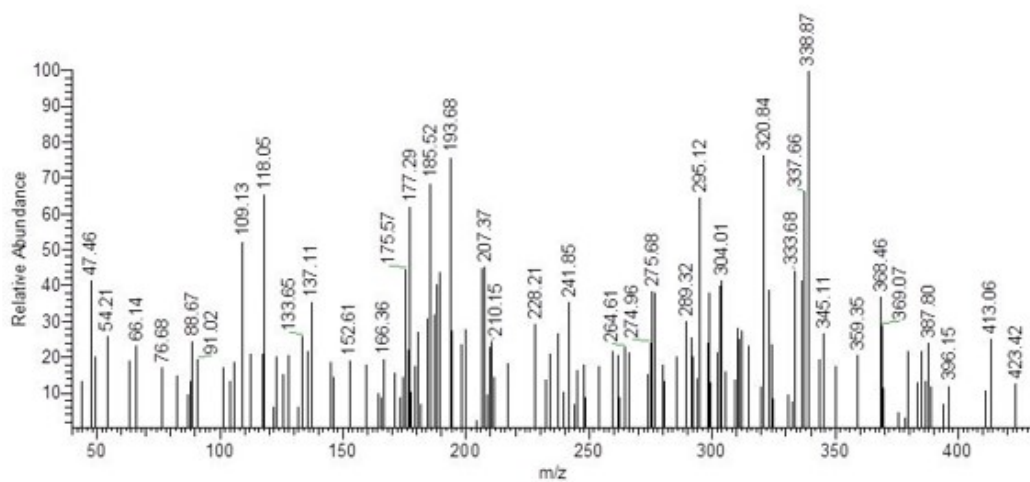

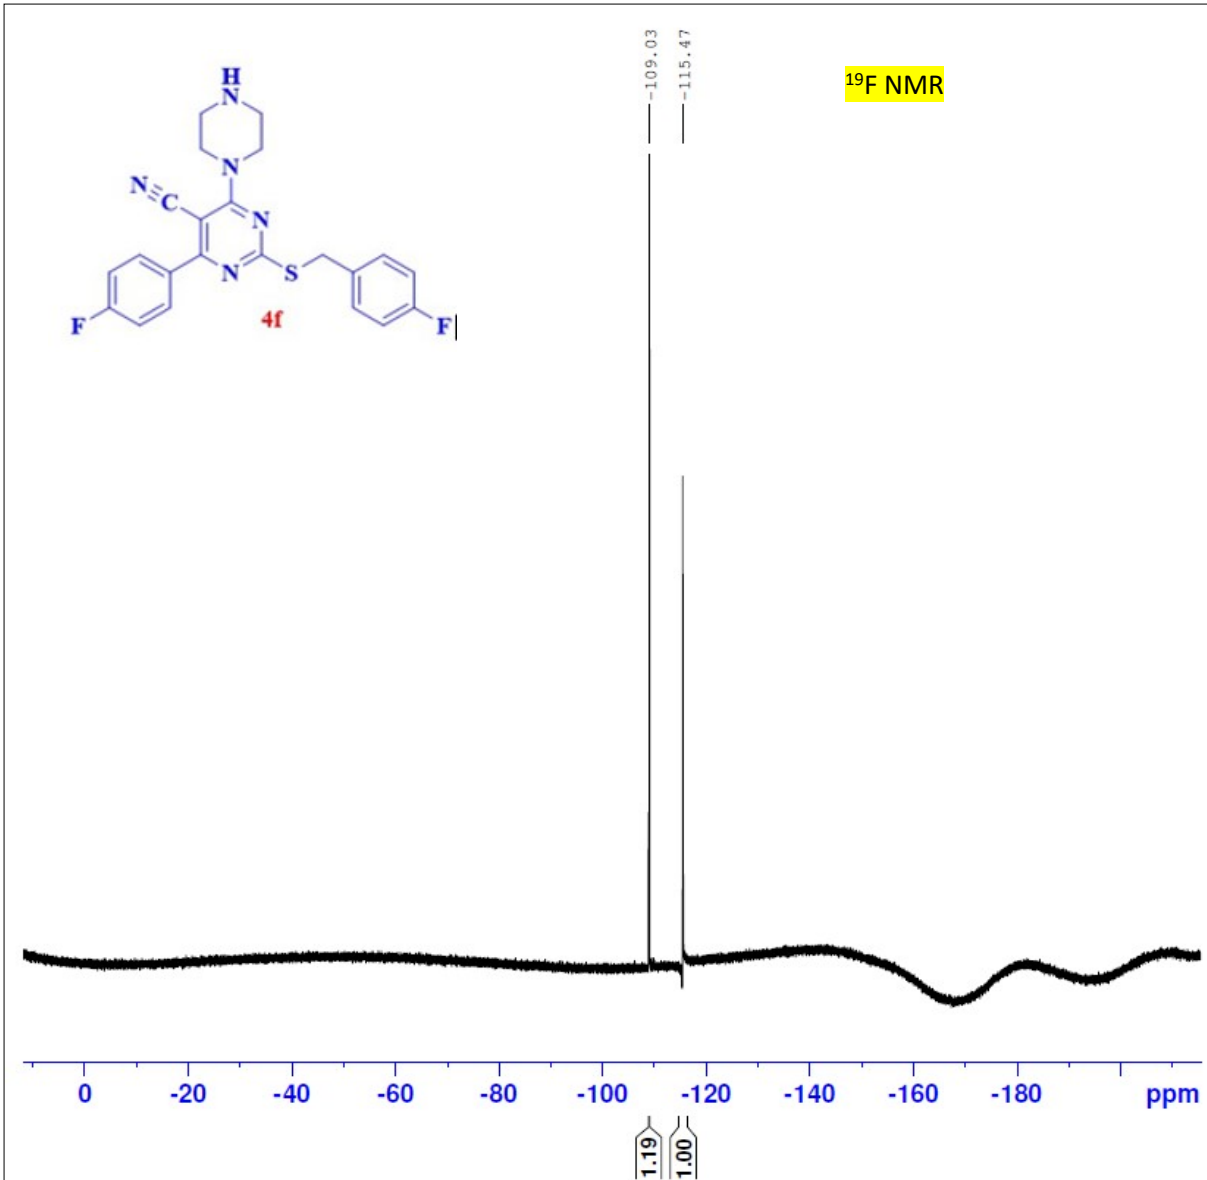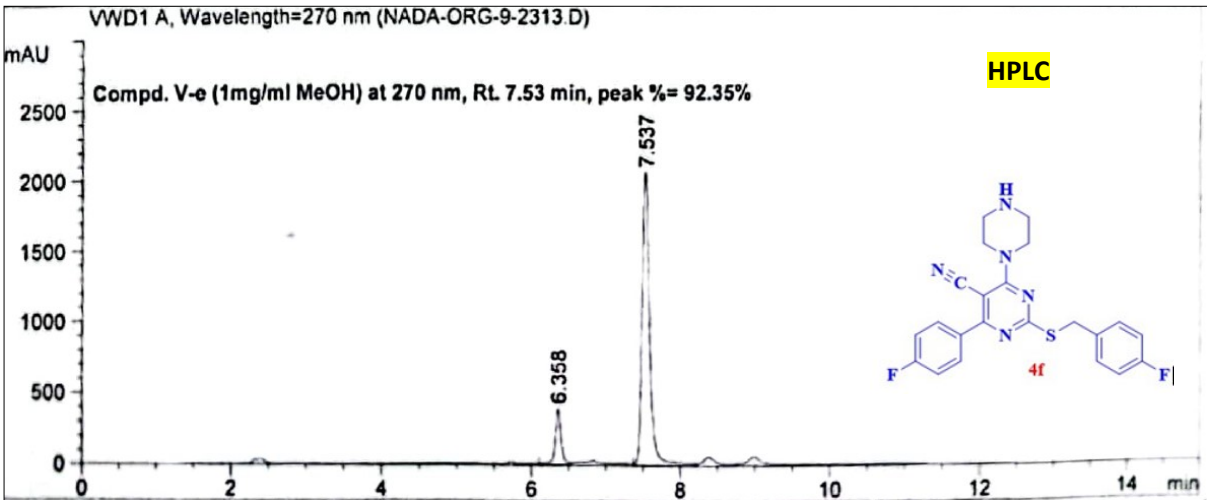

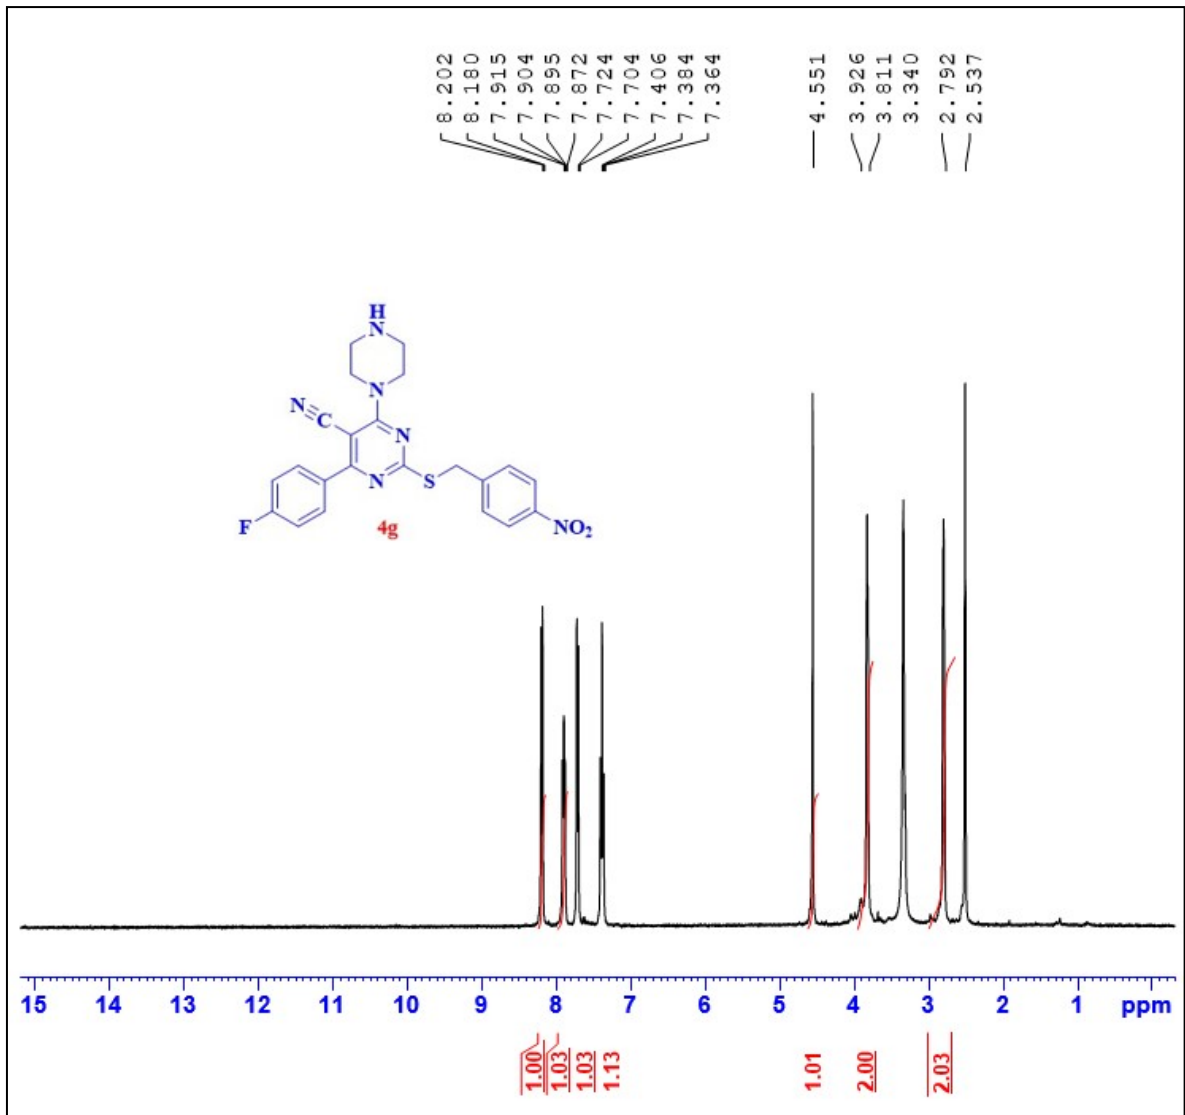



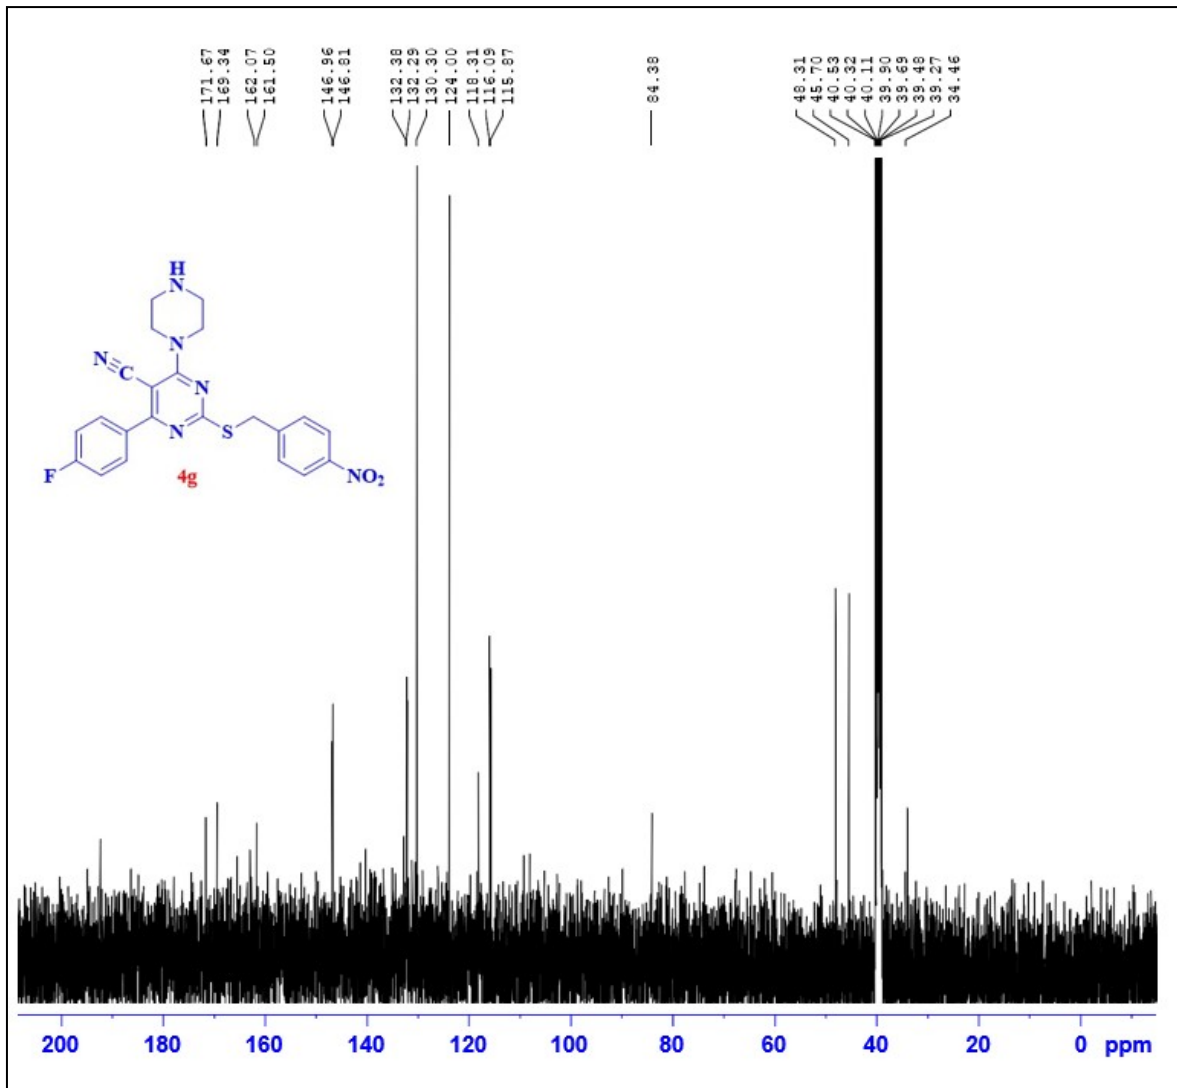

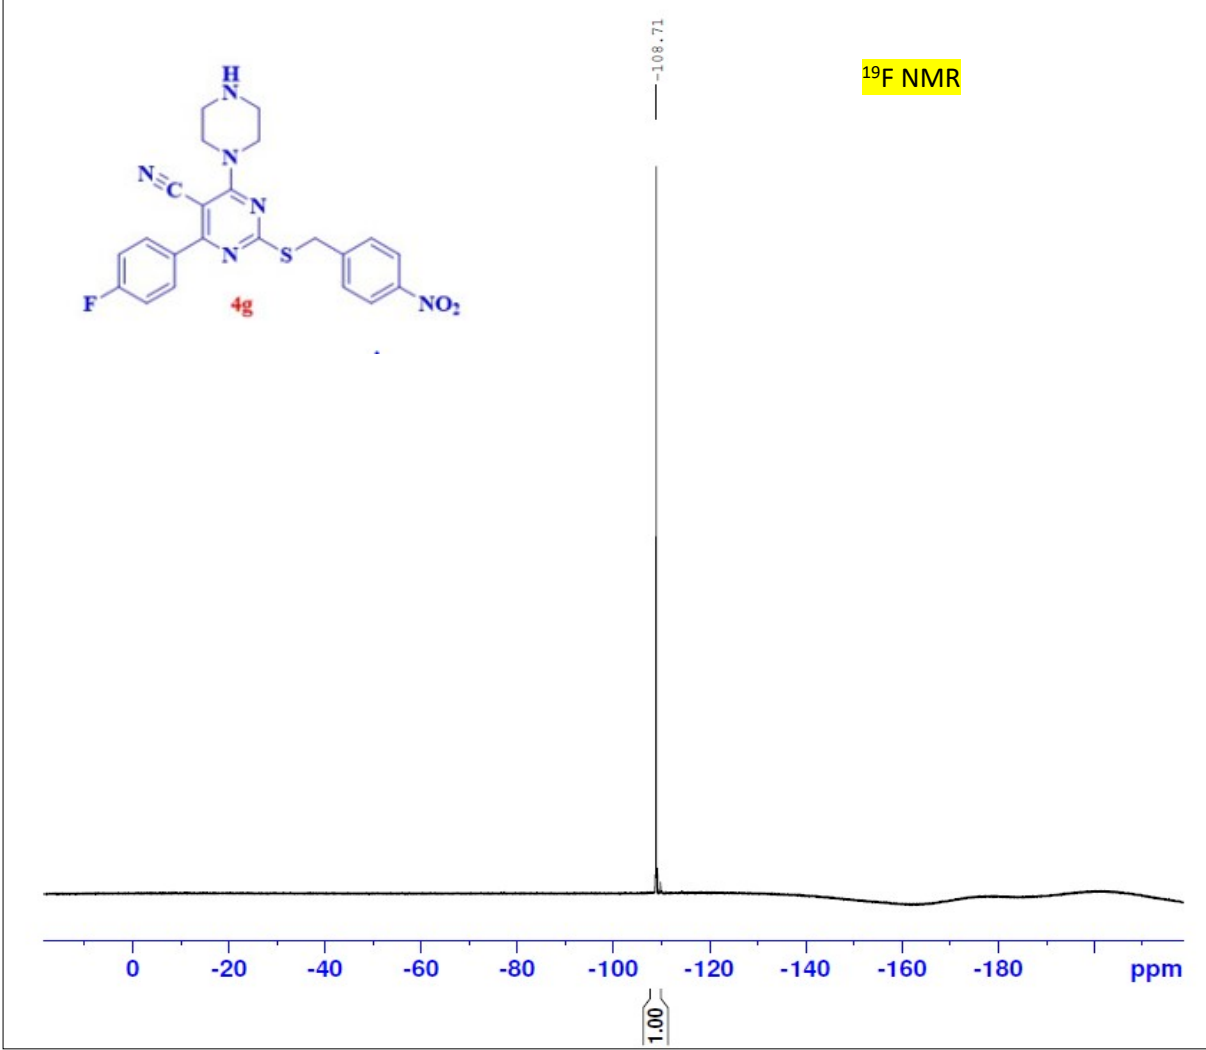

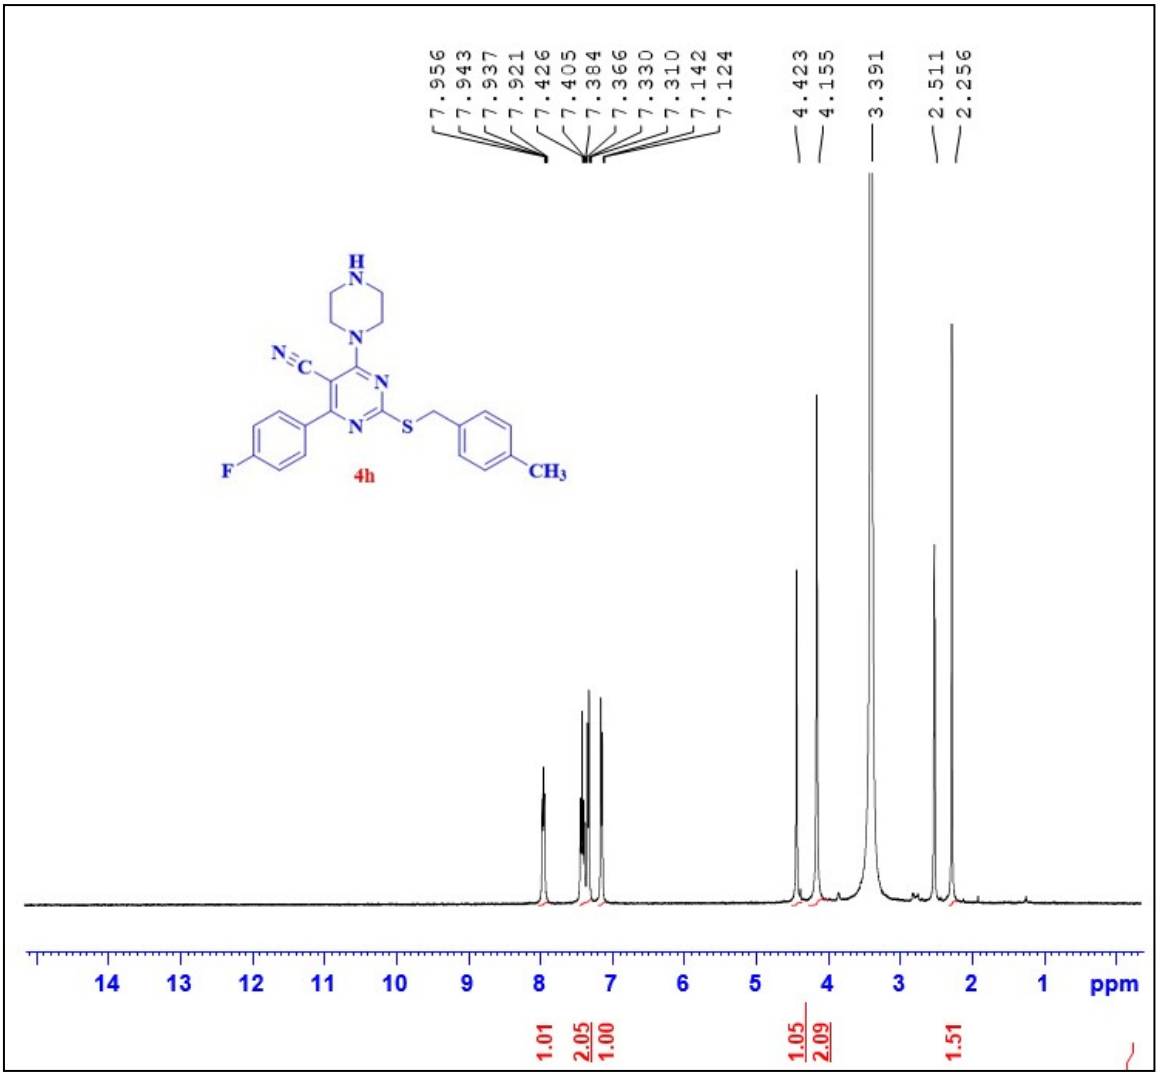

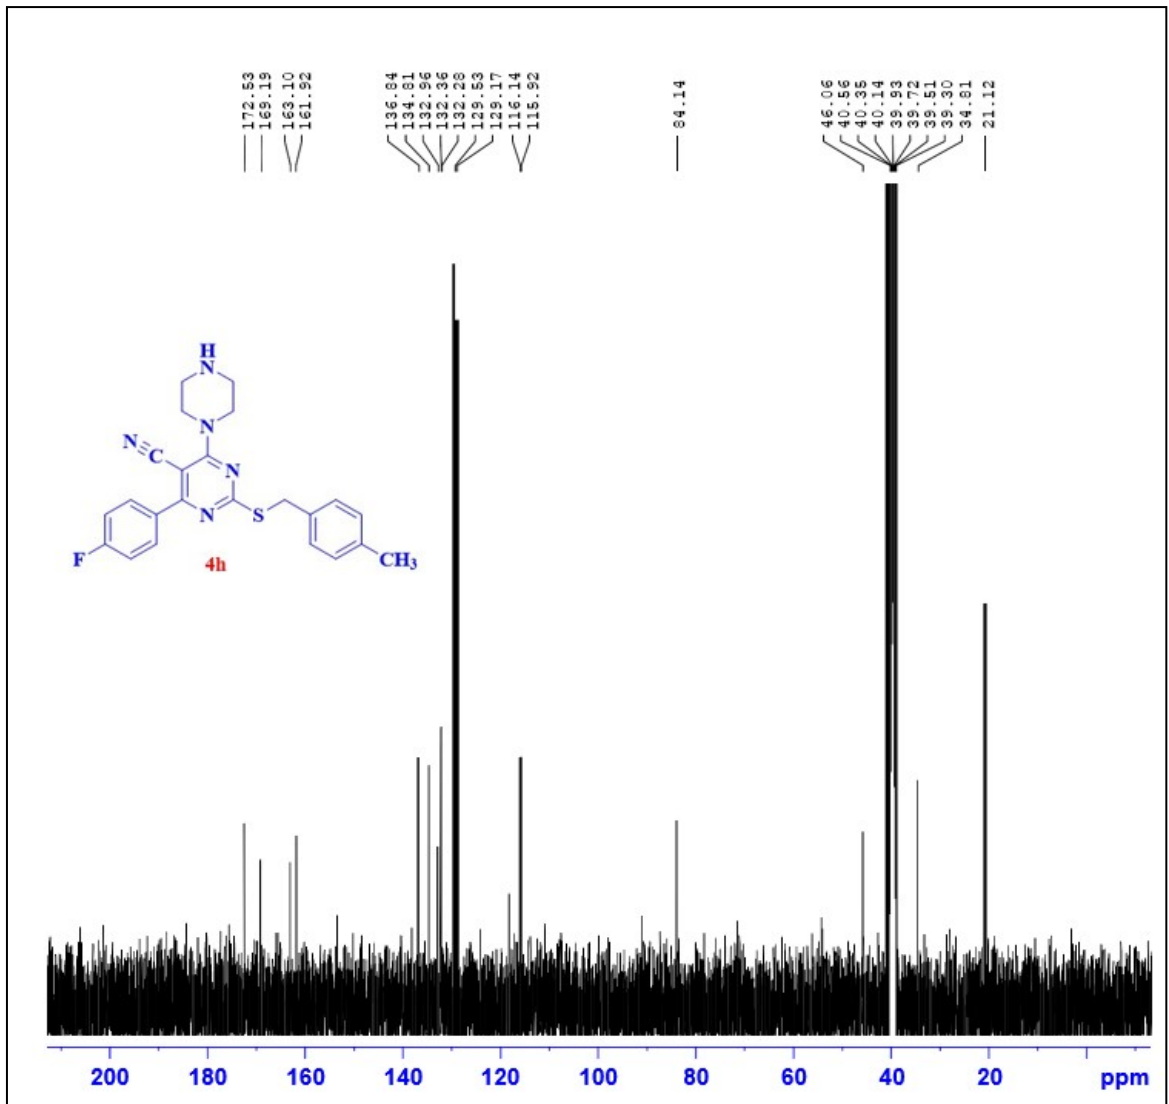

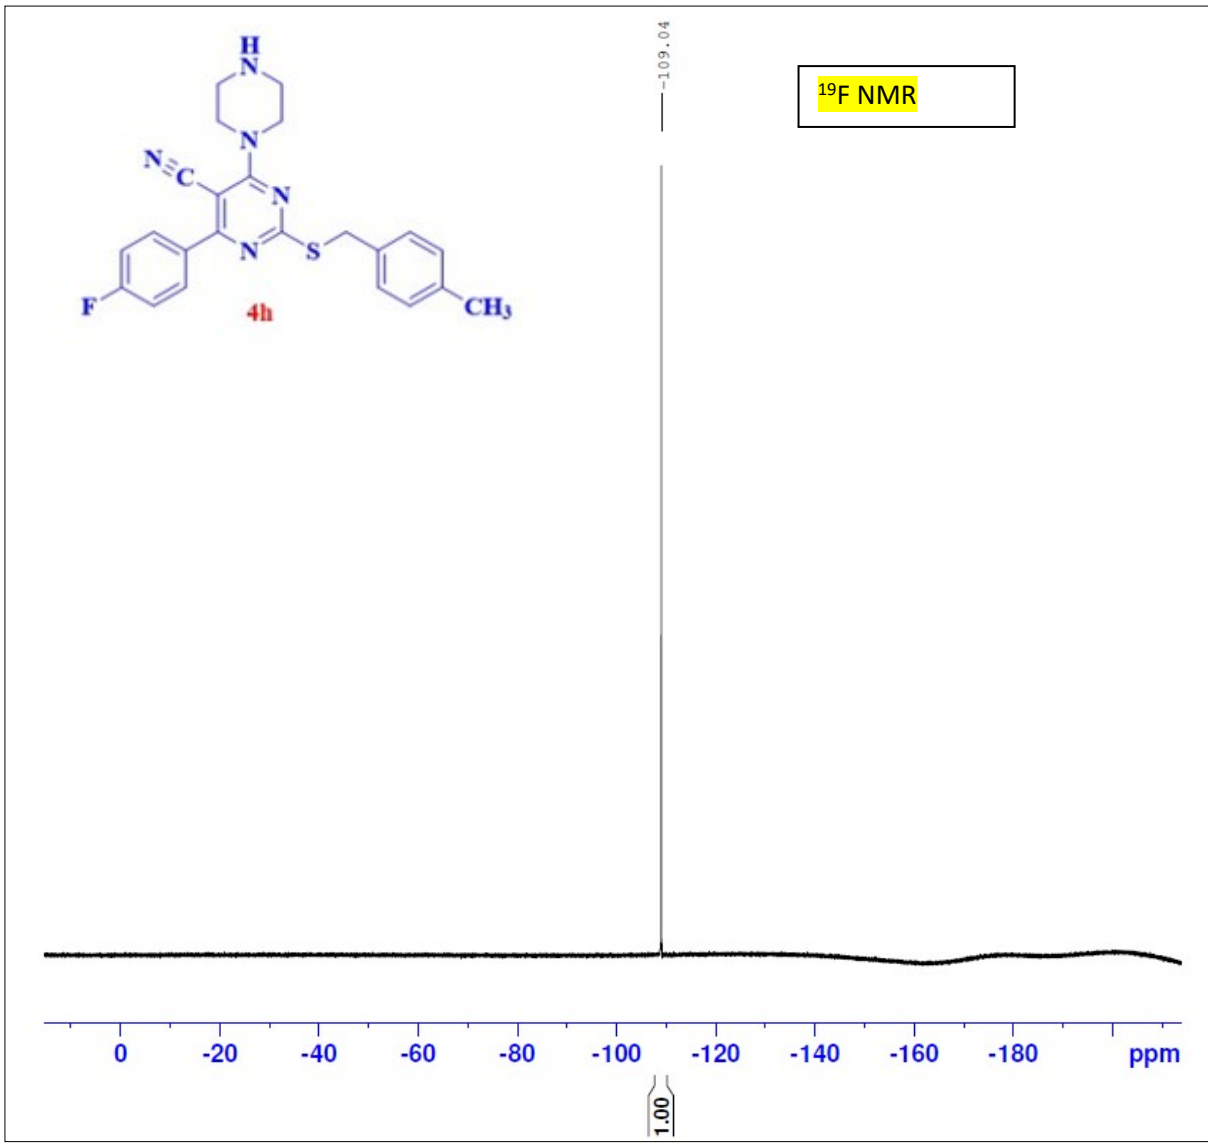

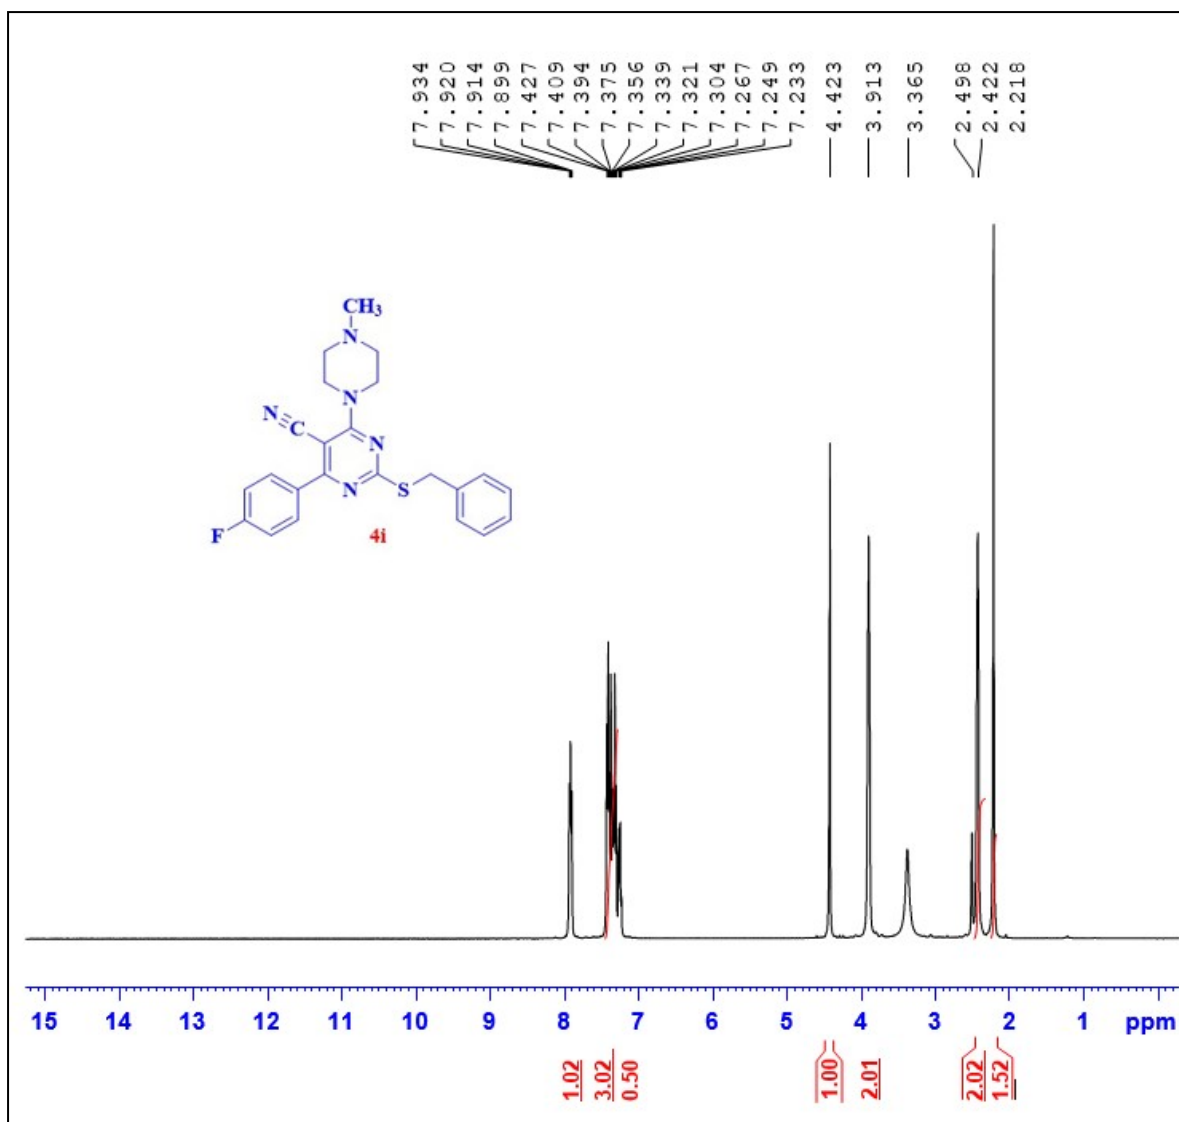

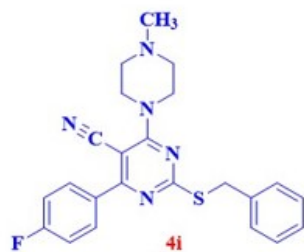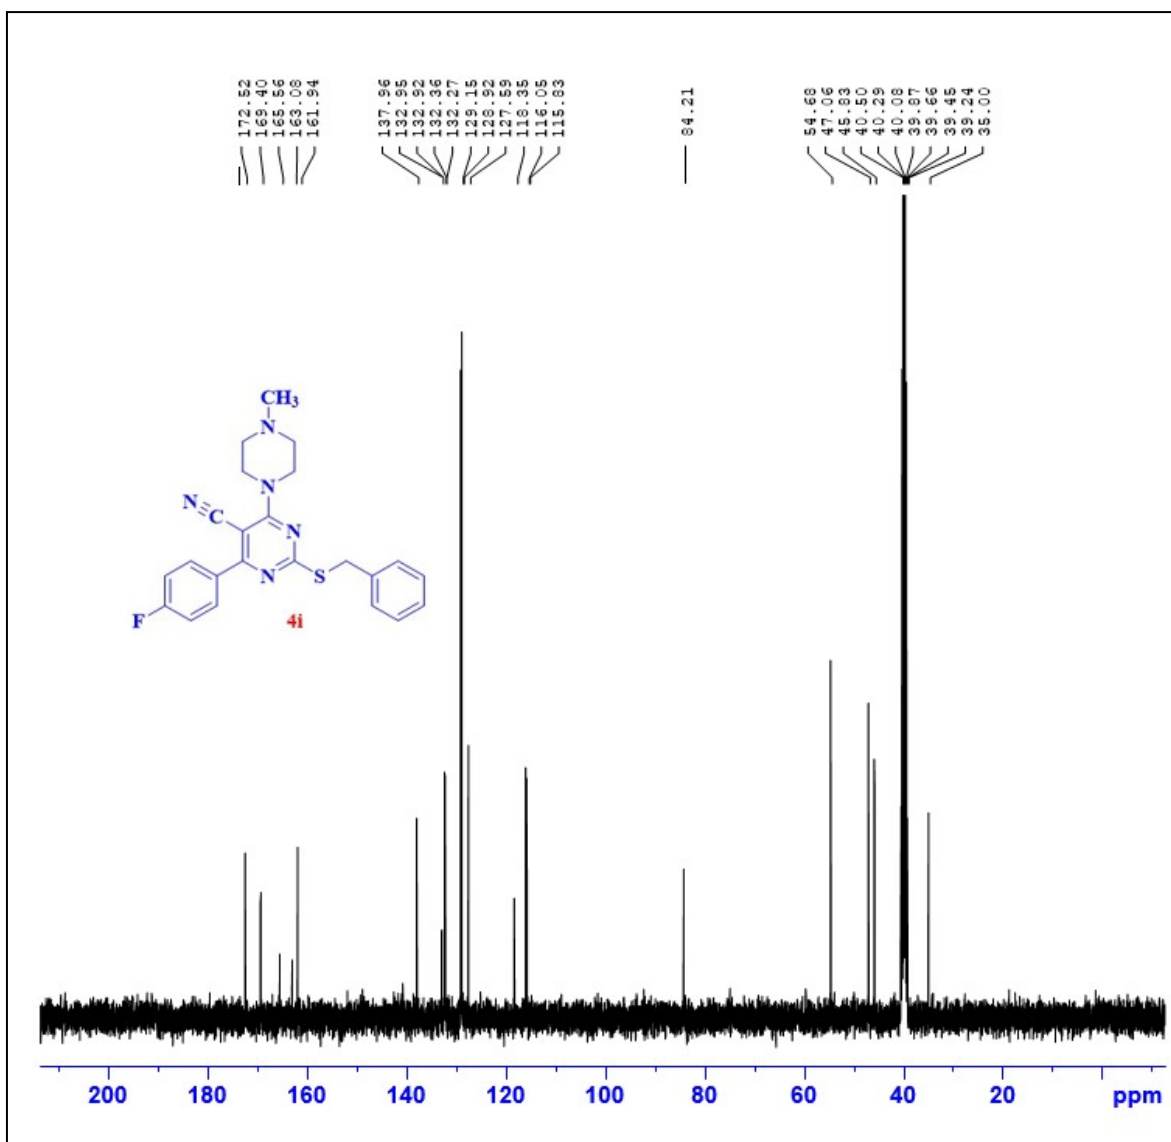

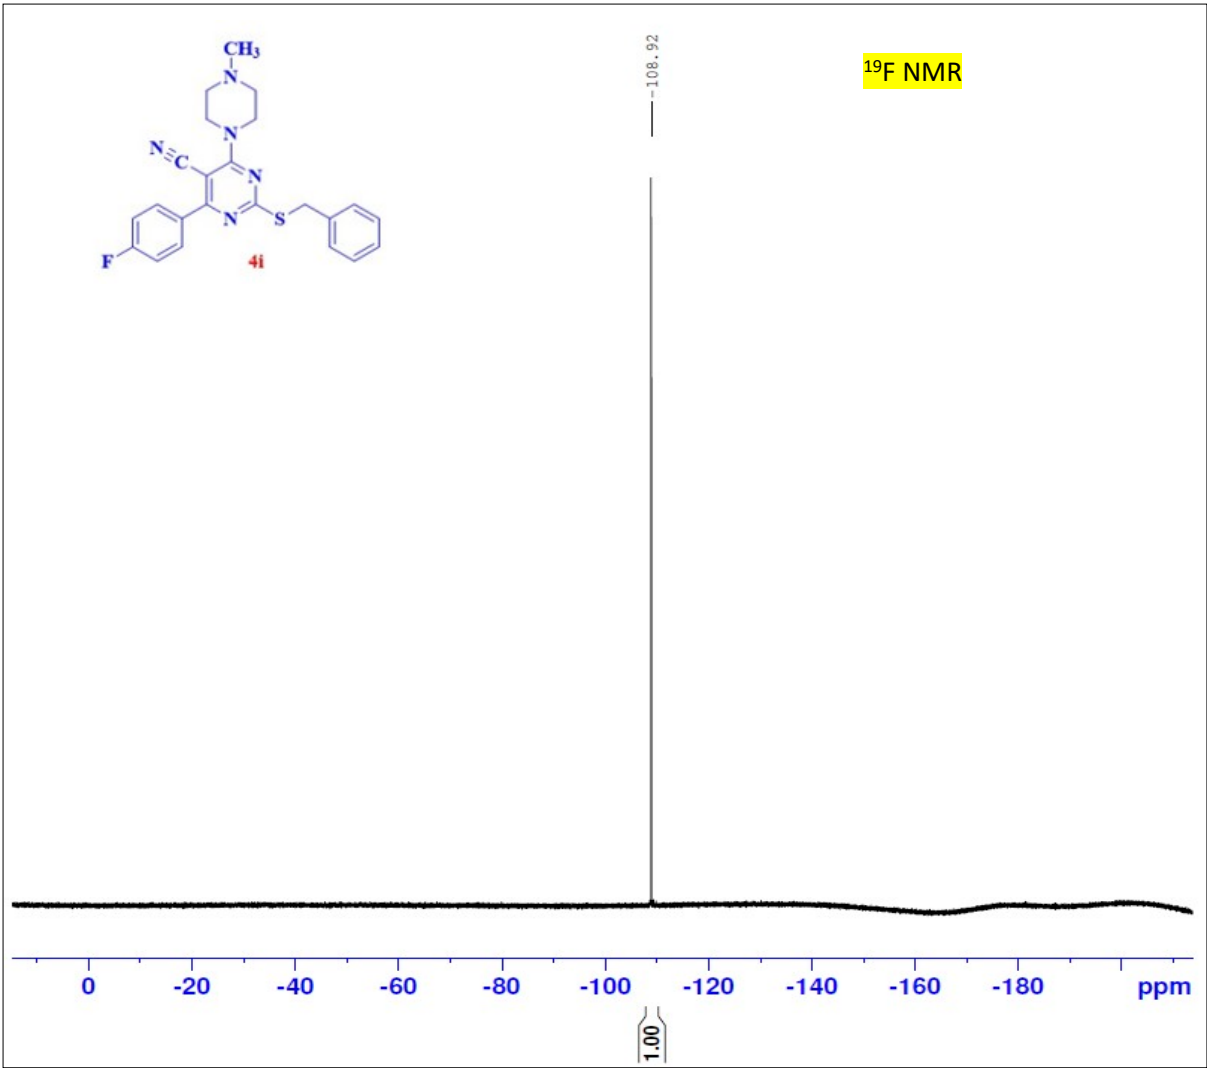



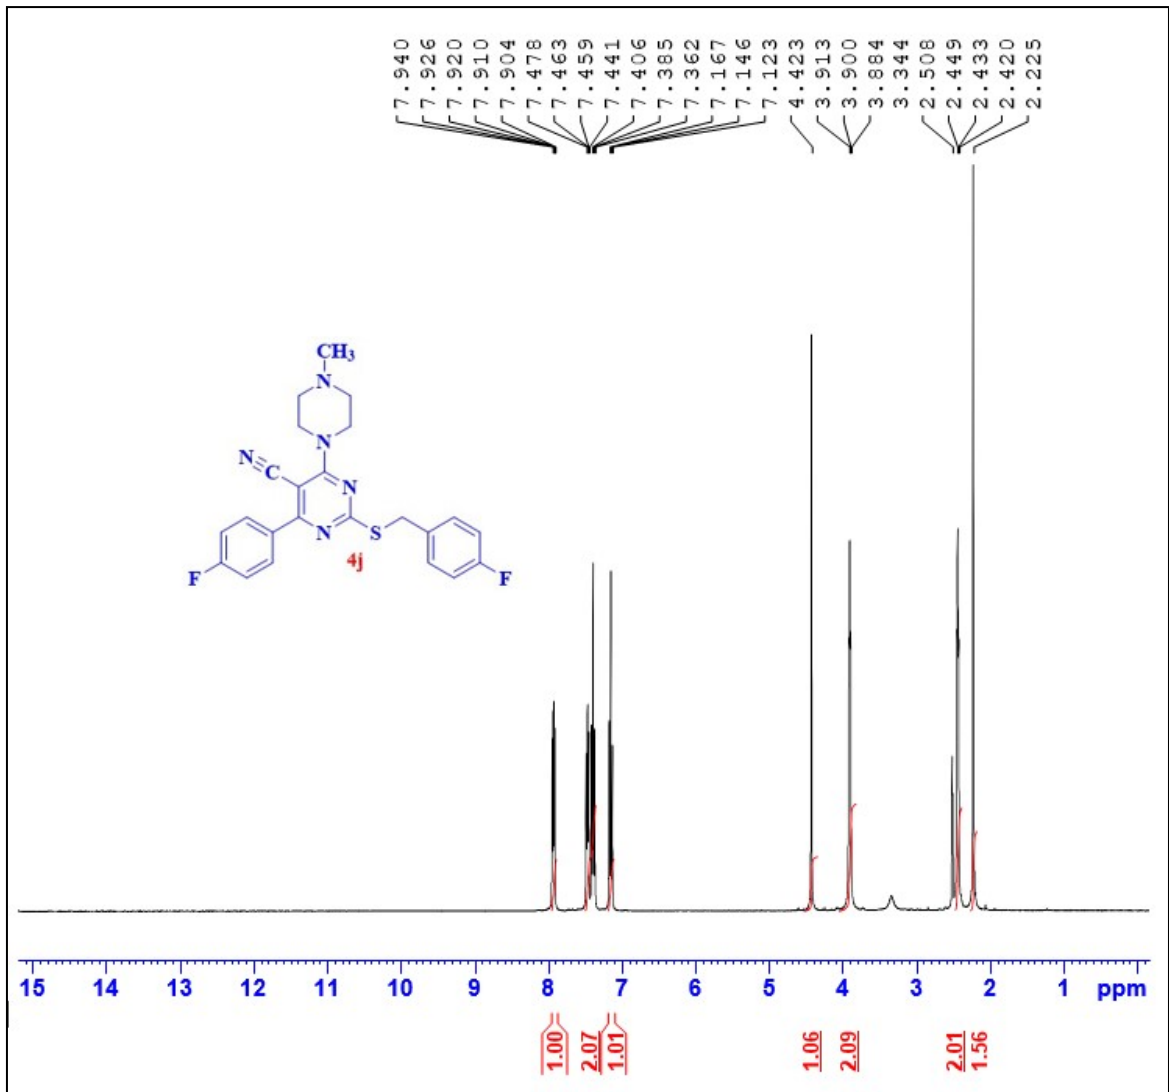

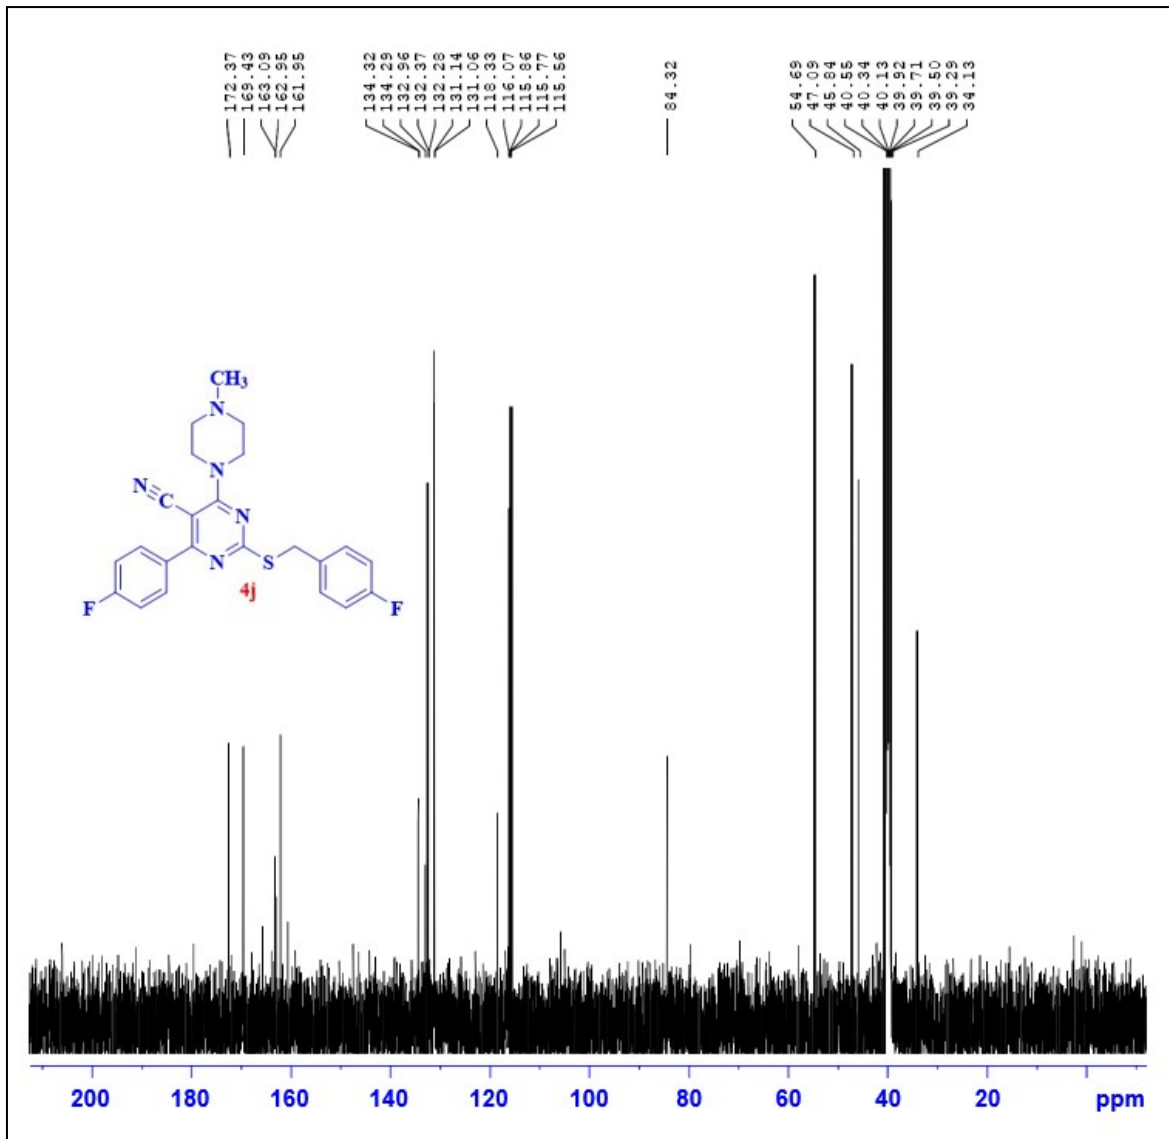

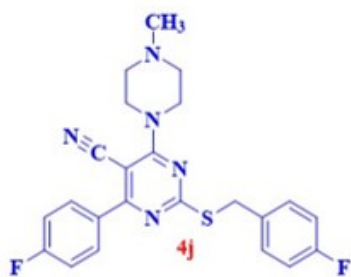

<sup>19</sup>F NMR

-108.93  
-115.46

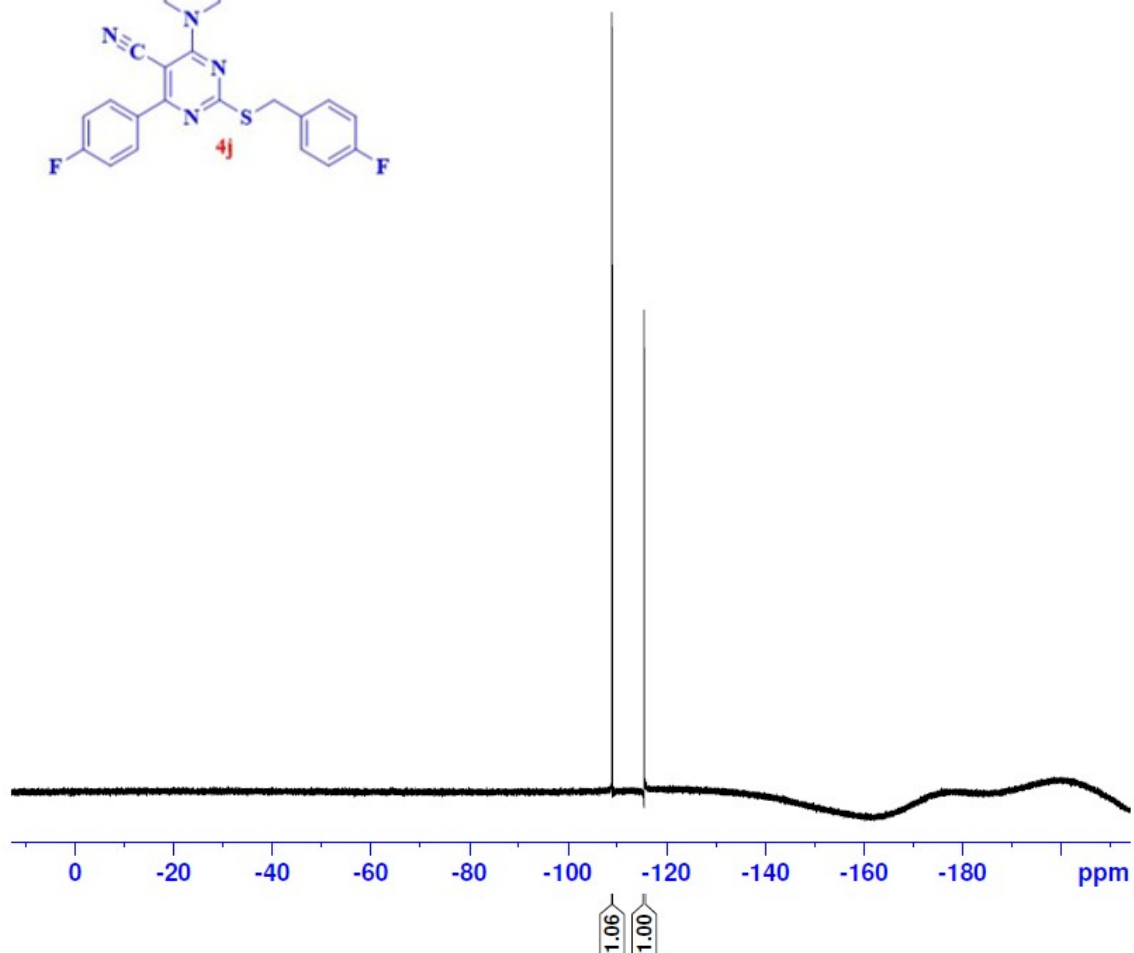

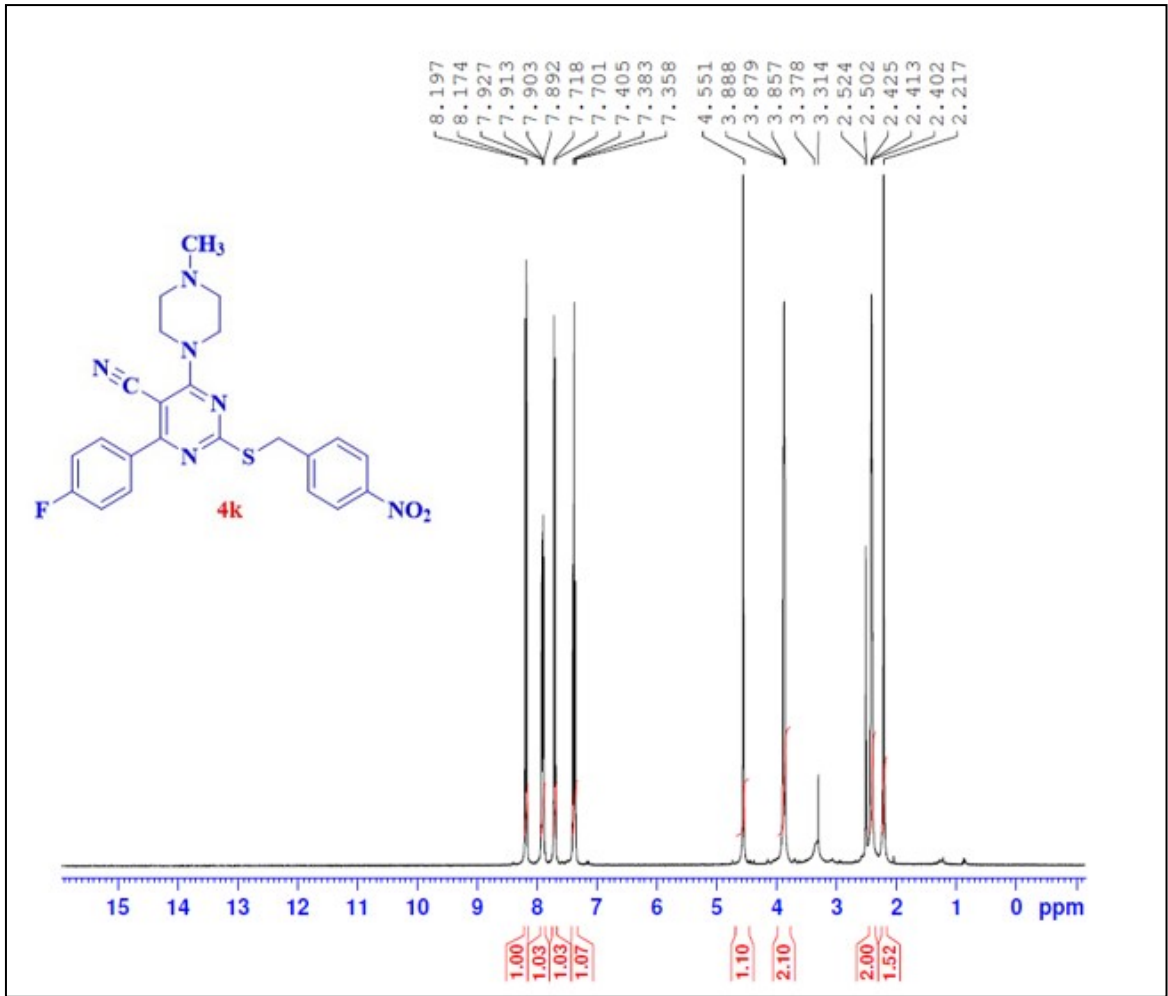

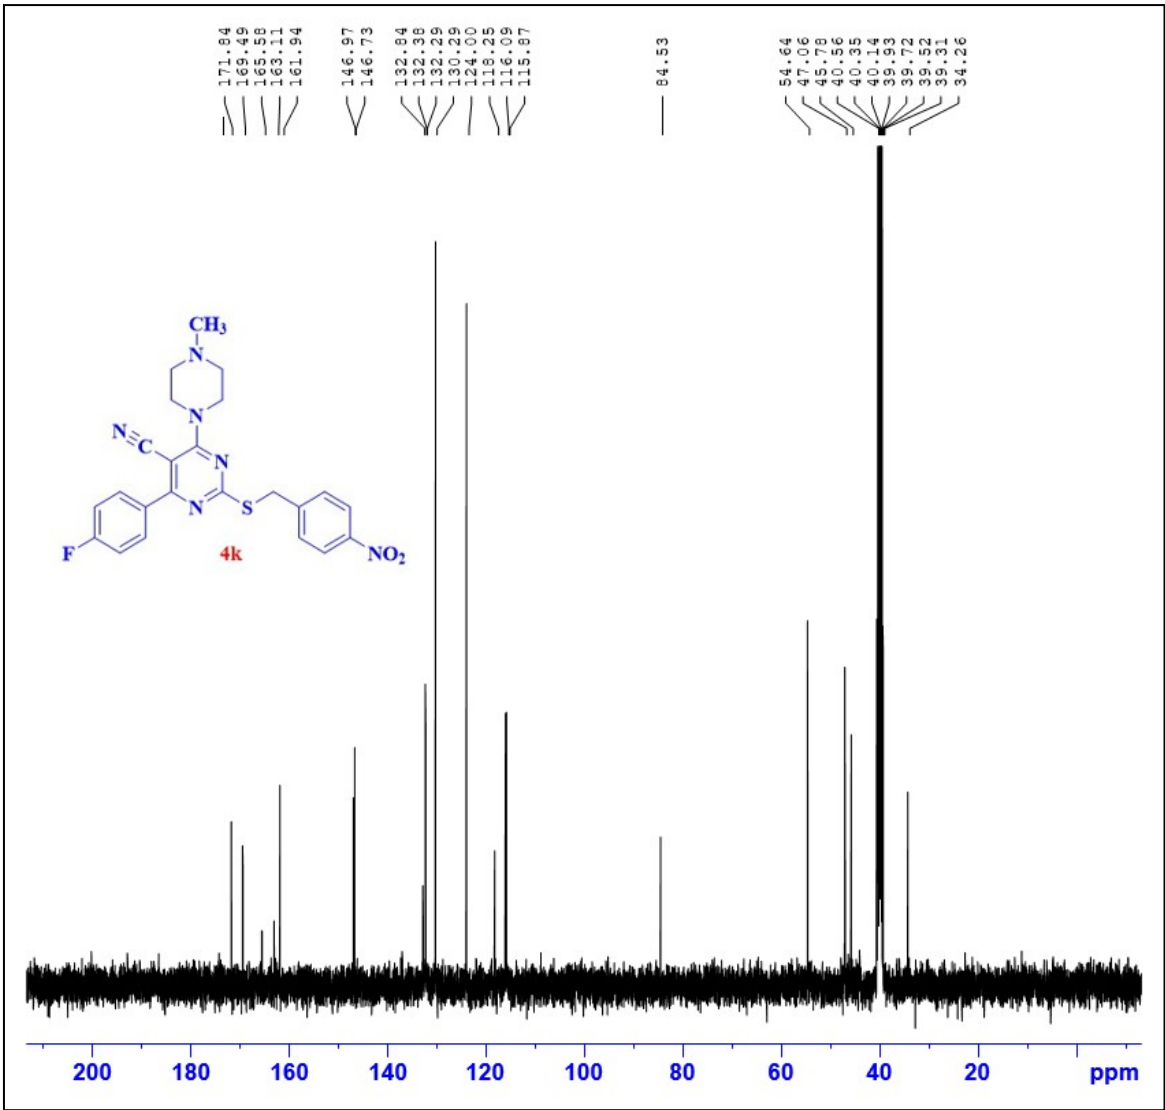

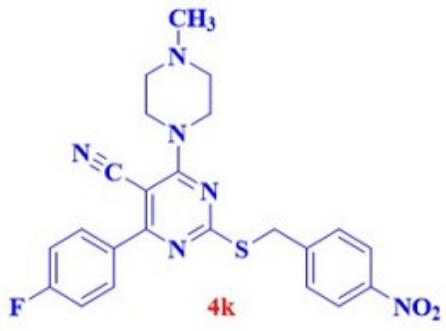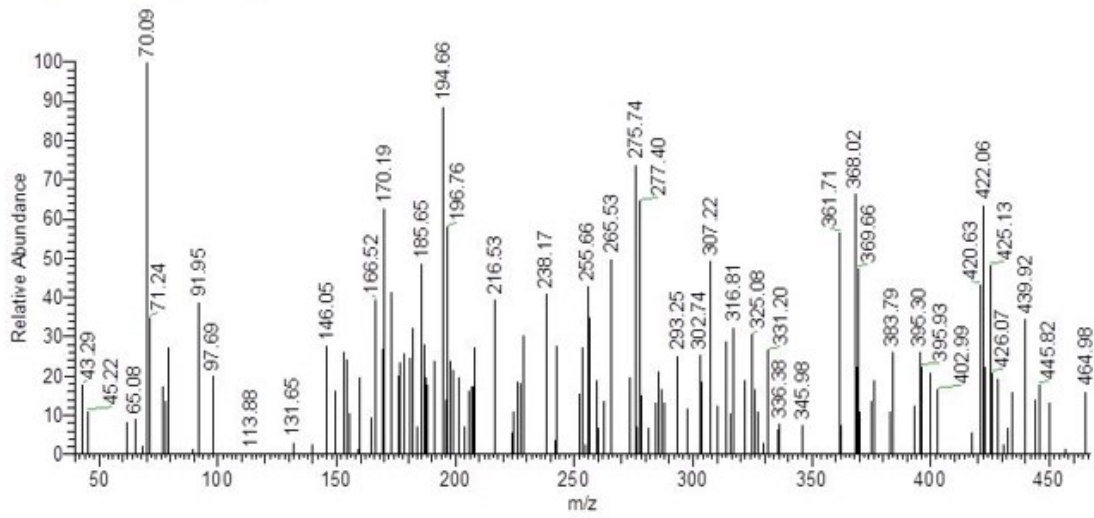

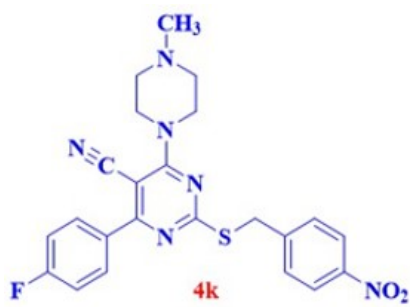

<sup>19</sup>F NMR

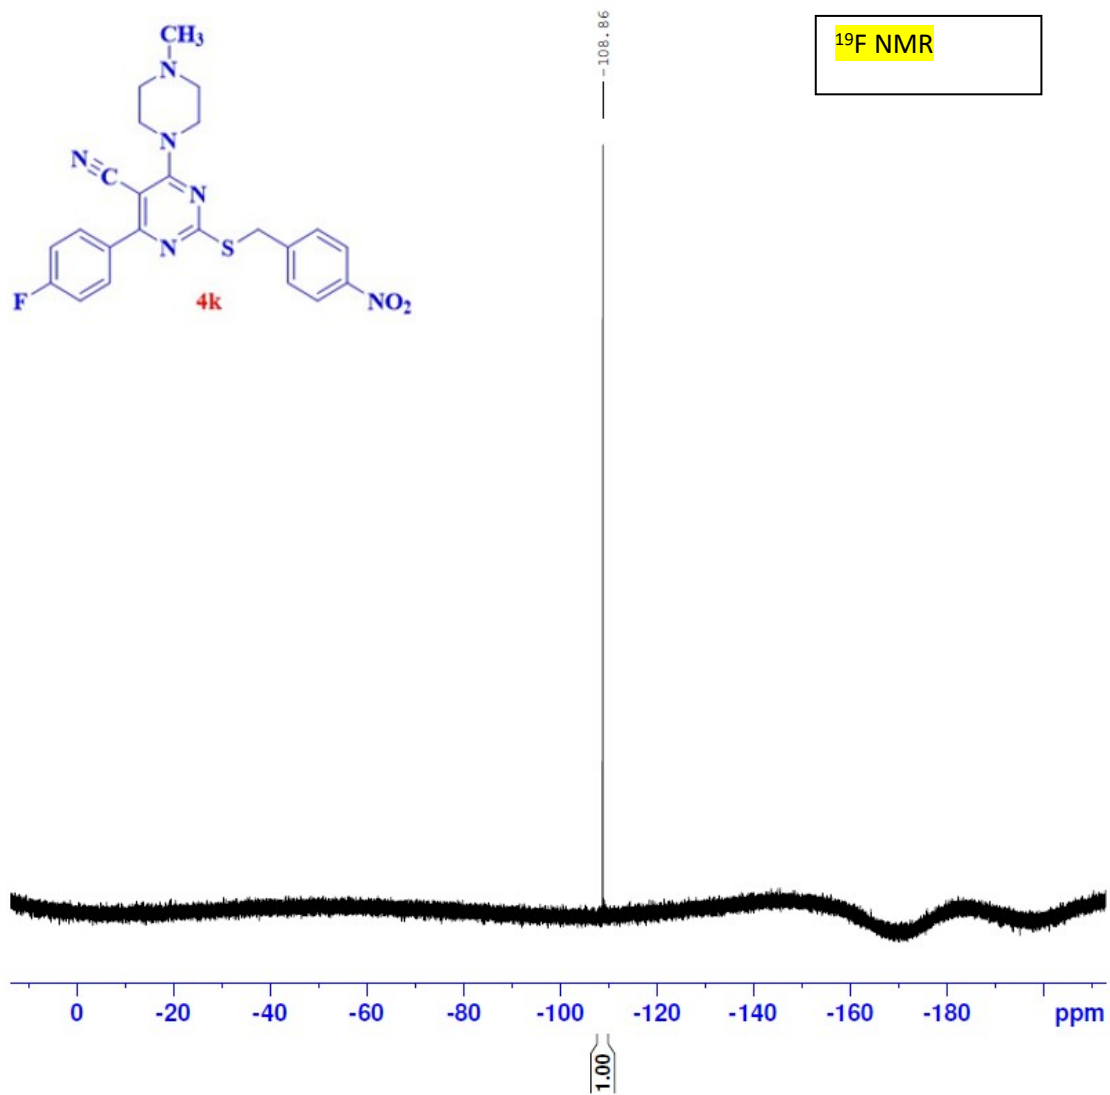

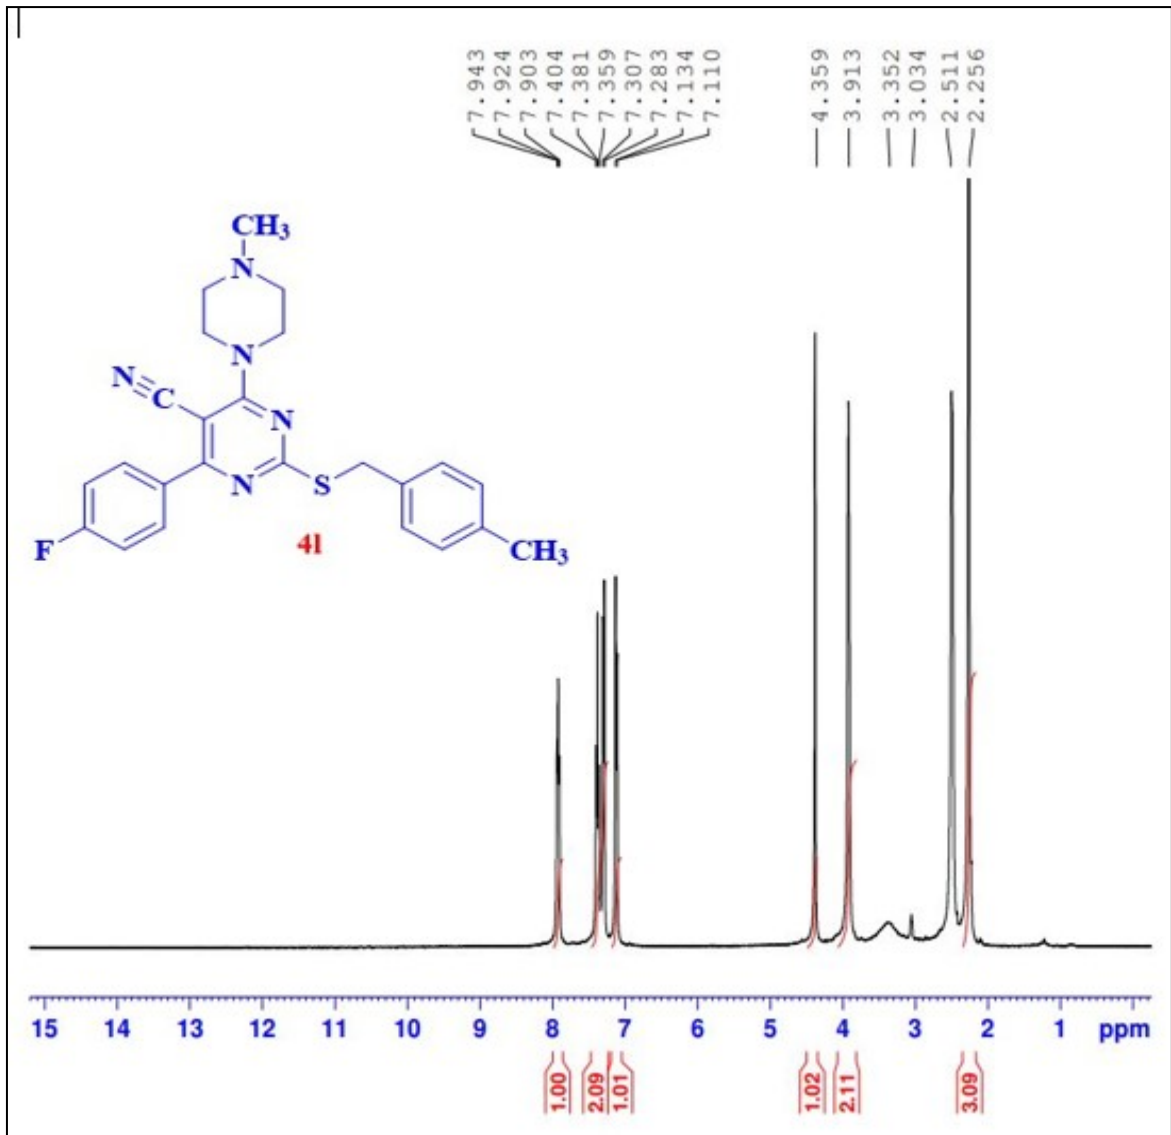



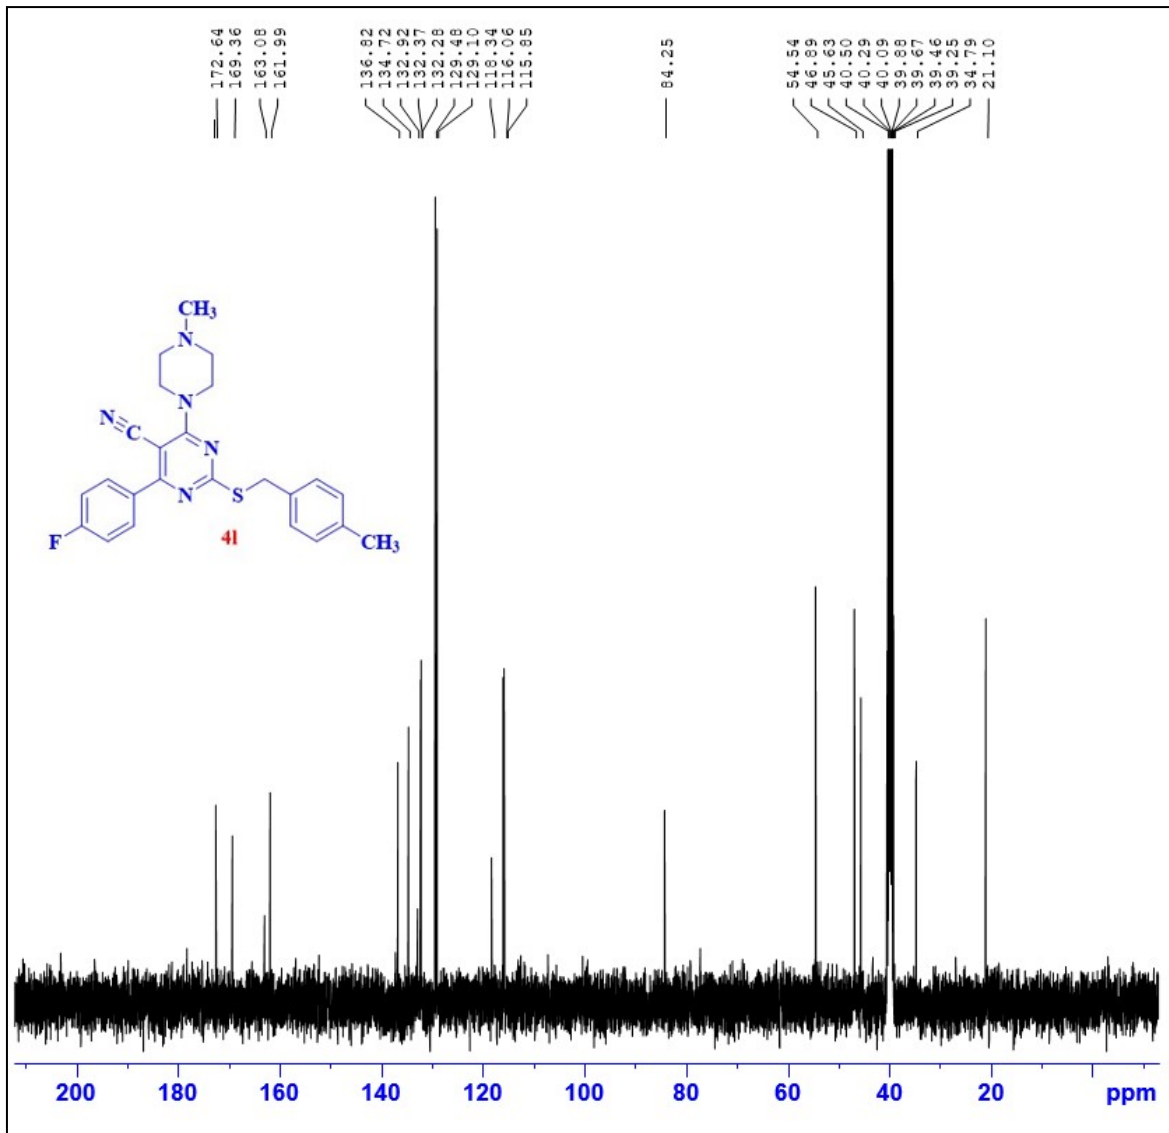

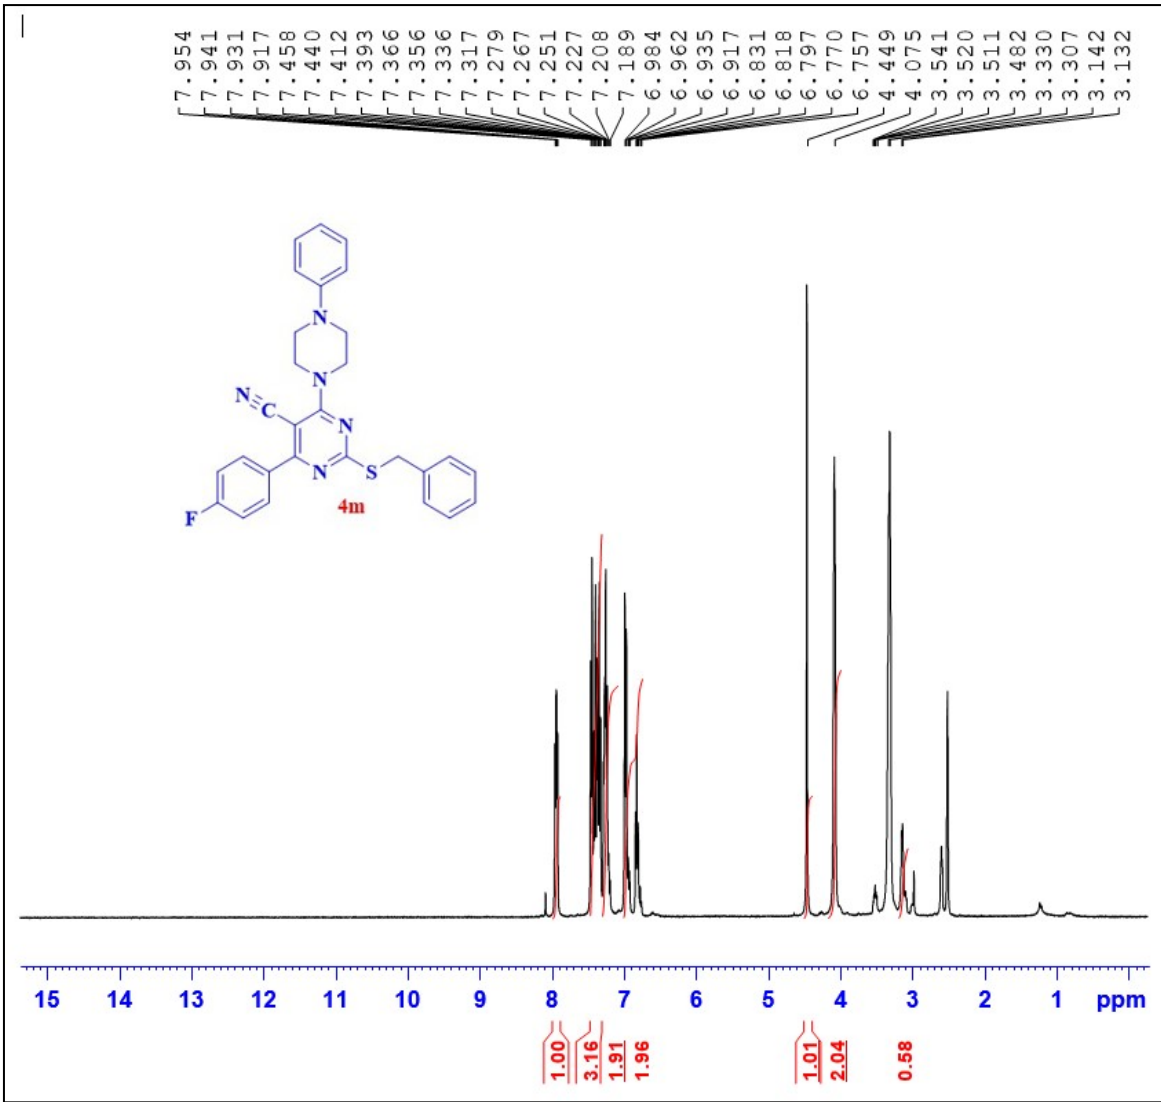

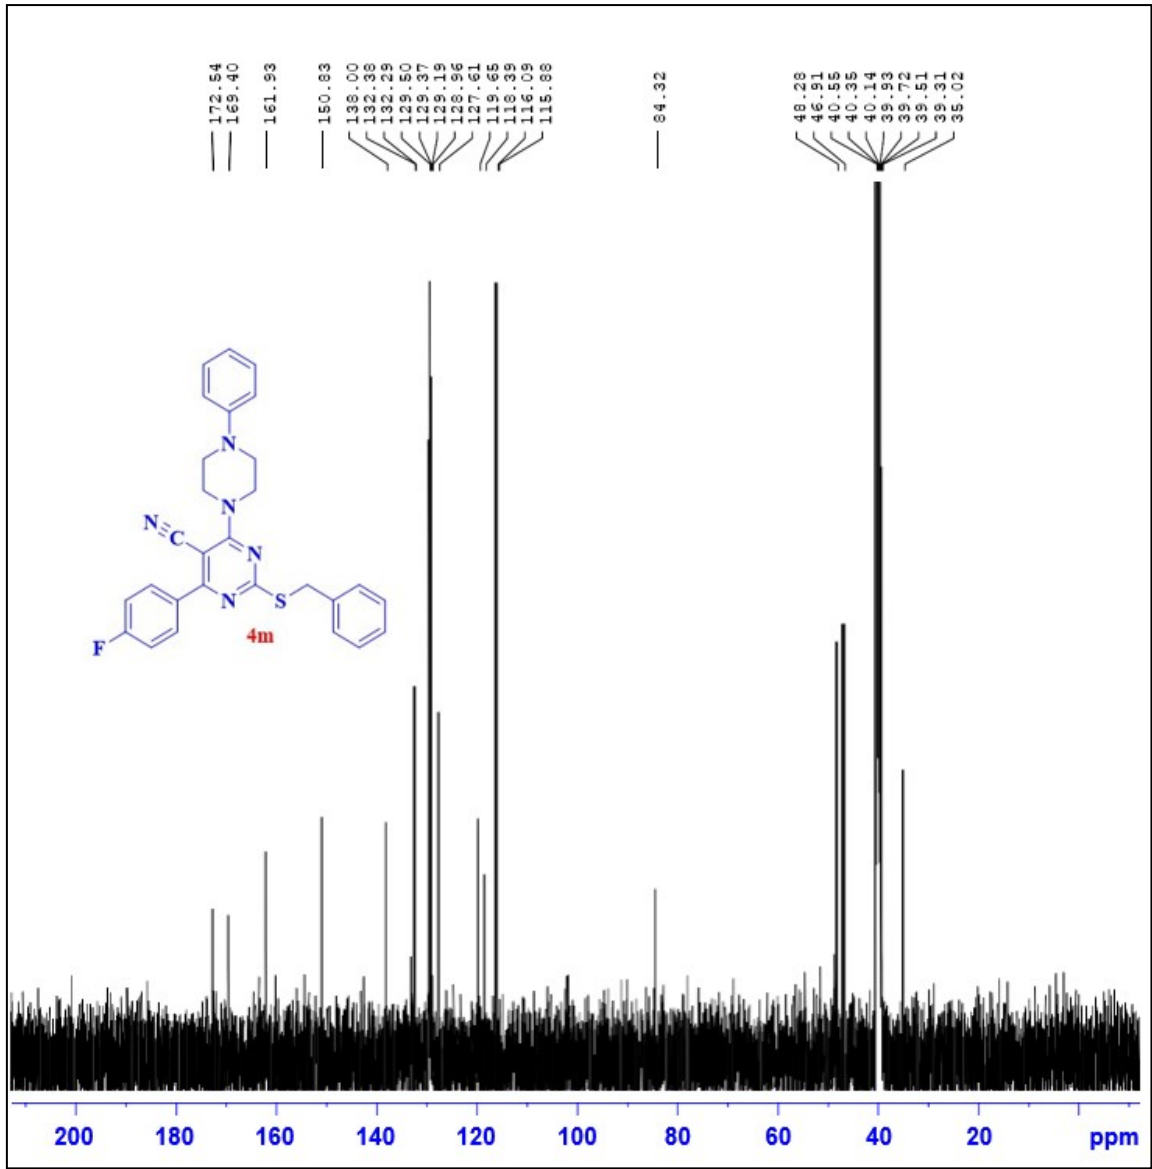

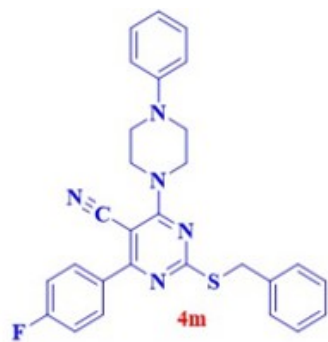

<sup>19</sup>F NMR

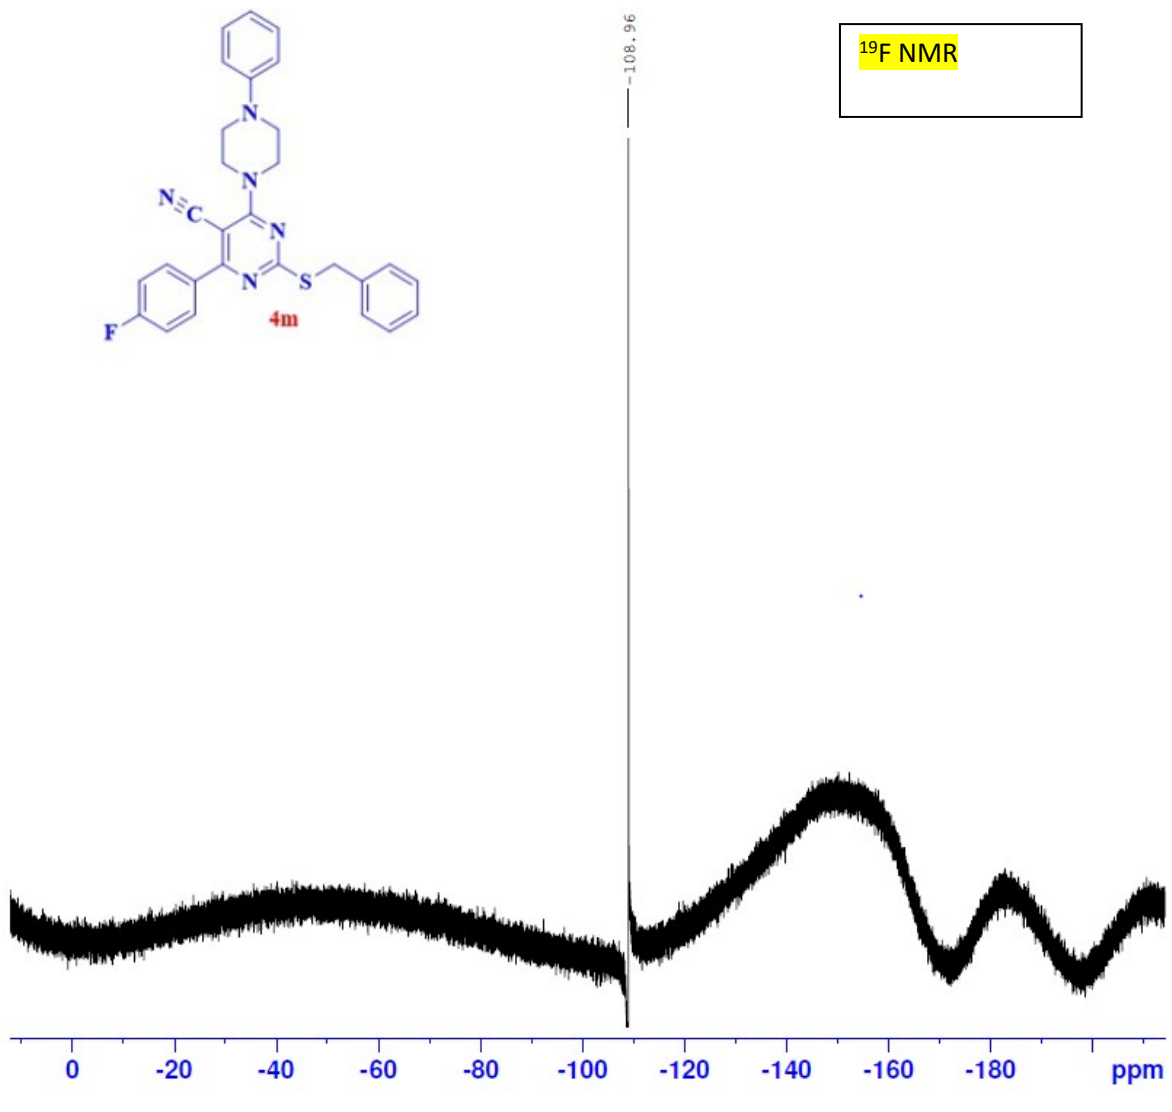

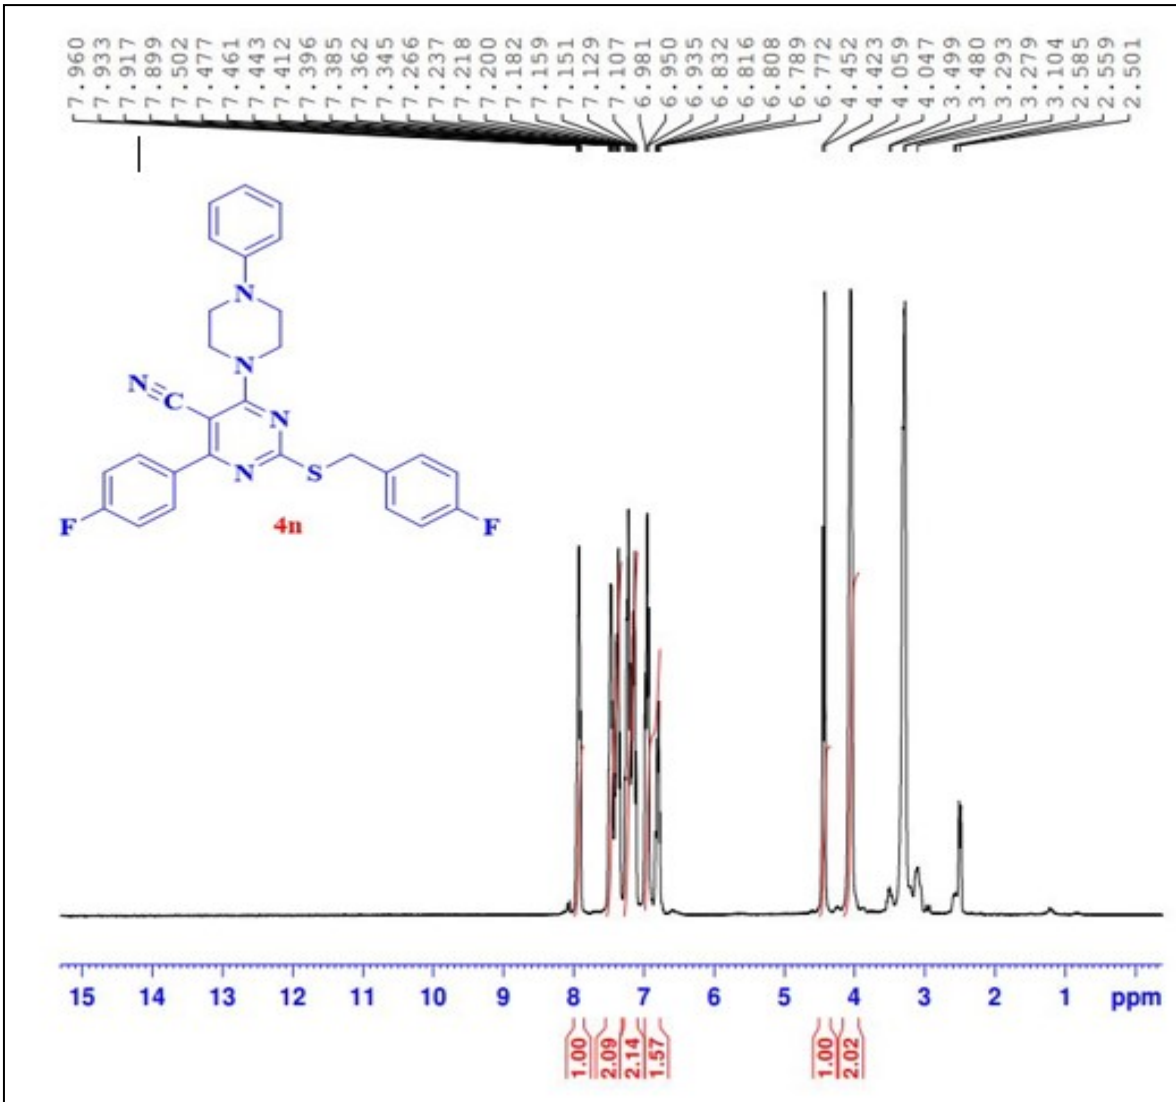

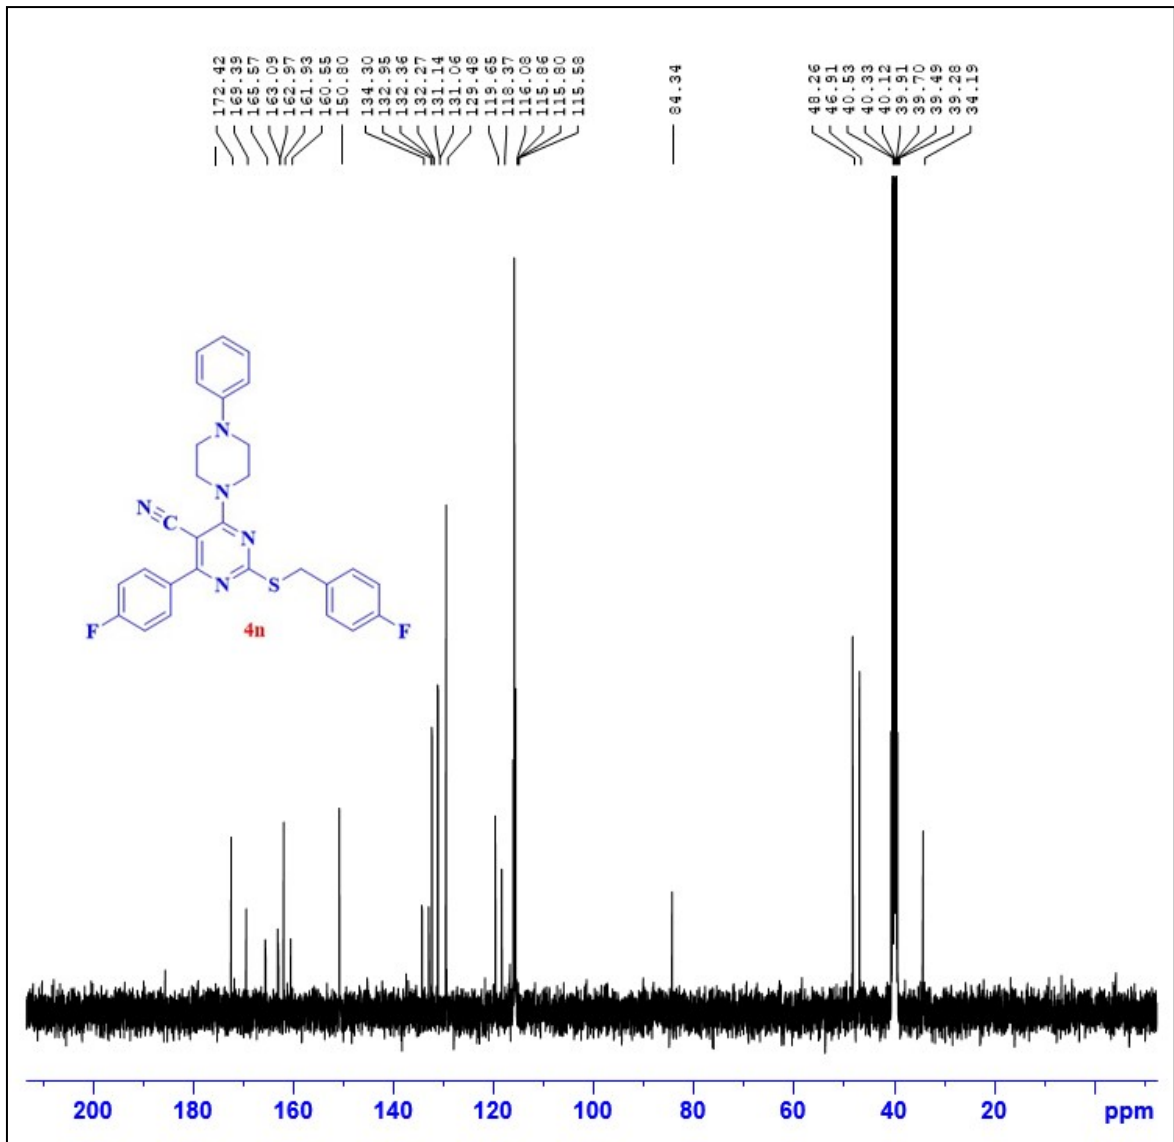

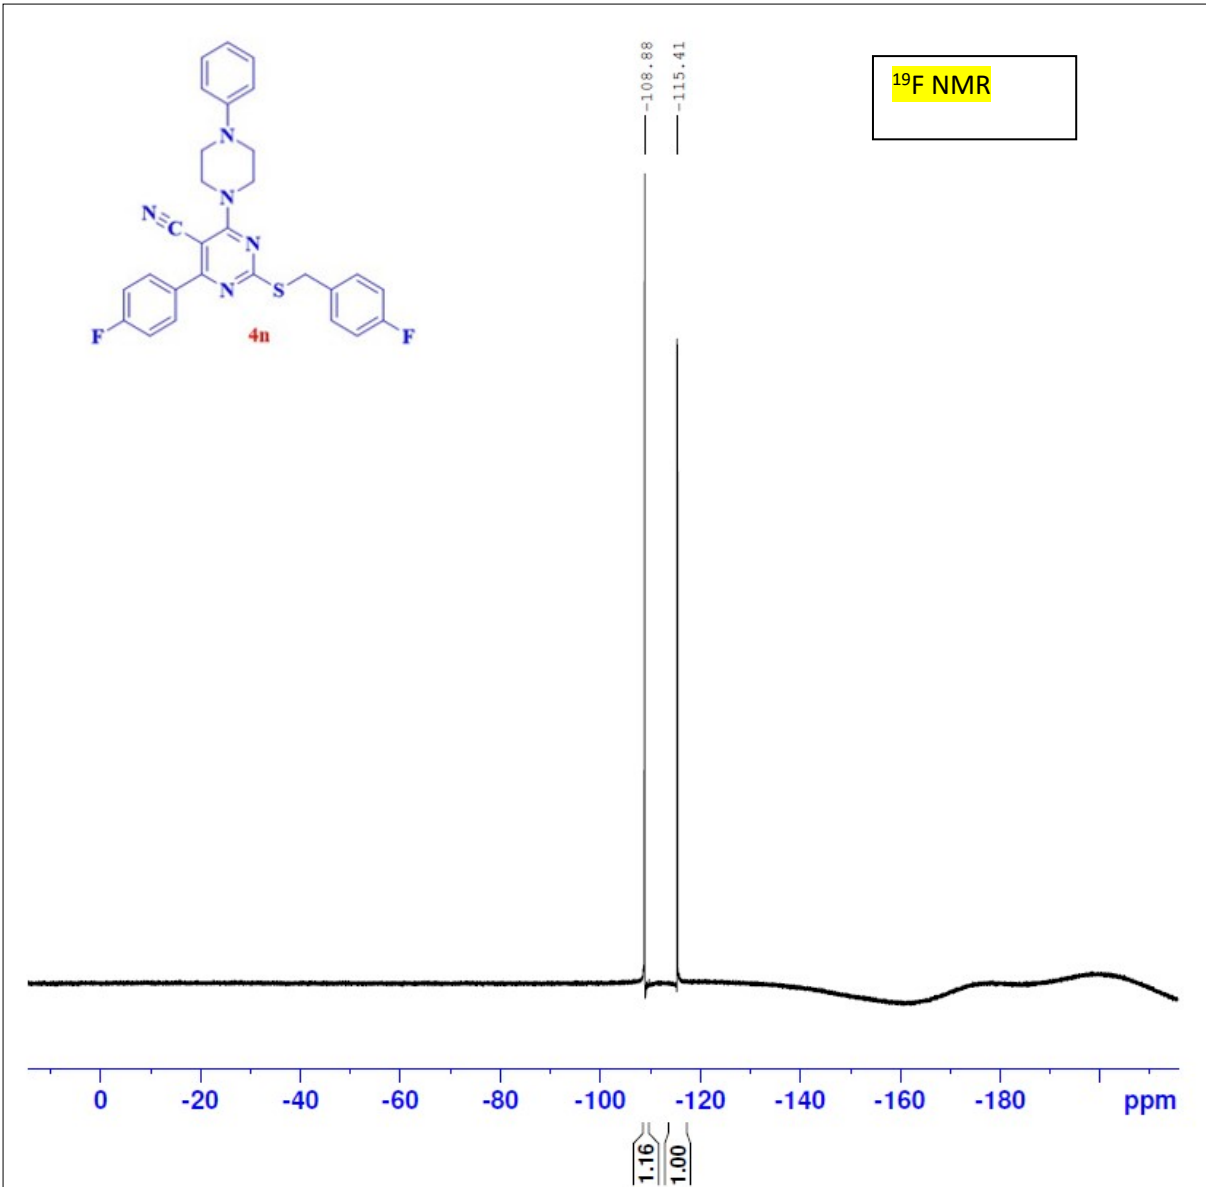

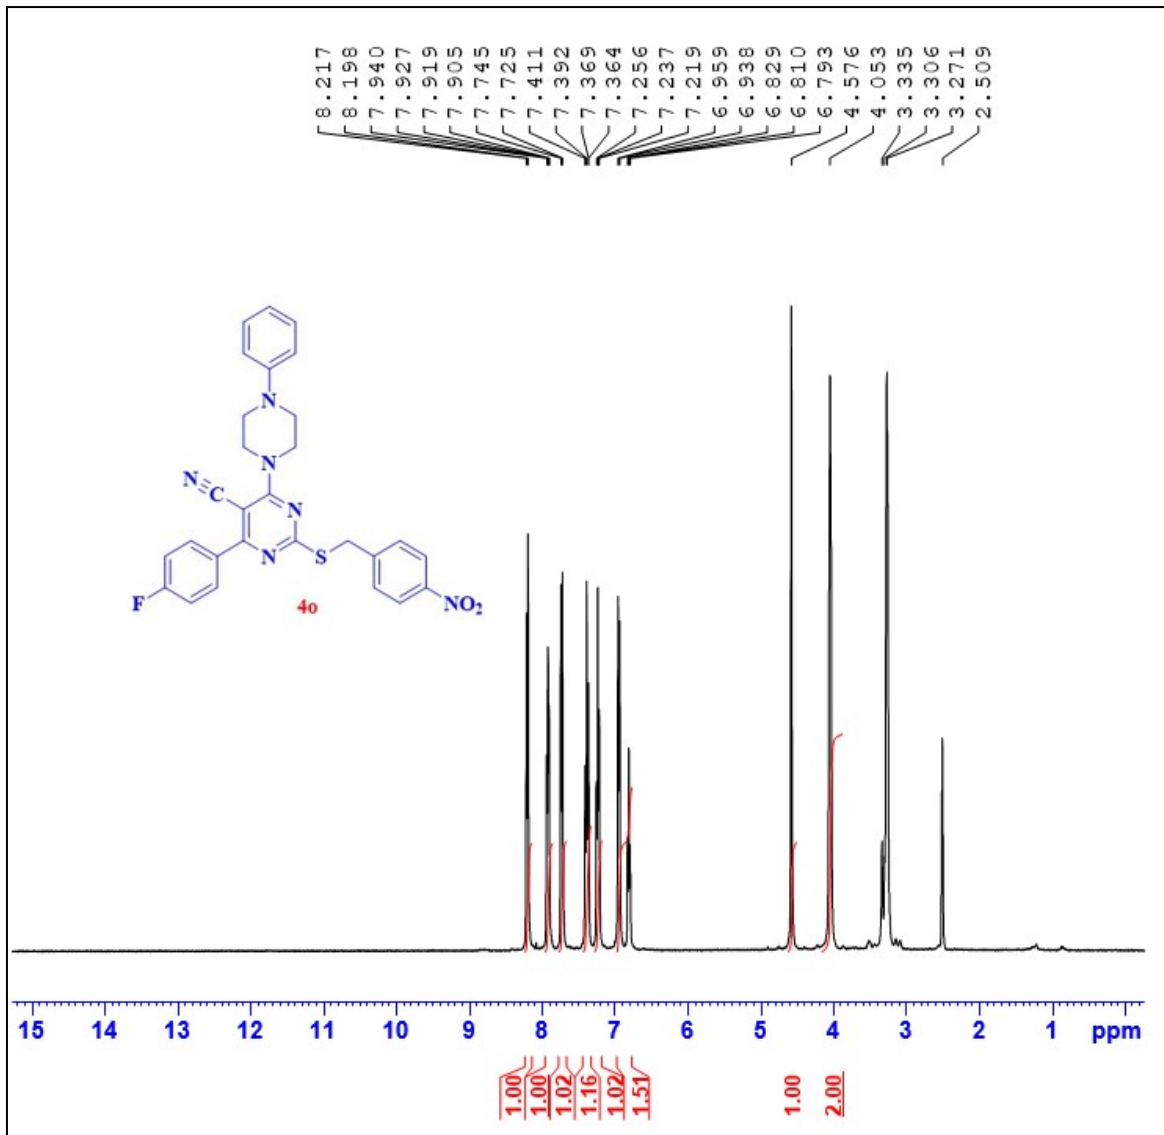



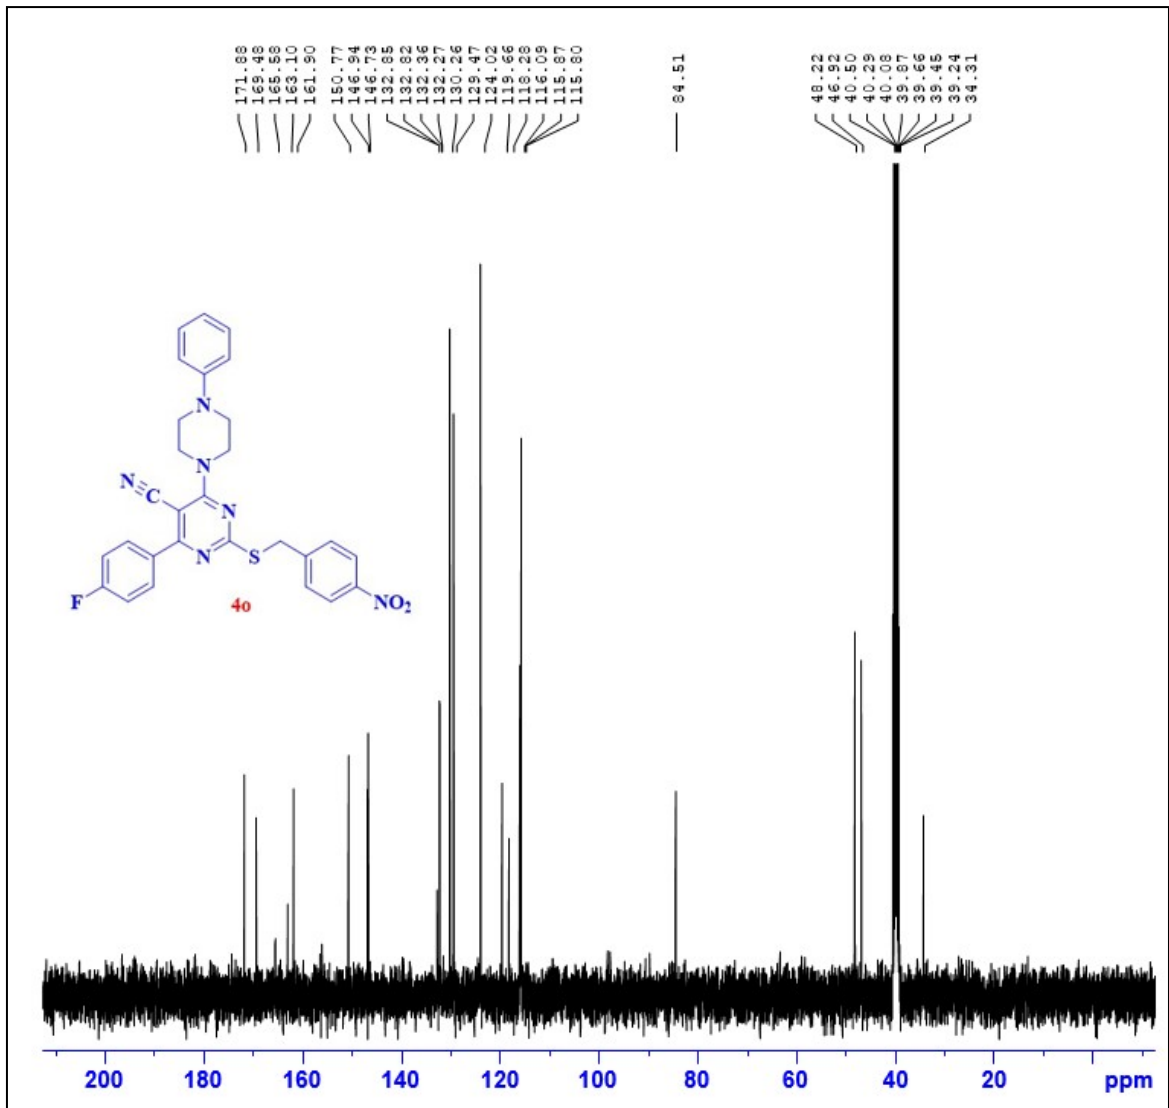

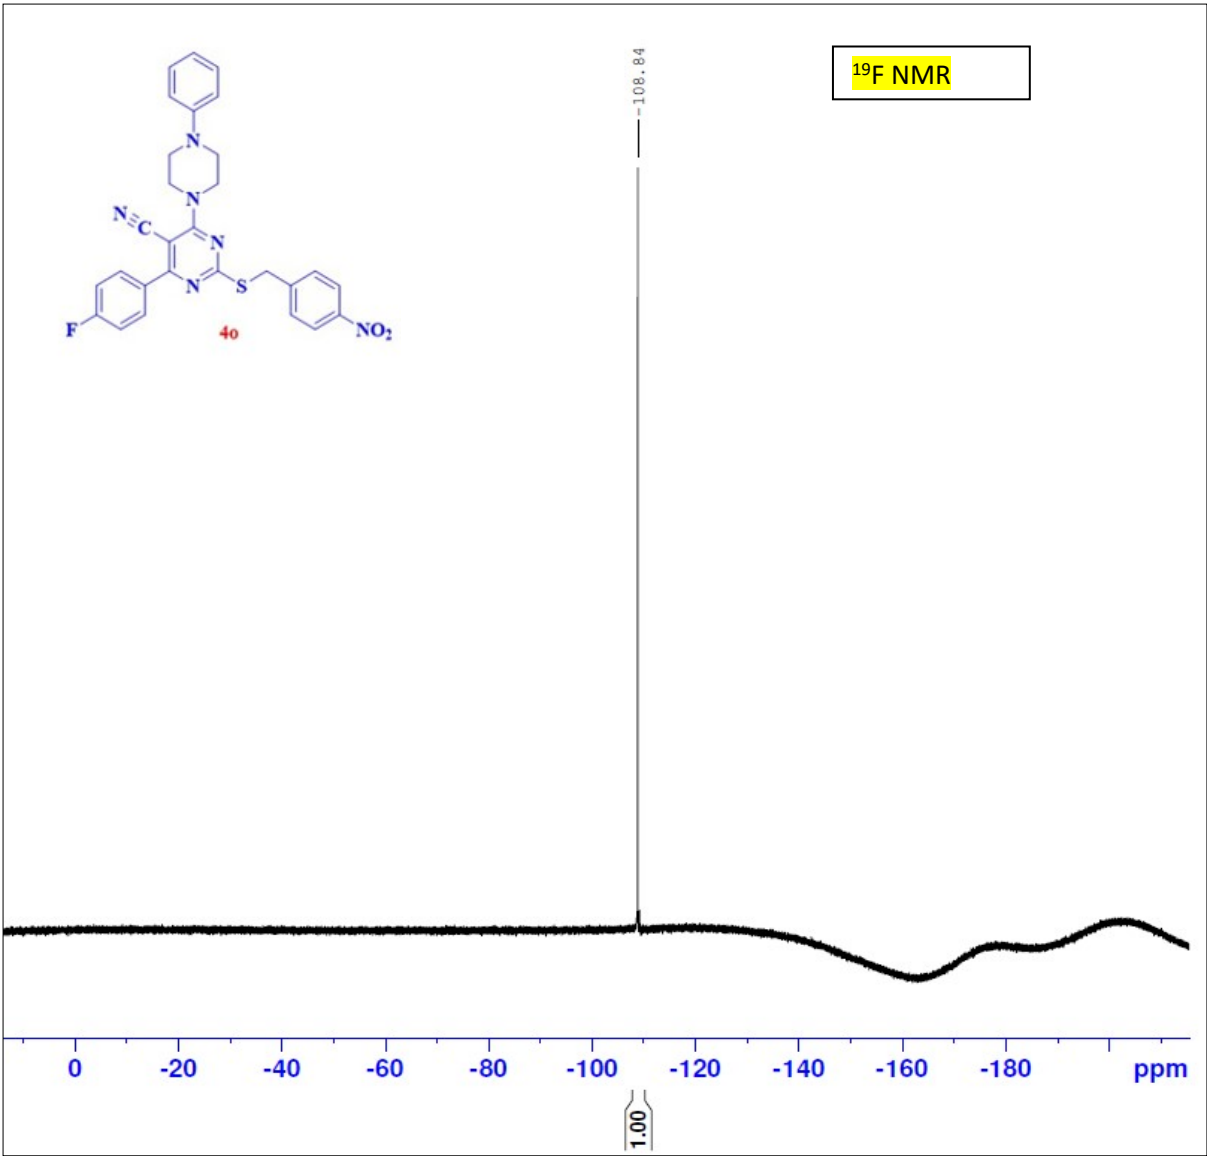

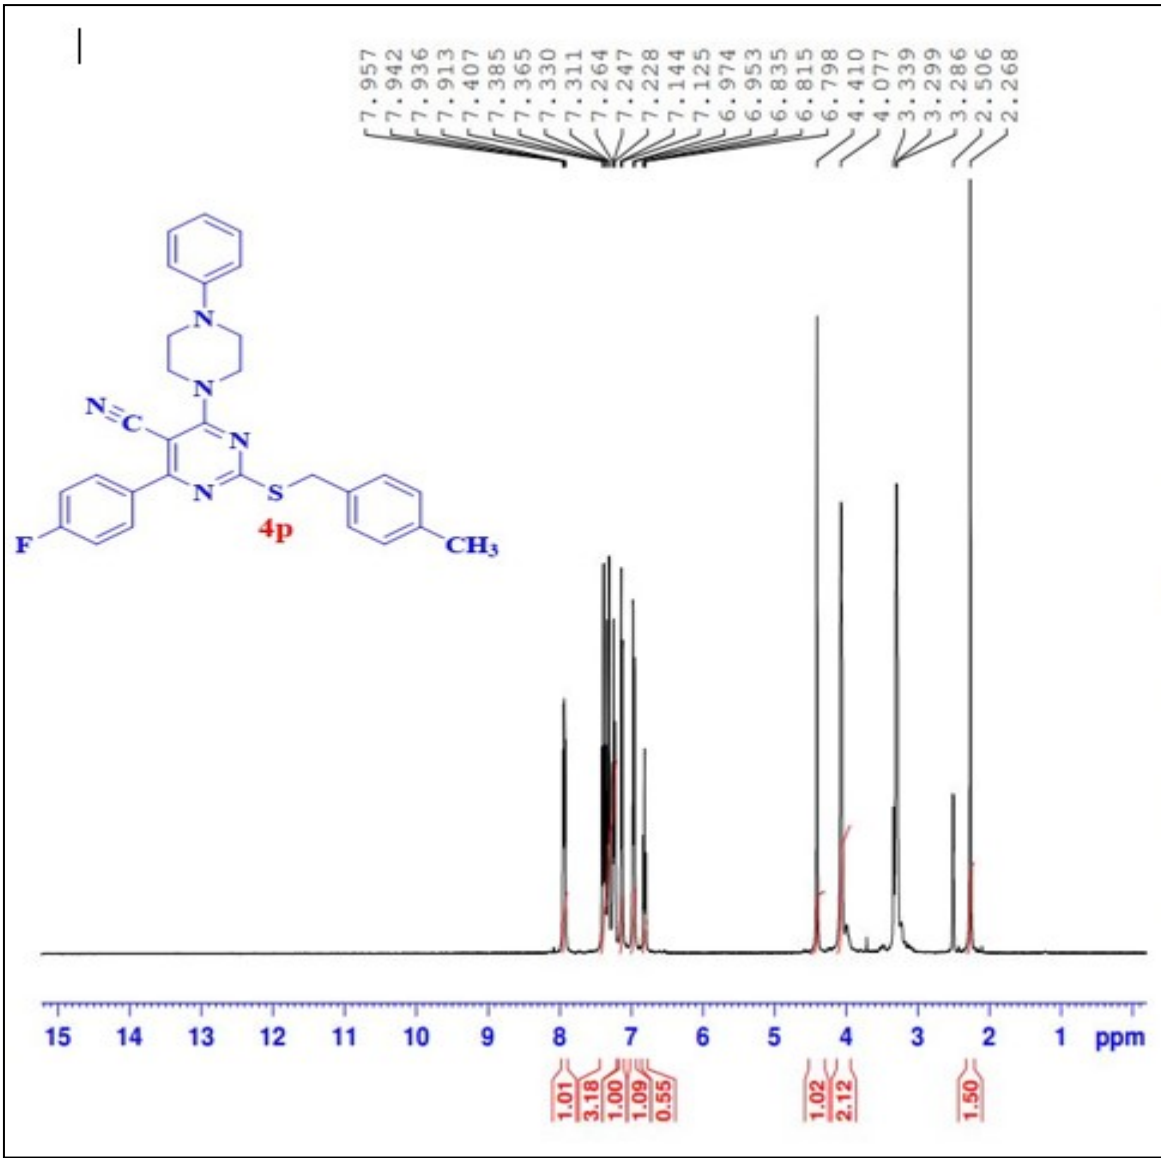

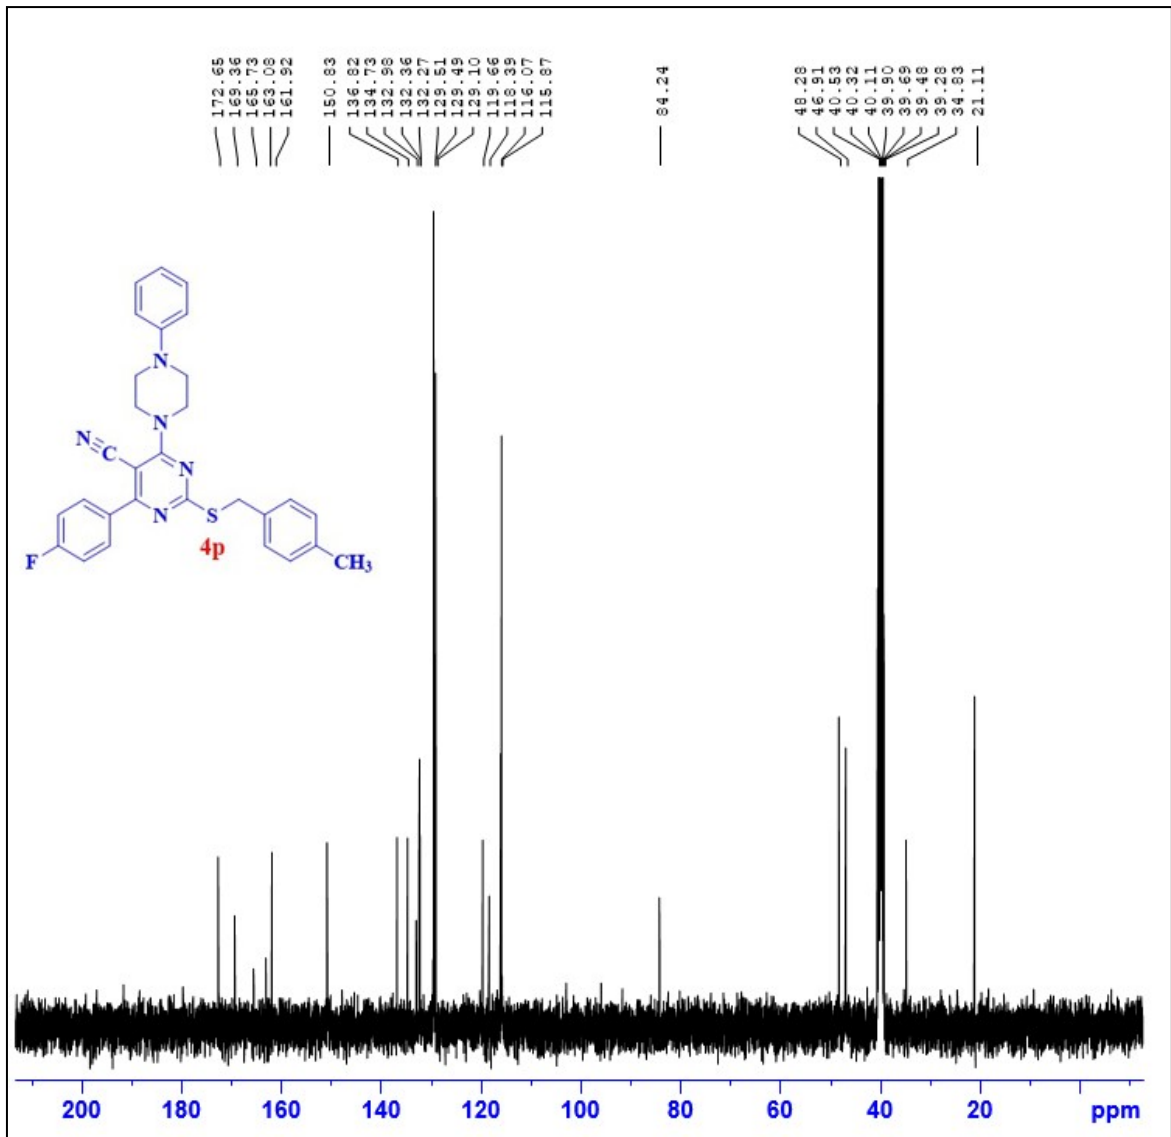

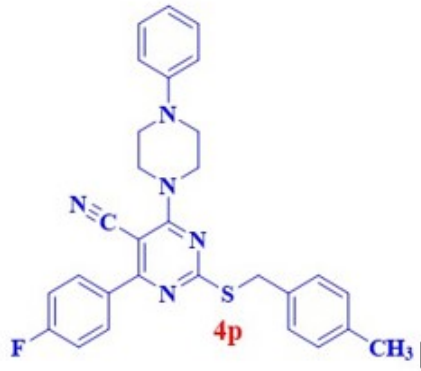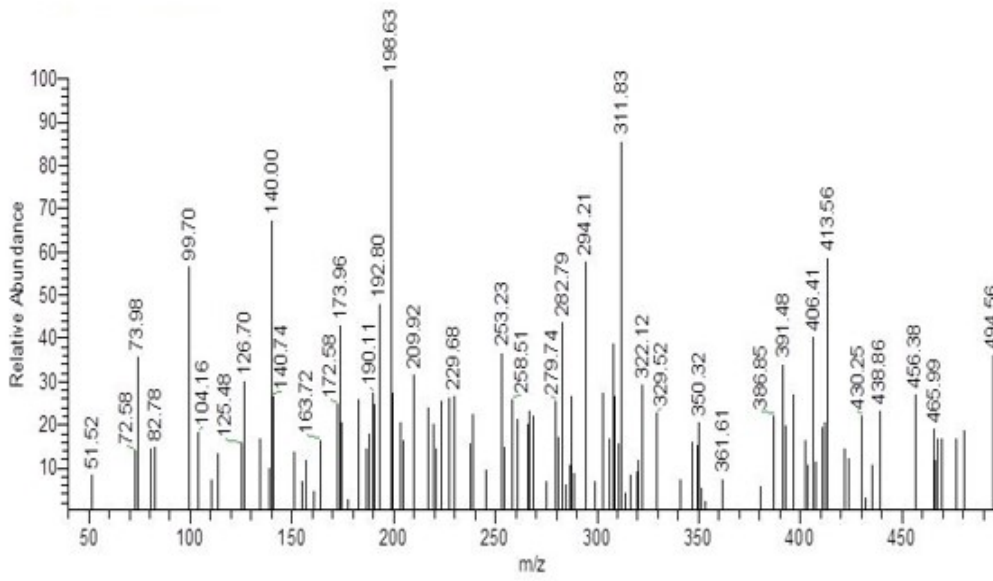

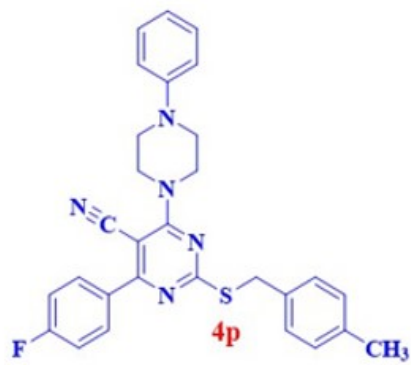

<sup>19</sup>F NMR

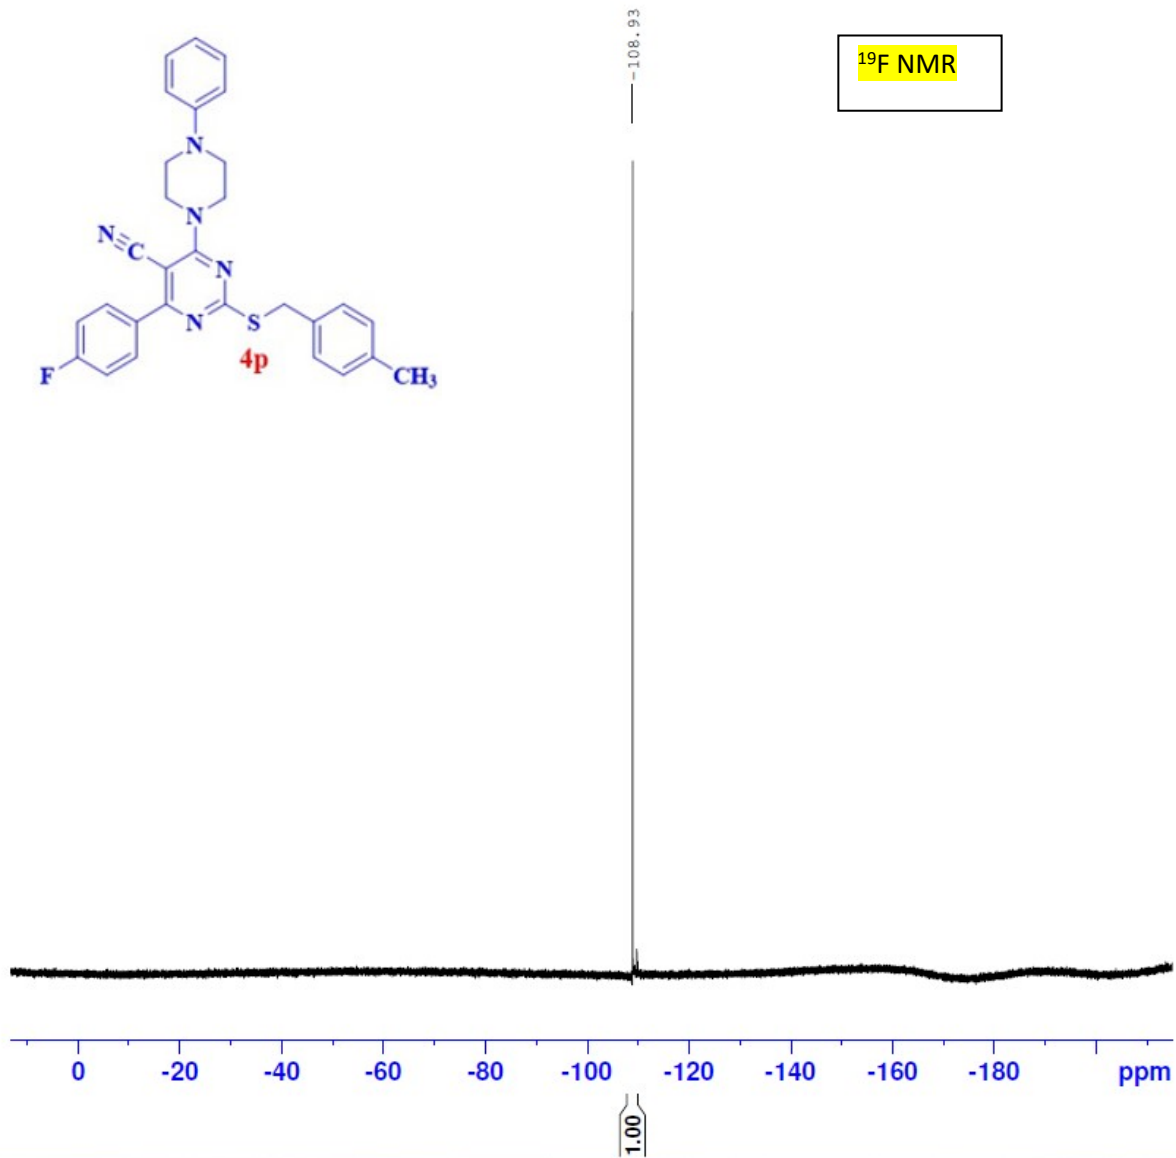

Supplement: d3ra06088h1.pdf [file d3ra06088h1.pdf]
