# Supplementary material for: Design, synthesis, and biological evaluation of new pyrimidine-5-carbonitrile derivatives as novel anti-cancer, dual EGFRWT/COX-2 inhibitors with docking studies
Source: Royal Society of Chemistry journal article supplement (doi:10.1039/d3ra06088h), 2023-01-01
Supplement: d3ra06088h2.pdf [file d3ra06088h2.pdf]

## Design, Synthesis, and Biological Evaluation of New Pyrimidine-5-carbonitrile Derivatives as Novel Anti-cancer, Dual EGFR<sup>WT</sup>/COX-2 Inhibitors with Docking Studies.

Nada Reda<sup>a,\*</sup>, Ahmed Elshewy<sup>b,c</sup>, Hesham I. EL-Askary<sup>c</sup>, Khaled O. Mohamed<sup>b</sup>, Amira A. Helwa<sup>a</sup>

### Supplementary 1

**Table 1a:** *In vitro* growth inhibition percent (GI%) for the NCI60 cancer cell lines upon treatment with 10 μM of Compounds (2b-d, 3a-d and 4a-d)

|                                   | 2b             | 2c    | 2d    | 3a    | 3b    | 3c    | 3d    | 4a    | 4b           | 4c           | 4d    |
|-----------------------------------|----------------|-------|-------|-------|-------|-------|-------|-------|--------------|--------------|-------|
| <b>Leukaemia</b>                  |                |       |       |       |       |       |       |       |              |              |       |
| CCRF-CEM                          | - <sup>a</sup> | 15.45 | -     | -     | 13.30 | 32.30 | 29.71 | -     | 12.89        | 22.80        | -     |
| HL-60(TB)                         | 20.88          | 49.95 | 43.38 | 44.03 | 49.83 | 57.98 | 51.77 | 31.31 | 15.01        | 17.28        | -     |
| K-652                             | -              | 31.45 | -     | 11.78 | 30.20 | 44.30 | 42.83 | 16.46 | 16.20        | 23.12        | 10.67 |
| MOLT-4                            | -              | 24.34 | 11.64 | -     | 19.35 | 38.07 | 29.08 | -     | -            | 26.34        | -     |
| RPMI-8226                         | -              | 14.16 | -     | -     | -     | 41.51 | 25.03 | -     | -            | 19.73        | -     |
| SR                                |                |       |       |       |       |       |       |       |              |              | -     |
| <b>Non-small cell lung cancer</b> |                |       |       |       |       |       |       |       |              |              |       |
| A549/ATCC                         | 15.77          | -     | 10.16 | 16.44 | -     | 33.50 | 16.81 | -     | 31.03        | 36.61        | 24.90 |
| EKVX                              | -              | 12.04 | -     | -     | 10.91 | 20.38 | 20.92 | -     | 39.92        | 60.74        | 13.10 |
| HOP-62                            | 16.84          | -     | -     | 12.77 | -     | -     | -     | -     | <b>75.65</b> | 65.34        | 36.77 |
| HOP-92                            | 19.25          | 33.01 | -     | 14.74 | 25.21 | 45.40 | 34.25 | 15.08 | 65.67        | 63.28        | 34.62 |
| NCI-H226                          | 24.21          | 22.53 | -     | 18.61 | 28.68 | 46.54 | 37.93 | -     | 51.64        | <b>76.22</b> | 21.35 |
| NCI-H23                           | 12.73          | -     | -     | -     | -     | 12.20 | -     | -     | 28.19        | 25.17        | -     |
| NCI-H322M                         | 7.12           | -     | -     | -     | -     | 13.28 | -     | -     | 21.55        | 17.30        | -     |
| NCI-H460                          | 13.27          | -     | -     | -     | -     | 13.48 | -     | -     | 26.13        | 22.56        | -     |
| NCI-H522                          | 25.94          | 30.52 | 12.91 | 16.01 | 25.38 | 37.48 | 29.73 | 16.81 | 45.02        | 58.72        | 44.57 |
| <b>Colon Cancer</b>               |                |       |       |       |       |       |       |       |              |              |       |
| COLO 205                          | -              | -     | -     | -     | -     | 22.66 | -     | -     | -            | -            | -     |
| HCC-2998                          | -              | -     | -     | -     | -     | 12.17 | -     | -     | 12.64        | -            | -     |
| HCT-116                           | 33.39          | 22.23 | -     | 22.79 | 18.51 | 40.70 | 25.73 | 10.37 | 33.96        | 35.64        | 19.81 |
| HCT-15                            | -              | 13.42 | 15.77 | -     | 13.00 | 45.64 | 24.97 | -     | 20.05        | 27.19        | -     |
| HT29                              | -              | 37.56 | 10.72 | -     | 13.44 | 61.63 | 51.51 | -     | -            | 13.41        | -     |
| KM12                              | -              | -     | -     | -     | -     | 27.77 | 19.05 | -     | 12.78        | 15.07        | -     |

|                       |              |       |   |       |       |       |       |       |              |              |              |
|-----------------------|--------------|-------|---|-------|-------|-------|-------|-------|--------------|--------------|--------------|
| SW-620                | -            | 10.78 | - | -     | -     | 37.21 | 11.21 | -     | 14.48        | 19.46        | -            |
| <b>CNS Cancer</b>     |              |       |   |       |       |       |       |       |              |              |              |
| SF-268                | 24.67        | -     | - | 21.56 | -     | 18.20 | 12.95 | -     | 56.58        | 50.66        | 22.32        |
| SF-295                | 25.73        | 10.37 | - | 27.87 | 10.01 | 29.81 | 11.51 | -     | 63.10        | 58.52        | 32.25        |
| SF-539                | 45.33        | -     | - | 24.06 | -     | 28.21 | 15.58 | 16.91 | 50.95        | <b>73.77</b> | 32.27        |
| SNB-19                | 18.35        | -     | - | 16.70 | -     | 10.67 | -     | -     | 56.32        | 53.96        | 44.48        |
| SNB-75                | 23.60        | -     | - | -     | -     | -     | -     | -     | <b>82.51</b> | <b>92.38</b> | <b>88.04</b> |
| U251                  | 33.40        | 13.78 | - | 39.15 | -     | 31.17 | 15.75 | -     | 52.85        | 44.68        | 13.13        |
| <b>Melanoma</b>       |              |       |   |       |       |       |       |       |              |              |              |
| LOX IMVI              | 10.55        | 14.24 | - | -     | -     | 14.22 | -     | -     | 23.57        | 15.29        | 11.10        |
| MALME-3M              | -            | -     | - | -     | -     | -     | -     | -     | 41.38        | 57.24        | 26.17        |
| M14                   | -            | -     | - | -     | -     | 12.41 | -     | -     | -            | 12.25        | -            |
| MDA-MB-435            | -            | -     | - | -     | -     | -     | -     | -     | -            | 16.03        | -            |
| SK-MEL-2              | -            | -     | - | -     | -     | -     | -     | -     | 21.29        | 12.63        | -            |
| SK-MEL-28             | -            | -     | - | -     | -     | -     | -     | -     | 14.16        | 17.90        | -            |
| SK-MEL-5              | -            | 11.85 | - | -     | 13.82 | 22.36 | 15.98 | -     | 25.68        | 38.14        | 10.99        |
| UACC-257              | -            | -     | - | -     | -     | 24.66 | -     | -     | 22.89        | 45.85        | 17.42        |
| UACC-62               | 11.33        | 11.42 | - | -     | 13.95 | 22.80 | 17.58 | 13.24 | 30.66        | 37.29        | 22.83        |
| <b>Ovarian Cancer</b> |              |       |   |       |       |       |       |       |              |              |              |
| IGROV1                | -            | -     | - | -     | -     | -     | -     | -     | -            | 19.45        | -            |
| OVCAR-3               | -            | -     | - | -     | -     | 13.71 | -     | -     | 24.80        | 30.28        | -            |
| OVCAR-4               | <b>73.14</b> | -     | - | 49.74 | -     | 18.42 | 14.97 | -     | 39.53        | 42.76        | 20.15        |
| OVCAR-5               | -            | -     | - | -     | -     | -     | -     | -     | 16.89        | -            | -            |
| OVCAR-8               | 48.04        | -     | - | 27.14 | 10.81 | 16.16 | -     | 21.20 | 45.16        | 46.89        | 23.86        |
| NCI/ADR-RES           | 37.17        | 12.03 | - | 20.64 | 13.45 | 27.59 | 14.93 | 10.32 | 36.47        | 58.37        | -            |
| SK-OV-3               | 26.25        | -     | - | -     | -     | 11.73 | -     | -     | 60.37        | 55.46        | 11.69        |
| <b>Renal Cancer</b>   |              |       |   |       |       |       |       |       |              |              |              |
| 786-0                 | <b>84.82</b> | -     | - | 38.26 | -     | 21.29 | 12.30 | -     | <b>75.34</b> | 69.78        | 55.92        |
| A498                  | -            | -     | - | -     | -     | -     | -     | -     | 28.08        | 35.57        | -            |
| ACHN                  | 26.83        | -     | - | 45.51 | -     | 14.60 | -     | -     | 53.35        | 48.98        | 37.30        |
| CAKI-1                | 24.10        | 10.99 | - | 21.66 | -     | 32.89 | 16.99 | -     | 69.32        | 64.15        | 44.00        |
| RXF 393               | 28.91        | -     | - | 19.19 | 10.29 | 29.76 | 12.49 | -     | 58.43        | <b>90.21</b> | 48.96        |
| SN12C                 | 17.08        | 14.07 | - | -     | 19.06 | 29.81 | 27.59 | -     | 27.12        | 25.44        | -            |
| TK-10                 | 17.90        | -     | - | -     | -     | -     | -     | -     | 22.42        | 15.83        | -            |

|                        |       |       |       |       |       |       |       |       |              |              |       |
|------------------------|-------|-------|-------|-------|-------|-------|-------|-------|--------------|--------------|-------|
| UO-31                  | 26.71 | 11.53 | -     | 14.25 | 12.89 | 32.10 | 17.01 | -     | 13.97        | 49.11        | 10.06 |
| <b>Prostate Cancer</b> |       |       |       |       |       |       |       |       |              |              |       |
| PC-3                   | -     | 18.97 | -     | -     | -     | 57.37 | 35.47 | -     | 28.37        | 40.85        | -     |
| DU-145                 | -     | -     | -     | -     | -     | 24.93 | 18.41 | -     | 22.16        | 26.65        | -     |
| <b>Breast Cancer</b>   |       |       |       |       |       |       |       |       |              |              |       |
| MCF7                   | -     | -     | 10.82 | -     | 17.40 | 27.06 | 12.55 | -     | 36.26        | 41.49        | 11.76 |
| MDA-MB-231/ATCC        | 39.26 | -     | -     | 21.72 | -     | -     | -     | 10.65 | 49.52        | 52.93        | 31.92 |
| HS 578T                | 24.34 | -     | -     | 16.76 | -     | 13.31 | -     | 19.87 | <b>74.34</b> | <b>84.42</b> | 48.85 |
| BT-549                 | -     | -     | 15.75 | 11.73 | -     | 43.62 | 18.08 | 19.15 | 35.72        | 41.46        | 11.94 |
| T-47D                  | 25.99 | 23.03 | 13.50 | 10.38 | 33.18 | 68.67 | 46.84 | 15.89 | 26.75        | 44.55        | 12.46 |
| MDA-MB-468             | 14.26 | -     | -     | -     | -     | 19.68 | -     | -     | 37.89        | 49.44        | -     |
| Mean                   | 16.01 | -     | -     | -     | -     | 23.91 | 12.62 | -     | 34.42        | 39.54        | 14.01 |

\*GI % < 10

**Table 1b: *In vitro* growth inhibition percent (GI%) for the NCI60 cancer cell lines upon treatment with 10  $\mu$ M of Compounds (4a-p)**

|                            | 4e             | 4f           | 4g             | 4h | 4i           | 4j    | 4k    | 4l    | 4m    | 4n    | 4o    | 4p    |
|----------------------------|----------------|--------------|----------------|----|--------------|-------|-------|-------|-------|-------|-------|-------|
| Leukaemia                  |                |              |                |    |              |       |       |       |       |       |       |       |
| CCRF-CEM                   | L <sup>a</sup> | <b>95.51</b> | - <sup>b</sup> | -  | 37.86        | -     | 17.51 | 15.17 | 11.06 | 16.65 | -     | -     |
| HL-60(TB)                  | L              | L            | -              | -  | 36.50        | -     | -     | 12.21 | -     | -     | -     | -     |
| K-652                      | L              | <b>99.28</b> | -              | -  | 73.15        | 18.51 | 23.28 | 28.64 | 10.59 | 12.49 | -     | 17.97 |
| MOLT-4                     | L              | <b>92.21</b> | -              | -  | 49.82        | -     | 17.62 | 10.54 | -     | 12.40 | -     | -     |
| RPMI-8226                  | L              | L            | -              | -  | 56.41        | 14.97 | 17.84 | 15.46 | 14.20 | 22.34 | 15.35 | 18.39 |
| SR                         | L              | L            | -              | -  | <b>70.98</b> | -     | -     | -     | -     | -     | -     | -     |
| Non-small cell lung cancer |                |              |                |    |              |       |       |       |       |       |       |       |
| A549/ATCC                  | L              | L            | -              | -  | 38.33        | 27.72 | 18.72 | 13.07 | -     | -     | -     | 11.63 |
| EKVX                       | L              | <b>98.71</b> | -              | -  | 20.21        | 18.41 | 22.37 | 12.54 | -     | 18.68 | 13.93 | 20.31 |
| HOP-62                     | L              | L            | -              | -  | 10.31        | 64.39 | 26.33 | 12.81 | -     | -     | -     | -     |
| HOP-92                     | L              | L            | -              | -  | 22.73        | 66.16 | 47.05 | 39.32 | -     | -     | -     | -     |
| NCI-H226                   | L              | 23.08        | -              | -  | -            | 37.79 | -     | -     | -     | -     | -     | -     |
| NCI-H23                    | L              | L            | -              | -  | -            | 22.20 | 19.67 | -     | -     | -     | -     | -     |
| NCI-H322M                  | L              | 63.95        | -              | -  | 16           | 24.65 | 26.32 | 18.01 | -     | -     | -     | -     |
| NCI-H460                   | L              | L            | -              | -  | 35.06        | -     | -     | -     | -     | -     | -     | -     |

|                |   |              |       |       |       |              |       |       |       |       |       |       |
|----------------|---|--------------|-------|-------|-------|--------------|-------|-------|-------|-------|-------|-------|
| NCI-H522       | L | L            | -     | -     | 31.71 | 23.62        | 21.32 | 33.39 | -     | 10.27 | -     | 13.84 |
| Colon Cancer   |   |              |       |       |       |              |       |       |       |       |       |       |
| COLO 205       | L | L            | -     | -     | 13.56 | -            | -     | -     | -     | -     | -     | 12.23 |
| HCC-2998       | L | L            | -     | -     | -     | -            | -     | -     | -     | -     | -     | -     |
| HCT-116        | L | L            | -     | -     | 45.78 | 25.31        | 18.38 | 13.10 | -     | 11.81 | -     | 15.11 |
| HCT-15         | L | L            | -     | -     | 46.82 | -            | 15.69 | 10.32 | 10.81 | -     | -     | 13.95 |
| HT29           | L | L            | -     | -     | 67.00 | -            | -     | 10.57 | -     | -     | -     | -     |
| KM12           | L | L            | -     | -     | 19.06 | -            | -     | -     | -     | -     | -     | -     |
| SW-620         | L | L            | -     | -     | 10.04 | -            | -     | -     | -     | -     | -     | -     |
| CNS Cancer     |   |              |       |       |       |              |       |       |       |       |       |       |
| SF-268         | L | 58.46        | -     | -     | 26.82 | 15.77        | -     | -     | -     | 14.13 | -     | 15.26 |
| SF-295         | L | L            | -     | -     | 12.26 | 56.76        | 29.29 | 17.58 | -     | -     | -     | -     |
| SF-539         | L | L            | -     | -     | 14.45 | 54.78        | 40.98 | 31.78 | -     | -     | -     | -     |
| SNB-19         | L | 50.36        | -     | -     | 10.01 | 40.28        | 29.58 | 14.28 | -     | -     | -     | -     |
| SNB-75         | L | <b>80.66</b> | 15.86 | 19.47 | 41.03 | <b>74.91</b> | 25.71 | 35.62 | -     | 15.56 | 12.45 | 14.84 |
| U251           | L | L            | -     | -     | -     | 26.16        | -     | -     | -     | -     | -     | -     |
| Melanoma       |   |              |       |       |       |              |       |       |       |       |       |       |
| LOX IMVI       | L | L            | -     | -     | 25.45 | 22.86        | 20.90 | 12.85 | -     | -     | -     | -     |
| MALME-3M       | L | L            | -     | -     | -     | 39.52        | 27.18 | 11.70 | -     | -     | -     | -     |
| M14            | L | L            | -     | -     | 18.15 | 10.37        | -     | -     | -     | 10.14 | -     | 11.03 |
| MDA-MB-435     | L | L            | -     | -     | 12.84 | -            | -     | -     | -     | -     | -     | 10.29 |
| SK-MEL-2       | L | L            | -     | -     | -     | -            | -     | -     | -     | 10.64 | -     | 15.10 |
| SK-MEL-28      | L | L            | -     | -     | -     | 16.21        | 14.43 | -     | -     | -     | -     | -     |
| SK-MEL-5       | L | L            | -     | -     | 33.65 | -            | 16.39 | -     | -     | 12.43 | -     | 13.68 |
| UACC-257       | L | L            | -     | -     | 27.77 | -            | -     | -     | -     | 12.89 | -     | 14.05 |
| UACC-62        | L | L            | -     | -     | 19.60 | 22.49        | 19.78 | 12.96 | 16.18 | 25.83 | 18.11 | 29.69 |
| Ovarian Cancer |   |              |       |       |       |              |       |       |       |       |       |       |
| IGROV1         | L | L            | -     | -     | -     | 16.88        | -     | -     | -     | -     | -     | -     |
| OVCAR-3        | L | L            | -     | -     | 14.43 | 16.15        | -     | -     | -     | -     | -     | -     |
| OVCAR-4        | L | L            | -     | -     | 22.50 | 24.09        | -     | -     | -     | 10.40 | 12.28 | 10.63 |
| OVCAR-5        | L | <b>99.16</b> | -     | -     | -     | 17.45        | 16.79 | -     | -     | -     | -     | -     |
| OVCAR-8        | L | L            | -     | -     | 14.07 | 32.05        | 11.69 | 11.92 | -     | -     | -     | -     |
| NCI/ADR-RES    | L | L            | -     | -     | -     | 42.93        | 25.06 | 12.67 | -     | -     | -     | -     |
| SK-OV-3        | L | 43.30        | -     | -     | -     | 55.50        | 20.93 | -     | -     | -     | -     | -     |
| Renal Cancer   |   |              |       |       |       |              |       |       |       |       |       |       |
| 786-0          | L | L            | -     | -     | 29.30 | 67.06        | 26.44 | 44.23 | -     | -     | -     | -     |
| A498           | L | -            | -     | -     | 12.50 | -            | -     | -     | -     | -     | -     | -     |
| ACHN           | L | L            | -     | -     | 14.77 | 39.09        | 31.49 | 29.95 | -     | -     | -     | -     |
| CAKI-1         | L | L            | 10.98 | 11.67 | 37.93 | 57.49        | 34.76 | 36.94 | 10.65 | 16.34 | 13.69 | 16.64 |

|                 |          |              |       |       |       |              |       |       |       |       |       |       |
|-----------------|----------|--------------|-------|-------|-------|--------------|-------|-------|-------|-------|-------|-------|
| RXF 393         | <b>L</b> | <b>L</b>     | 15.23 | -     | 49.72 | <b>80.61</b> | 68.50 | 42.40 | -     | -     | -     | -     |
| SN12C           | <b>L</b> | <b>L</b>     | -     | -     | 12.61 | 20.47        | 15.82 | 11.94 | -     | -     | -     | -     |
| TK-10           | <b>L</b> | <b>L</b>     | -     | -     | -     | 14.97        | -     | -     | -     | -     | -     | -     |
| UO-31           | <b>L</b> | <b>91.74</b> | 11.87 | 12.10 | 36.00 | 30.15        | 40.05 | 17.62 | -     | -     | -     | -     |
| Prostate Cancer |          |              |       |       |       |              |       |       |       |       |       |       |
| PC-3            | <b>L</b> | <b>88.74</b> | -     | -     | 31.85 | 32.32        | 25.95 | 24.21 | -     | 25.21 | -     | 25.11 |
| DU-145          | <b>L</b> | <b>L</b>     | -     | -     | -     | -            | -     | -     | -     | -     | -     | -     |
| Breast Cancer   |          |              |       |       |       |              |       |       |       |       |       |       |
| MCF7            | <b>L</b> | <b>L</b>     | -     | -     | 30.78 | 14.77        | 17.63 | 12.79 | 16.08 | 24.84 | 14.77 | 21.28 |
| MDA-MB-231/ATCC | <b>L</b> | <b>L</b>     | -     | -     | 15.90 | 45.82        | 35.12 | 28.90 | -     | -     | -     | -     |
| HS 578T         | <b>L</b> | <b>L</b>     | -     | 10.10 | 32.04 | 60.43        | 42.57 | 31.10 | -     | -     | -     | -     |
| BT-549          | <b>L</b> | 17.34        | -     | -     | -     | 32.05        | 46.49 | 10.77 | -     | -     | -     | -     |
| T-47D           | <b>L</b> | <b>L</b>     | -     | -     | 42.49 | 18.27        | 28.64 | 18.05 | 15.11 | 24.33 | -     | 12.29 |
| MDA-MB-468      | <b>L</b> | <b>L</b>     | -     | -     | 29.17 | 23.57        | 12.43 | -     | -     | -     | 10.88 | 13.55 |
| Mean            | <b>L</b> | <b>L</b>     | -     | -     | 24.31 | 25.08        | 17.52 | 11.17 | -     | -     | -     | -     |

<sup>a</sup> GI % > 100

<sup>b</sup>GI % < 10
